# Supplementary material for: Social groups buffer maternal loss in mountain gorillas
Source: eLife. 2021 Mar 23;10:e62939. doi: 10.7554/eLife.62939 (PMC7987338; doi:10.7554/eLife.62939)
Supplement: Figure 2—source data 1. [file elife-62939-fig2-data1.xlsx]

## Sheet: fiG2
IMMATURE	Orphan_Incident	id	Orphan	NetworkSize	Age	ProportionalWeightedDegreeProximityCHANGE	ProportionalWeightedDegreeContactCHANGE	EigenvectorCentralityProximityCHANGE	EigenvectorCentralityContactCHANGE	ProportionalBinaryDegreeProximityCHANGE	BinaryDegreeContactCHANGE	ProportionalWeightedDegreeProximityBEFORE	ProportionalWeightedDegreeContactBEFORE	EigenvectorCentralityProximityBEFORE	EigenvectorCentralityContactBEFORE	ProportionalBinaryDegreeProximityBEFORE	ProportionalBinaryDegreeContactBEFORE	GrpMean_WeightedDegree_Proximity_Before	GrpMean_WeightedDegree_Contact_Before	GrpMean_EigenvectorCentrality_Proximity_Before	GrpMean_EigenvectorCentrality_Contact_Before	GrpMean_BinaryDegree_Proximity_Before	GrpMean_BinaryDegree_Contact_Before	PreFocals	PostFocals	TotalFocals
I033	G1_I114	I033G1_I114	0	22	3.92334	-0.077138	-0.289305	-0.183796	-0.733555	-0.279762	-0.1875	0.632015	0.992915	0.54831	1	0.904762	0.6875	0.636192	0.63166	0.586093	0.303288	0.938775	0.607143	65	65	130
I034	G1_I114	I034G1_I114	0	22	5.28131	0.317947	0.0551395	0.305905	0.0636147	-0.014881	-0.0625	0.56643	0.615702	0.515957	0.0950162	0.952381	0.5625	0.636192	0.63166	0.586093	0.303288	0.938775	0.607143	72	54	126
I098	G1_I114	I098G1_I114	0	22	7.19781	0.392456	-0.0486313	0.326657	-0.15956	-0.0625	0.2375	0.607544	0.645008	0.541037	0.187111	1	0.5625	0.636192	0.63166	0.586093	0.303288	0.938775	0.607143	66	53	119
I113	G1_I114	I113G1_I114	0	22	7.83025	-0.2961	-0.0776836	-0.277882	-0.0301011	-0.232143	0.3	0.716033	0.387064	0.660289	0.0620996	0.857143	0.5	0.636192	0.63166	0.586093	0.303288	0.938775	0.607143	54	60	114
I114	G1_I114	I114G1_I114	1	22	4.46	0.0452859	0.0509334	0.0530156	-0.0647359	-0.0625	-0.0625	0.650927	0.261826	0.610847	0.0888	1	0.5625	0.636192	0.63166	0.586093	0.303288	0.938775	0.607143	53	55	108
I119	G1_I114	I119G1_I114	0	22	3.47433	0.0919933	-0.27919	-0.0553122	-0.147605	-0.202381	0.0875	0.686139	1	0.630643	0.558773	0.952381	0.8125	0.636192	0.63166	0.586093	0.303288	0.938775	0.607143	54	77	131
I143	G1_I114	I143G1_I114	0	22	5.98494	0.173025	0.283652	0.164315	0.534908	0.0952381	0.3375	0.594253	0.519107	0.595565	0.131219	0.904762	0.5625	0.636192	0.63166	0.586093	0.303288	0.938775	0.607143	54	60	114
I023	G2_I028	I023G2_I028	0	8	4.51745	0.0448021	0.0947579	0.0951672	0.602151	0	-0.142857	0.955198	0.905242	0.904833	0.397849	1	1	0.792138	0.592054	0.549765	0.26517	1	0.833333	198	102	300
I028	G2_I028	I028G2_I028	1	8	4.85147	0.159814	0.019241	0.609788	-0.13249	0	0.190476	0.629078	0.278865	0.194697	0.13249	1	0.666667	0.792138	0.592054	0.549765	0.26517	1	0.833333	216	162	378
I058	G3_I082	I058G3_I082	0	10	3.46612	-0.0160656	0.113024	-0.00906198	0.249674	0	-0.125	0.889987	0.83642	0.891687	0.659264	1	1	0.886364	0.738725	0.897091	0.696434	1	0.958333	204	186	390
I082	G3_I082	I082G3_I082	1	10	4.59411	0.171211	0.579949	0.168279	0.529623	0	0.125	0.769105	0.379756	0.799586	0.430039	1	0.875	0.886364	0.738725	0.897091	0.696434	1	0.958333	216	192	408
I107	G3_I082	I107G3_I082	0	10	2.26694	0	0	0	0	0	-0.125	1	1	1	1	1	1	0.886364	0.738725	0.897091	0.696434	1	0.958333	204	203	407
I013	G4_I052	I013G4_I052	0	12	5.02943	-0.000455784	-0.0973697	0.0480134	0.0272707	0	0	0.70307	0.765807	0.6224	0.443942	1	1	0.794478	0.754946	0.774538	0.642899	1	0.886364	150	54	204
I027	G4_I052	I027G4_I052	0	12	6.20671	-0.0111991	0.0460788	-0.0404681	0.0290412	0	-0.0681818	0.838739	0.831468	0.894069	0.860448	1	0.818182	0.794478	0.754946	0.774538	0.642899	1	0.886364	162	60	222
I052	G4_I052	I052G4_I052	1	12	5.76591	0.0145598	0.0441953	0.0807366	0.0838758	0	-0.0340909	0.636102	0.422508	0.581681	0.27864	1	0.909091	0.794478	0.754946	0.774538	0.642899	1	0.886364	162	66	228
I095	G4_I052	I095G4_I052	0	12	2.29158	0	0	0	0.0114338	0	0.181818	1	1	1	0.988566	1	0.818182	0.794478	0.754946	0.774538	0.642899	1	0.886364	156	48	204
I013	G4_I103	I013G4_I103	0	13	2.39288	-0.253314	-0.341276	-0.270598	-0.497439	0	-0.4	1	1	1	1	1	1	0.796034	0.61274	0.699921	0.395154	0.958333	0.925926	95	102	197
I027	G4_I103	I027G4_I103	0	13	3.57016	-0.126112	-0.0999116	-0.110665	-0.0330785	0	-0.0888889	0.992633	0.875117	0.974888	0.574626	1	0.888889	0.796034	0.61274	0.699921	0.395154	0.958333	0.925926	107	102	209
I052	G4_I103	I052G4_I103	0	13	3.12936	0.105233	0.127533	0.255906	0.627557	0.0833333	-0.3	0.894767	0.872467	0.744094	0.372443	0.916667	1	0.796034	0.61274	0.699921	0.395154	0.958333	0.925926	101	102	203
I103	G4_I103	I103G4_I103	1	13	3.21424	0.306663	0.437798	0.367118	0.443744	0	0.333333	0.565444	0.262998	0.575419	0.153856	0.916667	0.666667	0.796034	0.61274	0.699921	0.395154	0.958333	0.925926	96	119	215
I106	G4_I103	I106G4_I103	0	13	3.75359	-0.113419	0.293773	-0.102888	0.0258526	0	-0.6	0.747884	0.30623	0.627957	0.29683	1	1	0.796034	0.61274	0.699921	0.395154	0.958333	0.925926	96	114	210
I119	G4_I103	I119G4_I103	0	13	7.70979	0.0802058	0.153669	0.136714	0.307386	0.0833333	-0.1	0.575475	0.359629	0.548144	0.174156	0.916667	1	0.796034	0.61274	0.699921	0.395154	0.958333	0.925926	102	89	191
I013	G4_I106	I013G4_I106	0	13	4.12047	0.120558	0.150519	0.157935	0.311653	0	0.106061	0.69915	0.686159	0.619023	0.385167	1	0.727273	0.621952	0.565746	0.64725	0.34523	1	0.818182	96	126	222
I027	G4_I106	I027G4_I106	0	13	5.29774	0.176859	0.323993	0.142356	0.352282	0	-0.166667	0.721186	0.520847	0.774067	0.499217	1	1	0.621952	0.565746	0.64725	0.34523	1	0.818182	90	192	282
I052	G4_I106	I052G4_I106	0	13	4.85695	0.143912	0.284851	0.171002	0.389655	0	0.0984848	0.659755	0.585947	0.567953	0.199704	1	0.818182	0.621952	0.565746	0.64725	0.34523	1	0.818182	72	150	222
I106	G4_I106	I106G4_I106	1	13	5.48118	0.324112	0.0126665	0.319595	0.226128	0	0.106061	0.407717	0.470029	0.356978	0.0958453	1	0.727273	0.621952	0.565746	0.64725	0.34523	1	0.818182	66	173	239
I005	G5_I005	I005G5_I005	1	14	6.38741	0.191694	0.0860028	0.544615	-0.0394207	0.0769231	-0.25	0.523568	0.221828	0.152687	0.0394207	0.923077	0.75	0.667849	0.274537	0.406758	0.0577567	0.865385	0.625	120	186	306
I030	G5_I005	I030G5_I005	0	14	4.06023	0.280743	0.340631	-0.0697376	0.278185	0.461538	0.0833333	0.588891	0.306661	1	0.0593113	0.538462	0.75	0.667849	0.274537	0.406758	0.0577567	0.865385	0.625	114	144	258
I050	G5_I005	I050G5_I005	0	14	7.91239	0.0369683	0.279462	0.0743908	0.150683	0	0	0.892877	0.245582	0.87813	0.00961173	1	0.75	0.667849	0.274537	0.406758	0.0577567	0.865385	0.625	162	162	324
I132	G5_I005	I132G5_I005	0	14	5.17728	0.240297	0.266427	0.396964	0.0800284	0	0.666667	0.666061	0.324077	0.473514	0.0204282	1	0.25	0.667849	0.274537	0.406758	0.0577567	0.865385	0.625	126	144	270
I030	G5_I030	I030G5_I030	1	8	5.54141	-0.245189	-0.250348	0.441031	-0.161566	0	-0.333333	0.854024	0.445243	0.1227	0.161566	1	1	0.877892	0.626223	0.803557	0.398344	1	0.722222	102	186	288
I038	G5_I030	I038G5_I030	0	8	3.12663	0.0302433	0.010032	0.0152121	0	0	0.5	0.969757	0.989968	0.984788	1	1	0.5	0.877892	0.626223	0.803557	0.398344	1	0.722222	96	174	270
I132	G5_I030	I132G5_I030	0	8	6.65845	0.0903072	0.307194	0.124493	0.301	0	0.166667	0.809895	0.443458	0.691813	0.0334658	1	0.666667	0.877892	0.626223	0.803557	0.398344	1	0.722222	84	168	252
I017	G6_I037	I017G6_I037	0	31	2.85284	0.191715	-0.0525928	0.131884	0.289025	0.052381	0.0333333	0.802743	0.845728	0.85599	0.0271202	0.714286	0.5	0.656742	0.500399	0.522137	0.135886	0.821429	0.634615	30	48	78
I029	G6_I037	I029G6_I037	1	31	7.24709	-0.0089177	-0.11403	0.382656	-0.0109402	0.00714286	-0.283333	0.653041	0.492167	0.0535211	0.0109402	0.892857	0.75	0.656742	0.500399	0.522137	0.135886	0.821429	0.634615	24	72	96
I031	G6_I037	I031G6_I037	0	31	3.68789	0.170217	0.424402	0.0275459	0.335079	-0.0595238	-0.4	0.66495	0.381209	0.726181	0.136192	0.892857	1	0.656742	0.500399	0.522137	0.135886	0.821429	0.634615	30	54	84
I037	G6_I037	I037G6_I037	1	31	2.705	0.412801	0.562711	0.647386	-0.0343544	0.0142857	-0.283333	0.587199	0.306043	0.352614	0.0343544	0.785714	0.75	0.656742	0.500399	0.522137	0.135886	0.821429	0.634615	36	84	120
I045	G6_I037	I045G6_I037	0	31	3.42231	0.221727	0.14218	0.0647373	0.253402	0.0404762	-0.208333	0.773604	0.641561	0.774871	0.0403164	0.892857	0.875	0.656742	0.500399	0.522137	0.135886	0.821429	0.634615	40	42	82
I073	G6_I037	I073G6_I037	0	31	4.76934	-0.123313	-0.171514	-0.244529	0.147429	0.15	-0.216667	0.802049	0.718945	0.81548	0.0557624	0.75	0.75	0.656742	0.500399	0.522137	0.135886	0.821429	0.634615	30	60	90
I084	G6_I037	I084G6_I037	1	31	3.19233	0.369905	0.141603	0.302321	0.129641	0.0428571	-0.0333333	0.448379	0.168599	0.415736	0.0212352	0.857143	0.5	0.656742	0.500399	0.522137	0.135886	0.821429	0.634615	36	66	102
I086	G6_I037	I086G6_I037	0	31	2.24778	0.0758818	0.0694206	-0.063216	0.208687	0.00952381	-0.2	0.834988	0.850255	0.811195	0.234051	0.857143	1	0.656742	0.500399	0.522137	0.135886	0.821429	0.634615	24	54	78
I088	G6_I037	I088G6_I037	0	31	6.55441	-0.0724222	0.309442	-0.185849	0.0925771	0.0404762	0.0333333	0.730482	0.23163	0.61148	0.0176439	0.892857	0.5	0.656742	0.500399	0.522137	0.135886	0.821429	0.634615	24	36	60
I111	G6_I037	I111G6_I037	0	31	5.18275	0.23231	0.326182	0.189946	0.262681	0.116667	0.216667	0.445977	0.0913838	0.402426	0.0510432	0.75	0.25	0.656742	0.500399	0.522137	0.135886	0.821429	0.634615	24	30	54
I124	G6_I037	I124G6_I037	0	31	3.97262	0.219281	0.0872211	0.170523	0.143334	0.0428571	0.216667	0.480741	0.459128	0.406733	0.00706585	0.857143	0.25	0.656742	0.500399	0.522137	0.135886	0.821429	0.634615	42	48	90
I131	G6_I037	I131G6_I037	0	31	7.69336	0.085807	0.156394	-0.0370892	0.0597285	-0.0261905	-0.1	0.597903	0.318538	0.470079	0.00291881	0.892857	0.5	0.656742	0.500399	0.522137	0.135886	0.821429	0.634615	30	66	96
WIR	G6_I037	WIRG6_I037	0	31	2.29158	0.1189	0	0.119467	0	0.190476	-0.025	0.715587	1	0.62288	1	0.642857	0.625	0.656742	0.500399	0.522137	0.135886	0.821429	0.634615	24	48	72
I002	G6_I043	I002G6_I043	0	43	2.78987	0.244676	0.0196709	0.298224	-0.117977	0.0769231	0.0557276	0.55573	0.780544	0.410752	0.47655	0.794872	0.473684	0.639102	0.677626	0.569694	0.405896	0.769231	0.5311	60	54	114
I011	G6_I043	I011G6_I043	0	43	2.91034	0.062947	-0.0994363	0.0886662	0.415289	-0.179487	-0.0495356	0.876147	0.903199	0.853805	0.47037	0.923077	0.578947	0.639102	0.677626	0.569694	0.405896	0.769231	0.5311	48	48	96
I014	G6_I043	I014G6_I043	0	43	3.70431	0.13326	0.0246419	0.0231782	-0.123033	0.153846	0.448916	0.673275	0.689522	0.501573	0.175792	0.769231	0.315789	0.639102	0.677626	0.569694	0.405896	0.769231	0.5311	36	66	102
I043	G6_I043	I043G6_I043	1	43	5.65092	0.0780159	-0.254703	0.0728771	-0.117207	0.102564	-0.226006	0.439077	0.384281	0.354382	0.159643	0.769231	0.578947	0.639102	0.677626	0.569694	0.405896	0.769231	0.5311	40	57	97
I047	G6_I043	I047G6_I043	0	43	2.59001	-0.0578792	-0.333873	-0.0718774	-0.748629	0.102564	-0.00309598	0.937625	1	0.976731	1	0.74359	0.473684	0.639102	0.677626	0.569694	0.405896	0.769231	0.5311	53	66	119
I049	G6_I043	I049G6_I043	0	43	6.22313	0.0857179	-0.210708	0.0841592	-0.041759	0.0512821	-0.0433437	0.459154	0.536745	0.337338	0.139896	0.846154	0.631579	0.639102	0.677626	0.569694	0.405896	0.769231	0.5311	42	66	108
I061	G6_I043	I061G6_I043	0	43	6.22861	0.084244	0.0829329	0.0167095	0.26719	-0.0512821	-0.0495356	0.693458	0.569188	0.683926	0.361739	0.871795	0.578947	0.639102	0.677626	0.569694	0.405896	0.769231	0.5311	48	42	90
I104	G6_I043	I104G6_I043	0	43	7.38125	-0.126501	-0.138847	-0.00671251	-0.0104385	0	-0.0154799	0.226021	0.302283	0.0545465	0.0166646	0.461538	0.368421	0.639102	0.677626	0.569694	0.405896	0.769231	0.5311	54	18	72
I122	G6_I043	I122G6_I043	0	43	2.33539	0.0479267	-0.0755806	0.0964962	-0.198771	0.128205	-0.173375	0.914436	0.91896	0.903504	0.702567	0.717949	0.526316	0.639102	0.677626	0.569694	0.405896	0.769231	0.5311	36	54	90
I135	G6_I043	I135G6_I043	0	43	6.15469	0.230036	-0.212483	0.245959	0.00279984	0.179487	-0.20743	0.521834	0.640541	0.478029	0.225291	0.717949	0.736842	0.639102	0.677626	0.569694	0.405896	0.769231	0.5311	48	58	106
I138	G6_I043	I138G6_I043	0	43	6.97057	-0.199416	-0.486081	-0.254031	-0.720138	-0.0769231	-0.226006	0.733367	0.728619	0.712054	0.736345	0.846154	0.578947	0.639102	0.677626	0.569694	0.405896	0.769231	0.5311	44	39	83
I002	G6_I055	I002G6_I055	0	54	2.41752	-0.0990683	0.0847456	-0.133284	0.127994	-0.254902	-0.0315789	0.70513	0.712702	0.598866	0.474789	1	0.631579	0.565721	0.644273	0.463321	0.370547	0.746296	0.657895	72	54	126
I011	G6_I055	I011G6_I055	0	54	2.53799	-0.0534082	-0.197833	-0.0321261	-0.494401	-0.020915	-0.236842	0.966917	0.996791	1	1	0.844444	0.736842	0.565721	0.644273	0.463321	0.370547	0.746296	0.657895	60	42	102
I014	G6_I055	I014G6_I055	0	54	3.33196	-0.178519	-0.275804	-0.191573	-0.449764	-0.166013	-0.497368	0.817538	1	0.700597	0.682773	0.911111	0.947368	0.565721	0.644273	0.463321	0.370547	0.746296	0.657895	71	42	113
I015	G6_I055	I015G6_I055	0	54	6.02053	0.170583	-0.327017	0.186669	-0.0864087	0.122876	-0.131579	0.387392	0.772653	0.0772587	0.165014	0.622222	0.631579	0.565721	0.644273	0.463321	0.370547	0.746296	0.657895	72	36	108
I047	G6_I055	I047G6_I055	0	54	2.21766	-0.0480086	0.395461	-0.0368949	0.582661	-0.0379085	-0.0815789	0.895321	0.604539	0.921769	0.417339	0.822222	0.631579	0.565721	0.644273	0.463321	0.370547	0.746296	0.657895	60	59	119
I049	G6_I055	I049G6_I055	0	54	5.85079	0.0382	-0.0421664	0.0384931	-0.00239623	-0.230065	0.121053	0.476872	0.570308	0.357561	0.186818	0.955556	0.578947	0.565721	0.644273	0.463321	0.370547	0.746296	0.657895	66	42	108
I055	G6_I055	I055G6_I055	1	54	4.36413	0.324978	0.146858	0.186471	0.0334129	0.192157	0.0815789	0.196575	0.140004	0.0606531	0.0234382	0.533333	0.368421	0.565721	0.644273	0.463321	0.370547	0.746296	0.657895	72	48	120
I061	G6_I055	I061G6_I055	0	54	5.85626	0.05226	-0.417882	0.1307	-0.453142	0.0235294	-0.35	0.722189	0.992971	0.705728	0.765416	0.8	1	0.565721	0.644273	0.463321	0.370547	0.746296	0.657895	66	48	114
I089	G6_I055	I089G6_I055	0	54	3.82204	0.289886	0.18319	0.0731234	0.00422102	0.312418	0.444737	0.258097	0.440606	0.105942	0.0816572	0.177778	0.105263	0.565721	0.644273	0.463321	0.370547	0.746296	0.657895	72	30	102
I104	G6_I055	I104G6_I055	0	54	7.0089	-0.134772	-0.17996	-0.0238118	-0.0463877	-0.159477	-0.0263158	0.359071	0.448059	0.103523	0.0799515	0.688889	0.526316	0.565721	0.644273	0.463321	0.370547	0.746296	0.657895	64	66	130
I135	G6_I055	I135G6_I055	0	54	5.78234	-0.0131281	-0.177083	-0.0188609	-0.178905	-0.135948	-0.3	0.541962	0.660908	0.536624	0.444422	0.822222	1	0.565721	0.644273	0.463321	0.370547	0.746296	0.657895	71	53	124
I138	G6_I055	I138G6_I055	0	54	6.59822	0.20144	0.212604	0.262723	0.36938	-0.0326797	-0.236842	0.461587	0.391736	0.408816	0.205426	0.777778	0.736842	0.565721	0.644273	0.463321	0.370547	0.746296	0.657895	59	55	114
I017	G6_I086	I017G6_I086	0	27	4.12594	0.0865631	-0.231586	0.138752	-0.187587	-0.0769231	-0.122172	0.822047	0.825746	0.766943	0.373159	1	0.769231	0.789192	0.824787	0.763993	0.480248	0.975962	0.759615	84	72	156
I031	G6_I086	I031G6_I086	1	27	4.96099	0.0726494	-0.354722	0.602092	-0.264067	0.0769231	0.244344	0.745135	0.792968	0.19478	0.264067	0.923077	0.461538	0.789192	0.824787	0.763993	0.480248	0.975962	0.759615	60	72	132
I045	G6_I086	I045G6_I086	0	27	4.69541	0.174834	-0.213116	0.151126	-0.133086	0	0.0361991	0.825166	0.901634	0.772889	0.299694	0.961538	0.846154	0.789192	0.824787	0.763993	0.480248	0.975962	0.759615	66	78	144
I073	G6_I086	I073G6_I086	0	27	6.04244	0.0721951	-0.326791	0.0461599	-0.390748	0	-0.081448	0.617291	0.928873	0.5941	0.509309	0.961538	0.846154	0.789192	0.824787	0.763993	0.480248	0.975962	0.759615	90	72	162
I086	G6_I086	I086G6_I086	1	27	3.52088	0.207468	-0.136314	0.225829	-0.130279	-0.0384615	-0.040724	0.750342	0.649986	0.730479	0.37569	0.961538	0.923077	0.789192	0.824787	0.763993	0.480248	0.975962	0.759615	66	60	126
I111	G6_I086	I111G6_I086	0	27	6.45585	0.114905	0.0693524	0.0311763	0.0855366	-0.0769231	0.285068	0.732433	0.507401	0.761133	0.522701	1	0.538462	0.789192	0.824787	0.763993	0.480248	0.975962	0.759615	90	84	174
I124	G6_I086	I124G6_I086	0	27	5.24572	-0.0429527	-0.322561	-0.0489905	-0.326717	-0.0769231	-0.180995	0.821124	1	0.760218	0.62524	1	0.769231	0.789192	0.824787	0.763993	0.480248	0.975962	0.759615	84	60	144
WIR	G6_I086	WIRG6_I086	0	27	3.56468	-0.104915	0.00831426	-0.179496	0	-0.0384615	-0.276018	1	0.991686	1	1	1	0.923077	0.789192	0.824787	0.763993	0.480248	0.975962	0.759615	72	60	132
I002	G6_I087	I002G6_I087	0	43	2.89391	0.0606109	-0.203666	0.0596864	-0.614122	0.2	-0.328947	0.64153	0.985523	0.528739	0.834496	0.725	0.578947	0.693744	0.708324	0.598633	0.41049	0.808333	0.609649	60	54	114
I011	G6_I087	I011G6_I087	0	43	3.01437	-0.0260365	0.0552201	0.0760091	0.442401	-0.15	0.0236842	0.911995	0.850611	0.832869	0.401058	0.9	0.526316	0.693744	0.708324	0.598633	0.41049	0.808333	0.609649	42	48	90
I014	G6_I087	I014G6_I087	0	43	3.80835	0.142304	0.127752	0.111262	-0.0663101	0.175	0.431579	0.664756	0.622268	0.450551	0.109213	0.8	0.368421	0.693744	0.708324	0.598633	0.41049	0.808333	0.609649	36	66	102
I047	G6_I087	I047G6_I087	0	43	2.69405	-0.0741106	-0.504248	-0.0797012	-0.878518	-0.1	-0.228947	0.908072	1	0.966606	1	0.85	0.578947	0.693744	0.708324	0.598633	0.41049	0.808333	0.609649	59	48	107
I049	G6_I087	I049G6_I087	0	43	6.32717	0.0439685	-0.338057	0.0960997	-0.0656169	0.2	-0.131579	0.503585	0.568373	0.351944	0.147	0.775	0.631579	0.693744	0.708324	0.598633	0.41049	0.808333	0.609649	36	66	102
I061	G6_I087	I061G6_I087	0	43	6.33265	0.021404	0.216736	-0.0175369	0.523852	0.1	-0.181579	0.709207	0.510412	0.680151	0.221661	0.825	0.631579	0.693744	0.708324	0.598633	0.41049	0.808333	0.609649	48	66	114
I069	G6_I087	I069G6_I087	1	43	7.81109	0.058979	-0.360681	0.0446941	-0.138098	0.025	-0.334211	0.546913	0.546812	0.431418	0.183427	0.85	0.684211	0.693744	0.708324	0.598633	0.41049	0.808333	0.609649	48	48	96
I087	G6_I087	I087G6_I087	1	43	4.12047	-0.0521141	-0.314765	-0.0122691	-0.187997	-0.025	-0.436842	0.654314	0.583327	0.525557	0.268232	0.875	0.736842	0.693744	0.708324	0.598633	0.41049	0.808333	0.609649	42	59	101
I089	G6_I087	I089G6_I087	0	43	4.29843	0.0900619	-0.0246947	-0.0236261	-0.108245	-0.025	-0.0263158	0.447422	0.55895	0.253004	0.126139	0.625	0.526316	0.693744	0.708324	0.598633	0.41049	0.808333	0.609649	30	78	108
I122	G6_I087	I122G6_I087	0	43	2.43943	-0.160953	-0.360368	-0.12228	-0.555347	0.025	-0.234211	1	0.996466	1	0.850132	0.8	0.684211	0.693744	0.708324	0.598633	0.41049	0.808333	0.609649	36	77	113
I135	G6_I087	I135G6_I087	0	43	6.25873	0.105859	-0.253273	0.10502	-0.113648	0.025	-0.442105	0.579272	0.641768	0.540631	0.250965	0.825	0.842105	0.693744	0.708324	0.598633	0.41049	0.808333	0.609649	53	53	106
I138	G6_I087	I138G6_I087	0	43	7.07461	-0.352311	-0.478522	-0.422614	-0.568273	-0.15	-0.276316	0.757865	0.635373	0.769182	0.578037	0.85	0.526316	0.693744	0.708324	0.598633	0.41049	0.808333	0.609649	55	22	77
I011	G6_I089	I011G6_I089	0	16	5.73854	-0.359081	-0.368366	-0.306651	-0.858253	0.152381	0	0.993085	1	0.658152	1	0.714286	1	0.829655	0.635151	0.613904	0.344253	0.742857	0.733333	18	48	66
I035	G6_I089	I035G6_I089	0	16	4.10951	0.105013	0.400545	0.0729788	0.779121	-0.0619048	0	0.827258	0.599455	0.870668	0.220879	0.928571	1	0.829655	0.635151	0.613904	0.344253	0.742857	0.733333	24	54	78
I047	G6_I089	I047G6_I089	0	16	5.41821	-0.107932	-0.0848881	-0.124229	-0.0623414	0.147619	0	0.467043	0.160408	0.287699	0.107105	0.785714	0.5	0.829655	0.635151	0.613904	0.344253	0.742857	0.733333	18	48	66
I089	G6_I089	I089G6_I089	1	16	7.02259	-0.482799	-0.473286	0.0482742	0.0266797	0.295238	0.166667	0.860891	0.801955	0.0884522	0.00117909	0.571429	0.333333	0.829655	0.635151	0.613904	0.344253	0.742857	0.733333	42	50	92
I122	G6_I089	I122G6_I089	0	16	5.16359	-0.0976494	-0.0913304	-0.154769	0.192381	0.285714	-0.166667	1	0.613938	1	0.26714	0.714286	0.833333	0.829655	0.635151	0.613904	0.344253	0.742857	0.733333	36	60	96
I001	G6_I115	I001G6_I115	1	48	6.782	0.0837499	0.0770692	-0.0358188	0.00106814	0.0547804	-0.396825	0.55417	0.409274	0.540708	0.10567	0.767442	0.777778	0.644308	0.557121	0.577407	0.167252	0.758139	0.62963	59	54	113
I002	G6_I115	I002G6_I115	0	48	2.705	0.298653	0.222726	0.281446	0.61184	0.00826873	-0.18254	0.547397	0.668615	0.422288	0.173602	0.813953	0.611111	0.644308	0.557121	0.577407	0.167252	0.758139	0.62963	66	48	114
I011	G6_I115	I011G6_I115	0	48	2.825	0.0505147	0.132634	0.0329898	0.72159	-0.17261	-0.190476	0.913824	0.714551	0.91676	0.240899	0.883721	0.666667	0.644308	0.557121	0.577407	0.167252	0.758139	0.62963	48	48	96
I014	G6_I115	I014G6_I115	0	48	3.619	0.0480899	0.313406	-0.211994	0.0756985	-0.0129199	0.174603	0.748499	0.562723	0.709853	0.141024	0.790698	0.444444	0.644308	0.557121	0.577407	0.167252	0.758139	0.62963	54	54	108
I041	G6_I115	I041G6_I115	1	48	6.74333	-0.021793	-0.0312079	-0.12987	-0.139589	0.0527132	-0.111111	0.561268	0.531297	0.529956	0.274703	0.813953	0.777778	0.644308	0.557121	0.577407	0.167252	0.758139	0.62963	48	36	84
I047	G6_I115	I047G6_I115	0	48	2.505	-0.0848699	-0.110447	-0.0655879	0.314128	0.0547804	-0.119048	0.995042	0.840836	1	0.307144	0.767442	0.5	0.644308	0.557121	0.577407	0.167252	0.758139	0.62963	59	60	119
I049	G6_I115	I049G6_I115	0	48	6.138	-0.000916692	-0.271965	-0.082149	-0.0247614	-0.0372093	-0.34127	0.505444	0.620105	0.426871	0.163781	0.837209	0.722222	0.644308	0.557121	0.577407	0.167252	0.758139	0.62963	48	48	96
I061	G6_I115	I061G6_I115	0	48	6.144	-0.0213782	-0.10888	-0.151296	0.195584	-0.0594315	-0.507937	0.741754	0.636963	0.76928	0.200188	0.837209	0.888889	0.644308	0.557121	0.577407	0.167252	0.758139	0.62963	66	36	102
I089	G6_I115	I089G6_I115	0	48	4.11	0.0457358	0.160813	0.0629551	0.0936398	0.022739	0.126984	0.502253	0.53116	0.144011	0.0238334	0.488372	0.444444	0.644308	0.557121	0.577407	0.167252	0.758139	0.62963	48	60	108
I104	G6_I115	I104G6_I115	0	48	7.296	-0.147808	-0.083015	-0.0317172	0.00734215	-0.111628	-0.103175	0.259466	0.257237	0.0779637	0.0138294	0.511628	0.388889	0.644308	0.557121	0.577407	0.167252	0.758139	0.62963	60	24	84
I115	G6_I115	I115G6_I115	1	48	3.35113	0.0568344	0.448476	-0.146288	0.0424914	0.0284238	0.190476	0.805404	0.384398	0.777554	0.119464	0.860465	0.666667	0.644308	0.557121	0.577407	0.167252	0.758139	0.62963	54	84	138
I118	G6_I115	I118G6_I115	1	48	7.21697	0.0560012	0.0255622	0.0234328	0.00541339	0.0780362	-0.15873	0.462707	0.321992	0.319941	0.0517909	0.744186	0.444444	0.644308	0.557121	0.577407	0.167252	0.758139	0.62963	54	48	102
I122	G6_I115	I122G6_I115	0	48	2.251	0.0521746	0.211508	0.108166	0.759397	0.055814	-0.230159	0.909532	0.788492	0.891834	0.240603	0.744186	0.611111	0.644308	0.557121	0.577407	0.167252	0.758139	0.62963	42	48	90
I135	G6_I115	I135G6_I115	0	48	6.07	0.229493	-0.0153953	0.214281	0.179099	0.123514	-0.190476	0.506315	0.512205	0.492765	0.230515	0.72093	0.666667	0.644308	0.557121	0.577407	0.167252	0.758139	0.62963	54	52	106
I138	G6_I115	I138G6_I115	0	48	6.886	-0.0154214	-0.163951	-0.0814889	-0.0854935	-0.0351421	-0.404762	0.651536	0.576968	0.641328	0.221737	0.790698	0.833333	0.644308	0.557121	0.577407	0.167252	0.758139	0.62963	54	41	95
I002	G6_I121	I002G6_I121	0	45	2.7488	0.201464	-0.148846	0.234863	-0.469966	0.05	-0.0495356	0.577886	0.856789	0.436794	0.768901	0.825	0.578947	0.628838	0.634259	0.516083	0.416549	0.716667	0.513158	66	48	114
I011	G6_I121	I011G6_I121	0	45	2.86927	0.0306894	-0.0899032	0.0502204	0.24306	-0.125	-0.0495356	0.902906	0.885149	0.883023	0.640595	0.925	0.578947	0.628838	0.634259	0.516083	0.416549	0.716667	0.513158	48	48	96
I014	G6_I121	I014G6_I121	0	45	3.66324	0.0922568	0.050915	-0.0478902	-0.248566	0.125	0.343653	0.720128	0.693348	0.574611	0.310274	0.8	0.421053	0.628838	0.634259	0.516083	0.416549	0.716667	0.513158	48	60	108
I047	G6_I121	I047G6_I121	0	45	2.54894	-0.0652666	-0.177383	-0.0327681	-0.605964	0.125	0.0495356	0.956935	0.879802	0.957899	0.877208	0.75	0.421053	0.628838	0.634259	0.516083	0.416549	0.716667	0.513158	59	66	125
I049	G6_I121	I049G6_I121	0	45	6.18207	0.0503475	-0.209243	0.0293065	-0.15303	0	-0.154799	0.489285	0.546874	0.380373	0.262463	0.875	0.684211	0.628838	0.634259	0.516083	0.416549	0.716667	0.513158	42	54	96
I061	G6_I121	I061G6_I121	0	45	6.18754	0.0697325	0.0140994	-0.00996651	0.183467	-0.075	-0.318885	0.696334	0.601374	0.692583	0.447719	0.875	0.789474	0.628838	0.634259	0.516083	0.416549	0.716667	0.513158	66	42	108
I089	G6_I121	I089G6_I121	0	45	4.15332	0.0498789	0.0906752	0.0999556	-0.0141504	0.075	0.173375	0.513468	0.532565	0.142178	0.0611066	0.5	0.473684	0.628838	0.634259	0.516083	0.416549	0.716667	0.513158	42	66	108
I104	G6_I121	I104G6_I121	0	45	7.34018	-0.161714	-0.134786	-0.0254884	-0.0216169	0	-0.0154799	0.251981	0.289226	0.0666769	0.0281636	0.45	0.368421	0.628838	0.634259	0.516083	0.416549	0.716667	0.513158	54	24	78
I121	G6_I121	I121G6_I121	1	45	3.8987	0.28959	-0.0550132	0.326414	-0.0815406	0.1	-0.0804954	0.469293	0.184537	0.467256	0.0996726	0.725	0.315789	0.628838	0.634259	0.516083	0.416549	0.716667	0.513158	42	66	108
I122	G6_I121	I122G6_I121	0	45	2.29432	0.00836559	-0.131277	0.0264257	-0.502891	0.125	-0.167183	0.947577	0.98042	0.953158	1	0.725	0.578947	0.628838	0.634259	0.516083	0.416549	0.716667	0.513158	42	54	96
I135	G6_I121	I135G6_I121	0	45	6.11362	0.156827	-0.265236	0.147668	-0.248517	0.15	-0.20743	0.563819	0.688808	0.531144	0.475551	0.75	0.736842	0.628838	0.634259	0.516083	0.416549	0.716667	0.513158	48	58	106
I138	G6_I121	I138G6_I121	0	45	6.9295	0.0890421	-0.115744	0.115347	-0.00597417	0.25	-0.0340557	0.456445	0.472216	0.107305	0.0269379	0.4	0.210526	0.628838	0.634259	0.516083	0.416549	0.716667	0.513158	48	41	89
I016	G7_I016	I016G7_I016	1	25	4.03	-0.00980226	-0.282494	-0.127556	-0.0525096	0.208333	0.472222	0.604237	0.569731	0.441332	0.13953	0.625	0.416667	0.7687	0.537085	0.628014	0.148025	0.8125	0.458333	54	95	149
I057	G7_I016	I057G7_I016	0	25	2.51061	-0.0855588	0.0624269	-0.462962	0.45674	0.166667	0.5	1	0.937573	0.949059	0.327699	0.791667	0.5	0.7687	0.537085	0.628014	0.148025	0.8125	0.458333	47	84	131
I060	G7_I016	I060G7_I016	0	25	4.3614	-0.281531	0.0428054	-0.275853	0.0695335	-0.125	0.222222	0.788527	0.28266	0.503875	0.041767	0.958333	0.333333	0.7687	0.537085	0.628014	0.148025	0.8125	0.458333	41	106	147
I064	G7_I016	I064G7_I016	0	25	5.40178	-0.199554	-0.305048	-0.247129	-0.0668461	0	-0.0555556	0.636405	0.620605	0.437465	0.0998011	0.833333	0.5	0.7687	0.537085	0.628014	0.148025	0.8125	0.458333	52	84	136
I066	G7_I016	I066G7_I016	0	25	4.52019	0.0700208	0.162319	0.131017	0.162437	-0.0416667	0.472222	0.673856	0.196068	0.613004	0.172979	0.791667	0.416667	0.7687	0.537085	0.628014	0.148025	0.8125	0.458333	48	84	132
I142	G7_I016	I142G7_I016	0	25	6.33539	-0.432357	-0.213724	-0.575078	0.194672	0.0416667	0.305556	0.909173	0.615875	0.823347	0.10637	0.875	0.583333	0.7687	0.537085	0.628014	0.148025	0.8125	0.458333	60	77	137
I036	G7_I116	I036G7_I116	0	22	3.83025	-0.135819	0.194459	0.0118091	0	-0.05	0.2	0.735596	0	0.647193	0	0.85	0	0.60277	0.416	0.542412	0.2	0.8	0.6	65	41	106
I053	G7_I116	I053G7_I116	0	22	7.8193	-0.138855	-0.154802	-0.098849	2.59388e-06	0	-0.6	0.607911	0.54	0.517248	0	0.85	1	0.60277	0.416	0.542412	0.2	0.8	0.6	78	42	120
I063	G7_I116	I063G7_I116	0	22	7.14031	0.124766	0.14143	0.107751	1.27913e-05	0	-0.4	0.479092	0.54	0.402169	0	0.8	1	0.60277	0.416	0.542412	0.2	0.8	0.6	72	48	120
I116	G7_I116	I116G7_I116	1	22	5.03	0.0484546	0.395827	-0.00157562	4.75121e-06	0.05	0.4	0.470289	0	0.482008	0	0.75	0	0.60277	0.416	0.542412	0.2	0.8	0.6	77	72	149
I117	G7_I116	I117G7_I116	0	22	3.63587	-0.0832696	0	-0.0384583	-0.999981	0.1	0	0.72096	1	0.663444	0.999999	0.75	1	0.60277	0.416	0.542412	0.2	0.8	0.6	84	66	150
I004	G9_I004	I004G9_I004	1	7	2.91034	0.0621394	0.11022	0.0364707	0.350891	0	-0.2	0.937861	0.88978	0.963529	0.649109	1	1	0.840911	0.748668	0.829785	0.609679	1	0.8	168	240	408
I018	G9_I004	I018G9_I004	0	7	4.84873	-0.0978569	-0.430536	-0.0566922	-0.621241	0	0.2	0.952424	1	0.862716	1	1	0.8	0.840911	0.748668	0.829785	0.609679	1	0.8	144	216	360
I048	G9_I004	I048G9_I004	1	7	6.73238	0.157482	0.124258	0.160226	0.292364	0	0.2	0.52707	0.382577	0.526079	0.228883	1	0.6	0.840911	0.748668	0.829785	0.609679	1	0.8	114	251	365
I130	G9_I004	I130G9_I004	1	7	5.90828	-0.0273132	0.135161	-0.0351679	0.333526	0	0	0.94629	0.722317	0.966817	0.560725	1	0.8	0.840911	0.748668	0.829785	0.609679	1	0.8	162	251	413
