# Supplementary material for: Social groups buffer maternal loss in mountain gorillas
Source: eLife. 2021 Mar 23;10:e62939. doi: 10.7554/eLife.62939 (PMC7987338; doi:10.7554/eLife.62939)
Supplement: Figure 3—source data 1. [file elife-62939-fig3-data1.xlsx]

## Sheet: Sheet1
IMMATURE	Orphan_group	Group	AgeO	SexO	id	Cat	MeanDen	ContactChange	ProximityChange	Mother	ORPHAN
I001	G6_I115	G6	6.782	F	I002	INF	113.5	-0.016	-0.0123922	0	O
I001	G6_I115	G6	6.782	F	I007	AF	137	0	0.015873	0	O
I001	G6_I115	G6	6.782	F	I010	DSB	401	-0.000186828	-0.018745	0	O
I001	G6_I115	G6	6.782	F	I011	INF	104.5	0	0.0120946	0	O
I001	G6_I115	G6	6.782	F	I012	AF	92.5	0	0	0	O
I001	G6_I115	G6	6.782	F	I014	INF	110.5	-0.00884956	-0.0530973	0	O
I001	G6_I115	G6	6.782	F	I015	SAF	89.5	0	0.00507189	0	O
I001	G6_I115	G6	6.782	F	I019	BB	139	-0.00704225	-0.00704225	0	O
I001	G6_I115	G6	6.782	F	I020	AF	92	0	0.00402661	0	O
I001	G6_I115	G6	6.782	F	I021	SB	143.5	0.00840336	0.00874221	0	O
I001	G6_I115	G6	6.782	F	I022	AF	107.5	0	0.0426507	0	O
I001	G6_I115	G6	6.782	F	I024	BB	121.5	0	-0.00881664	0	O
I001	G6_I115	G6	6.782	F	I025	AF	120	0.0146417	0.132814	0	O
I001	G6_I115	G6	6.782	F	I040	AF	151	0	0.0277778	0	O
I001	G6_I115	G6	6.782	F	I041	SAM	98.5	-0.00854701	0.0755651	0	O
I001	G6_I115	G6	6.782	F	I042	SB	194.5	0	-0.00698781	0	O
I001	G6_I115	G6	6.782	F	I043	JUV	112	-0.0373832	0.00229064	0	O
I001	G6_I115	G6	6.782	F	I047	INF	116	0	0	0	O
I001	G6_I115	G6	6.782	F	I049	SAM	104.5	0	0.0175439	0	O
I001	G6_I115	G6	6.782	F	I054	BB	110	-0.008	0.104	0	O
I001	G6_I115	G6	6.782	F	I055	JUV	116.5	0	-0.0187316	0	O
I001	G6_I115	G6	6.782	F	I061	SAM	107.5	0.0196078	0.0799112	0	O
I001	G6_I115	G6	6.782	F	I062	BB	116.5	0	0.0105169	0	O
I001	G6_I115	G6	6.782	F	I069	SAM	104	-0.00943396	-0.0471698	0	O
I001	G6_I115	G6	6.782	F	I07I	AF	125.5	0	0.00929575	0	O
I001	G6_I115	G6	6.782	F	I072	AF	92	0	0.0135135	0	O
I001	G6_I115	G6	6.782	F	I076	AF	116	0	0	0	O
I001	G6_I115	G6	6.782	F	I078	BB	127	0	0.0121881	0	O
I001	G6_I115	G6	6.782	F	I080	AF	119	0	-0.00359239	0	O
I001	G6_I115	G6	6.782	F	I081	AF	125	0	0	0	O
I001	G6_I115	G6	6.782	F	I087	INF	107	0	-0.00410831	0	O
I001	G6_I115	G6	6.782	F	I089	JUV	110.5	0	0.0075	0	O
I001	G6_I115	G6	6.782	F	I093	AF	111.5	0	-0.0252101	0	O
I001	G6_I115	G6	6.782	F	I094	SB	387	0	-0.0168067	0	O
I001	G6_I115	G6	6.782	F	I099	AF	110.5	0	-0.00126069	0	O
I001	G6_I115	G6	6.782	F	I104	SAF	98.5	0	-0.0121516	0	O
I001	G6_I115	G6	6.782	F	I105	SB	181.5	0.0982429	0.10395	0	O
I001	G6_I115	G6	6.782	F	I112	AF	123.5	0.0205622	0.168575	0	O
I001	G6_I115	G6	6.782	F	I115	INF	125.5	-0.029703	-0.0359736	0	O
I001	G6_I115	G6	6.782	F	I118	SAF	107.5	0	0.0490196	0	O
I001	G6_I115	G6	6.782	F	I121	INF	110.5	0	0	0	O
I001	G6_I115	G6	6.782	F	I122	INF	101.5	0	0.0466667	0	O
I001	G6_I115	G6	6.782	F	I126	SB	122	-0.0171147	-0.0230422	0	O
I001	G6_I115	G6	6.782	F	I127	BB	137.5	0	-0.0239003	0	O
I001	G6_I115	G6	6.782	F	I135	SAM	109.5	0.0122031	0.0555193	0	O
I001	G6_I115	G6	6.782	F	I137	AF	125	0	0.0277778	0	O
I001	G6_I115	G6	6.782	F	I138	SAF	104	0	0.00645161	0	O
I001	G6_I115	G6	6.782	F	I140	AF	91.5	0	0	0	O
I001	G6_I115	G6	6.782	F	I141	AF	136.5	0	-0.0098541	0	O
I004	G9_I004	G9	2.91034	F	I018	JUV	384	-0.00573549	0.194163	0	O
I004	G9_I004	G9	2.91034	F	I048	SAF	386.5	0.00874608	0.101624	0	O
I004	G9_I004	G9	2.91034	F	I051	AF	450	0	0.0783983	0	O
I004	G9_I004	G9	2.91034	F	I130	JUV	410.5	0.0453496	0.197531	0	O
I004	G9_I004	G9	2.91034	F	I133	DSB	429	0.101918	0.176323	0	O
I004	G9_I004	G9	2.91034	F	I146	SB	420	-0.00877193	-0.00641161	0	O
I005	G5_I005	G5	6.38741	M	I030	JUV	282	-0.00551671	0.0164724	0	O
I005	G5_I005	G5	6.38741	M	I038	INF	276	0.0189641	0.111612	0	O
I005	G5_I005	G5	6.38741	M	I050	SAM	315	0.0295916	0.0819271	0	O
I005	G5_I005	G5	6.38741	M	I057	BB	294	-0.0303161	-0.00574713	0	O
I005	G5_I005	G5	6.38741	M	I064	AF	339	0	0.119934	0	O
I005	G5_I005	G5	6.38741	M	I065	AF	330	0	0.0564103	0	O
I005	G5_I005	G5	6.38741	M	I066	AF	315	-0.0116279	0.0980245	0	O
I005	G5_I005	G5	6.38741	M	I085	AF	312	0	0.0709596	0	O
I005	G5_I005	G5	6.38741	M	I090	SB	456	0	0.0891149	0	O
I005	G5_I005	G5	6.38741	M	I116	SB	339	0	0.0585659	0	O
I005	G5_I005	G5	6.38741	M	I117	AF	333	0	0.113805	0	O
I005	G5_I005	G5	6.38741	M	I132	JUV	288	-0.00103474	0.0855137	0	O
I005	G5_I005	G5	6.38741	M	I134	DSB	459	0.00793651	-0.0842823	0	O
I016	G7_I016	G7	4.03	F	I008	AF	134.5	0	0	0	O
I016	G7_I016	G7	4.03	F	I036	AF	146	0.0105263	-0.140557	0	O
I016	G7_I016	G7	4.03	F	I048	INF	136	-0.00980392	0.107843	0	O
I016	G7_I016	G7	4.03	F	I050	INF	140	0	0.0662651	0	O
I016	G7_I016	G7	4.03	F	I051	AF	192	0.00849673	-0.0588235	0	O
I016	G7_I016	G7	4.03	F	I053	AF	143	0	0.0597826	0	O
I016	G7_I016	G7	4.03	F	I056	AF	143	0	0.0263158	0	O
I016	G7_I016	G7	4.03	F	I057	INF	140	-0.0482328	-0.0604016	0	O
I016	G7_I016	G7	4.03	F	I060	JUV	148	-0.0421053	-0.0388583	0	O
I016	G7_I016	G7	4.03	F	I063	AF	140.5	0	0.0606419	0	O
I016	G7_I016	G7	4.03	F	I064	JUV	142.5	0.00558659	0.0167598	0	O
I016	G7_I016	G7	4.03	F	I065	AF	142	0	0.0478723	0	O
I016	G7_I016	G7	4.03	F	I066	JUV	140.5	0.0167598	0.0446927	0	O
I016	G7_I016	G7	4.03	F	I085	AF	160	0	0.00990099	0	O
I016	G7_I016	G7	4.03	F	I090	SB	334.5	0	-0.0140831	0	O
I016	G7_I016	G7	4.03	F	I097	AF	148.5	0	-0.058371	0	O
I016	G7_I016	G7	4.03	F	I110	DSB	423.5	0.0025641	-0.00273804	0	O
I016	G7_I016	G7	4.03	F	I116	BB	134.5	0	0.0300458	0	O
I016	G7_I016	G7	4.03	F	I117	AF	139.5	0	-0.019802	0	O
I016	G7_I016	G7	4.03	F	I133	SB	346	0.0220214	0.138554	0	O
I016	G7_I016	G7	4.03	F	I134	SB	158.5	0	-0.00833333	0	O
I016	G7_I016	G7	4.03	F	I142	SAF	143	0.0174419	0.0318237	0	O
I016	G7_I016	G7	4.03	F	I144	SB	158	0	-0.00757576	0	O
I016	G7_I016	G7	4.03	F	I146	SB	155.5	0	0.035533	0	O
I028	G2_I028	G2	4.85147	F	I009	DSB	372	0.0035461	0.0117896	0	O
I028	G2_I028	G2	4.85147	F	I015	AF	399	0	0.0694824	0	O
I028	G2_I028	G2	4.85147	F	I023	JUV	339	-0.0103755	0.092556	0	O
I028	G2_I028	G2	4.85147	F	I070	AF	450	0.00213675	0.207799	0	O
I028	G2_I028	G2	4.85147	F	I100	SAF	375	0.0274851	0.158368	0	O
I028	G2_I028	G2	4.85147	F	I102	SAM	348	-0.000770891	0.0651146	0	O
I029	G6_I037	G6	7.24709	M	I002	BB	90	0	0.05	0	O
I029	G6_I037	G6	7.24709	M	I007	AF	78	0	-0.166667	0	O
I029	G6_I037	G6	7.24709	M	I010	DSB	354	0	0.0139012	0	O
I029	G6_I037	G6	7.24709	M	I014	BB	81	0.00833333	-0.109524	0	O
I029	G6_I037	G6	7.24709	M	I017	INF	87	0	-0.0101852	0	O
I029	G6_I037	G6	7.24709	M	I019	SB	338.5	0	0.00465595	0	O
I029	G6_I037	G6	7.24709	M	I025	AF	105	0	0.0797101	0	O
I029	G6_I037	G6	7.24709	M	I031	INF	90	0	0.0132275	0	O
I029	G6_I037	G6	7.24709	M	I032	AF	102	0	0	0	O
I029	G6_I037	G6	7.24709	M	I037	INF	108	0	0.0153846	0	O
I029	G6_I037	G6	7.24709	M	I043	SB	81	0.00925926	0	0	O
I029	G6_I037	G6	7.24709	M	I045	INF	89	0	0.0476974	0	O
I029	G6_I037	G6	7.24709	M	I055	BB	89.5	0	0.0442478	0	O
I029	G6_I037	G6	7.24709	M	I062	SB	90	-0.0166667	-0.00833333	0	O
I029	G6_I037	G6	7.24709	M	I073	JUV	93	0	0.0395623	0	O
I029	G6_I037	G6	7.24709	M	I076	AF	117	-0.0666667	-0.0777778	0	O
I029	G6_I037	G6	7.24709	M	I080	AF	123	0	0.0179739	0	O
I029	G6_I037	G6	7.24709	M	I081	AF	114	0.0138889	0.0119048	0	O
I029	G6_I037	G6	7.24709	M	I084	INF	99	0	-0.0782609	0	O
I029	G6_I037	G6	7.24709	M	I086	INF	87	0.00793651	0.031746	0	O
I029	G6_I037	G6	7.24709	M	I088	SAF	78	0.00694444	0.106481	0	O
I029	G6_I037	G6	7.24709	M	I092	AF	102	0	-0.0138889	0	O
I029	G6_I037	G6	7.24709	M	I111	JUV	75	0	0.0477941	0	O
I029	G6_I037	G6	7.24709	M	I112	AF	102	0	-0.00277778	0	O
I029	G6_I037	G6	7.24709	M	I121	AF	96	0.0151515	0.104545	0	O
I029	G6_I037	G6	7.24709	M	I122	BB	84	-0.0185185	0.0672515	0	O
I029	G6_I037	G6	7.24709	M	I124	INF	93	0	-0.0795455	0	O
I029	G6_I037	G6	7.24709	M	I131	SAM	96	0.0322061	0.0901771	0	O
I029	G6_I037	G6	7.24709	M	I135	SB	96	-0.0333333	-0.0621212	0	O
I029	G6_I037	G6	7.24709	M	I148	INF	84	0	0.0333333	0	O
I030	G5_I030	G5	5.54141	F	I038	INF	279	-0.00353535	0.0209596	0	O
I030	G5_I030	G5	5.54141	F	I050	BB	273	-0.0507592	-0.173817	0	O
I030	G5_I030	G5	5.54141	F	I057	BB	273	0	-0.0697492	0	O
I030	G5_I030	G5	5.54141	F	I085	AF	294	-0.010101	-0.0485625	0	O
I030	G5_I030	G5	5.54141	F	I116	DSB	450	-0.00606061	0.0154705	0	O
I030	G5_I030	G5	5.54141	F	I117	AF	294	-0.0287993	-0.0756904	0	O
I030	G5_I030	G5	5.54141	F	I132	SAF	270	-0.0229634	0.0683434	0	O
I031	G6_I086	G6	4.96099	M	I002	BB	141	0	-0.0274758	0	O
I031	G6_I086	G6	4.96099	M	I010	DSB	546	0.0280899	0.0747856	0	O
I031	G6_I086	G6	4.96099	M	I014	BB	153	0	0.00666667	0	O
I031	G6_I086	G6	4.96099	M	I017	JUV	144	0	0.0694444	0	O
I031	G6_I086	G6	4.96099	M	I019	SB	495	0	0.0309342	0	O
I031	G6_I086	G6	4.96099	M	I025	AF	156	-0.00149925	-0.0994503	0	O
I031	G6_I086	G6	4.96099	M	I029	BB	156	0	0.00395062	0	O
I031	G6_I086	G6	4.96099	M	I032	AF	156	0	0.0288889	0	O
I031	G6_I086	G6	4.96099	M	I037	INF	159	0.02	0.152381	0	O
I031	G6_I086	G6	4.96099	M	I043	SB	144	0	-0.0162319	0	O
I031	G6_I086	G6	4.96099	M	I044	AF	159	0	0.00766284	0	O
I031	G6_I086	G6	4.96099	M	I045	JUV	138	-0.0184127	0.144762	0	O
I031	G6_I086	G6	4.96099	M	I062	SB	153	0	-0.00771605	0	O
I031	G6_I086	G6	4.96099	M	I073	SAM	147	0.0277778	0.0241667	0	O
I031	G6_I086	G6	4.96099	M	I076	AF	141	0	0.0407609	0	O
I031	G6_I086	G6	4.96099	M	I080	AF	159	0	0.019943	0	O
I031	G6_I086	G6	4.96099	M	I081	AF	150	0	0.0142244	0	O
I031	G6_I086	G6	4.96099	M	I084	JUV	144	-0.00782609	-0.0649275	0	O
I031	G6_I086	G6	4.96099	M	I086	INF	129	-0.0321068	0.0479798	0	O
I031	G6_I086	G6	4.96099	M	I092	AF	141	0	0.0259662	0	O
I031	G6_I086	G6	4.96099	M	I111	SAF	153	0.00641026	0.0720513	0	O
I031	G6_I086	G6	4.96099	M	I121	AF	285	0.0176768	0.069488	0	O
I031	G6_I086	G6	4.96099	M	I122	BB	150	-0.000534188	-0.0528846	0	O
I031	G6_I086	G6	4.96099	M	I124	JUV	138	0.0246212	0.0606061	0	O
I031	G6_I086	G6	4.96099	M	I131	BB	150	-0.00666667	0.06	0	O
I031	G6_I086	G6	4.96099	M	I148	INF	132	0.00757576	-0.0606061	0	O
I037	G6_I037	G6	2.705	F	I002	BB	102	0	-0.00505051	0	O
I037	G6_I037	G6	2.705	F	I007	AF	90	-0.0166667	-0.0333333	0	O
I037	G6_I037	G6	2.705	F	I010	DSB	366	-0.000920556	-0.0742889	0	O
I037	G6_I037	G6	2.705	F	I014	BB	93	0	0	0	O
I037	G6_I037	G6	2.705	F	I017	INF	99	0.0757576	0.371212	0	O
I037	G6_I037	G6	2.705	F	I019	SB	350.5	0.119149	0.483765	0	O
I037	G6_I037	G6	2.705	F	I025	AF	117	0	0.0604762	0	O
I037	G6_I037	G6	2.705	F	I029	SAM	108	0	0.0153846	0	O
I037	G6_I037	G6	2.705	F	I031	INF	102	0	0.0849802	0	O
I037	G6_I037	G6	2.705	F	I032	AF	114	0	-0.0505051	0	O
I037	G6_I037	G6	2.705	F	I043	SB	93	0	0	0	O
I037	G6_I037	G6	2.705	F	I045	INF	101	-0.00522139	-0.0574353	0	O
I037	G6_I037	G6	2.705	F	I055	BB	101.5	0	0	0	O
I037	G6_I037	G6	2.705	F	I062	SB	102	0	0	0	O
I037	G6_I037	G6	2.705	F	I073	JUV	105	0	0.0271465	0	O
I037	G6_I037	G6	2.705	F	I076	AF	129	0	0.102564	0	O
I037	G6_I037	G6	2.705	F	I080	AF	135	0	-0.0310391	0	O
I037	G6_I037	G6	2.705	F	I081	AF	126	0	0.0128205	0	O
I037	G6_I037	G6	2.705	F	I084	INF	111	0	0.0555556	0	O
I037	G6_I037	G6	2.705	F	I086	INF	99	-0.0166667	-0.0130435	0	O
I037	G6_I037	G6	2.705	F	I088	SAF	90	0	-0.0166667	0	O
I037	G6_I037	G6	2.705	F	I092	AF	114	0	0.248016	0	O
I037	G6_I037	G6	2.705	F	I111	JUV	87	0	0.0710526	0	O
I037	G6_I037	G6	2.705	F	I112	AF	114	0.00641026	0.0790598	0	O
I037	G6_I037	G6	2.705	F	I121	AF	108	0.0277778	0	0	O
I037	G6_I037	G6	2.705	F	I122	BB	96	0	0.047619	0	O
I037	G6_I037	G6	2.705	F	I124	INF	105	0.00757576	0.0629371	0	O
I037	G6_I037	G6	2.705	F	I131	SAM	108	0	-0.0151515	0	O
I037	G6_I037	G6	2.705	F	I135	SB	108	0	0	0	O
I037	G6_I037	G6	2.705	F	I148	INF	96	0	0.0969697	0	O
I041	G6_I115	G6	6.74333	M	I001	SAF	98.5	0.0146417	0.132814	0	O
I041	G6_I115	G6	6.74333	M	I002	INF	99	0.0150376	0.0776942	0	O
I041	G6_I115	G6	6.74333	M	I007	AF	122.5	0	0.0204785	0	O
I041	G6_I115	G6	6.74333	M	I010	DSB	386.5	0.00251256	-0.0139028	0	O
I041	G6_I115	G6	6.74333	M	I011	INF	90	-0.0104167	-0.0357143	0	O
I041	G6_I115	G6	6.74333	M	I012	AF	78	0	0	0	O
I041	G6_I115	G6	6.74333	M	I014	INF	96	-0.00980392	-0.0686275	0	O
I041	G6_I115	G6	6.74333	M	I015	SAF	75	0	0.0110294	0	O
I041	G6_I115	G6	6.74333	M	I019	BB	124.5	-0.0175439	-0.00272904	0	O
I041	G6_I115	G6	6.74333	M	I020	AF	77.5	-0.0913162	-0.117991	0	O
I041	G6_I115	G6	6.74333	M	I021	SB	129	0.00787402	0.00787402	0	O
I041	G6_I115	G6	6.74333	M	I022	AF	93	0	-0.0185185	0	O
I041	G6_I115	G6	6.74333	M	I024	BB	107	0	0.049505	0	O
I041	G6_I115	G6	6.74333	M	I025	AF	105.5	0	0.012973	0	O
I041	G6_I115	G6	6.74333	M	I040	AF	136.5	0	0.00892256	0	O
I041	G6_I115	G6	6.74333	M	I042	SB	180	0.00505051	0.0757576	0	O
I041	G6_I115	G6	6.74333	M	I043	JUV	97.5	0	0.114162	0	O
I041	G6_I115	G6	6.74333	M	I047	INF	101.5	0.0104167	-0.0248248	0	O
I041	G6_I115	G6	6.74333	M	I049	SAM	90	-0.0104167	-0.0342262	0	O
I041	G6_I115	G6	6.74333	M	I054	BB	95.5	0.0222222	0.0222222	0	O
I041	G6_I115	G6	6.74333	M	I055	JUV	102	0	-0.025463	0	O
I041	G6_I115	G6	6.74333	M	I061	SAM	93	-0.0263158	0.00438596	0	O
I041	G6_I115	G6	6.74333	M	I062	BB	102	0.00980392	0.00980392	0	O
I041	G6_I115	G6	6.74333	M	I069	SAM	89.5	-0.0709273	-0.066792	0	O
I041	G6_I115	G6	6.74333	M	I070	AF	81	0.0241228	0.128289	0	O
I041	G6_I115	G6	6.74333	M	I07I	AF	111	0	0.0485294	0	O
I041	G6_I115	G6	6.74333	M	I072	AF	77.5	0	0	0	O
I041	G6_I115	G6	6.74333	M	I076	AF	101.5	0	0.0421053	0	O
I041	G6_I115	G6	6.74333	M	I078	BB	112.5	0	-0.0105263	0	O
I041	G6_I115	G6	6.74333	M	I080	AF	104.5	-0.00990099	0.00861753	0	O
I041	G6_I115	G6	6.74333	M	I081	AF	110.5	0	-0.0100787	0	O
I041	G6_I115	G6	6.74333	M	I087	INF	92.5	0.0120482	-0.0106308	0	O
I041	G6_I115	G6	6.74333	M	I089	JUV	96	0	0.0104167	0	O
I041	G6_I115	G6	6.74333	M	I093	AF	97	0	0.00514626	0	O
I041	G6_I115	G6	6.74333	M	I094	SB	372.5	0	-0.00013702	0	O
I041	G6_I115	G6	6.74333	M	I099	AF	96	0	-0.0185185	0	O
I041	G6_I115	G6	6.74333	M	I104	SAF	84	0.0166667	0.0166667	0	O
I041	G6_I115	G6	6.74333	M	I105	SB	167	-0.0133333	-0.0345652	0	O
I041	G6_I115	G6	6.74333	M	I112	AF	109	0	0.0468977	0	O
I041	G6_I115	G6	6.74333	M	I115	INF	111	0	0.0107843	0	O
I041	G6_I115	G6	6.74333	M	I118	SAF	93	0.047619	0.0798319	0	O
I041	G6_I115	G6	6.74333	M	I121	INF	96	0	0.00718954	0	O
I041	G6_I115	G6	6.74333	M	I122	INF	87	-0.0111111	-0.0206349	0	O
I041	G6_I115	G6	6.74333	M	I126	SB	107.5	0	0	0	O
I041	G6_I115	G6	6.74333	M	I127	BB	123	0	-0.00358852	0	O
I041	G6_I115	G6	6.74333	M	I131	INF	65	0	0.0735867	0	O
I041	G6_I115	G6	6.74333	M	I135	SAM	95	-0.0196078	-0.00356506	0	O
I041	G6_I115	G6	6.74333	M	I137	AF	110.5	0.00840336	-0.035014	0	O
I041	G6_I115	G6	6.74333	M	I138	SAF	89.5	0.00318309	0.00292844	0	O
I041	G6_I115	G6	6.74333	M	I139	SB	150.5	0	-0.011583	0	O
I041	G6_I115	G6	6.74333	M	I140	AF	77	0	0	0	O
I041	G6_I115	G6	6.74333	M	I141	AF	122	0	0.00729927	0	O
I043	G6_I043	G6	5.65092	M	I001	SAF	102	-0.010101	0.0756133	0	O
I043	G6_I043	G6	5.65092	M	I002	INF	105.5	0.00900901	0.026036	0	O
I043	G6_I043	G6	5.65092	M	I007	AF	129	-0.00919287	-0.0139732	0	O
I043	G6_I043	G6	5.65092	M	I010	DSB	392	-0.00428266	-0.0189477	0	O
I043	G6_I043	G6	5.65092	M	I011	INF	96.5	-0.0113636	0.0838745	0	O
I043	G6_I043	G6	5.65092	M	I014	INF	99.5	-0.0263158	-0.0971331	0	O
I043	G6_I043	G6	5.65092	M	I019	BB	134	0	0.00305085	0	O
I043	G6_I043	G6	5.65092	M	I021	SB	135.5	0	0	0	O
I043	G6_I043	G6	5.65092	M	I024	BB	113.5	0	0.0445865	0	O
I043	G6_I043	G6	5.65092	M	I025	AF	112	0	0.0816327	0	O
I043	G6_I043	G6	5.65092	M	I040	AF	137	0	-0.023622	0	O
I043	G6_I043	G6	5.65092	M	I041	SAM	90.5	0	0.109017	0	O
I043	G6_I043	G6	5.65092	M	I042	SB	177.5	0	-0.0361446	0	O
I043	G6_I043	G6	5.65092	M	I047	INF	108	0	0	0	O
I043	G6_I043	G6	5.65092	M	I049	SAM	102.5	-0.0121951	0.0243902	0	O
I043	G6_I043	G6	5.65092	M	I054	BB	99	0.00813008	0.0284553	0	O
I043	G6_I043	G6	5.65092	M	I055	JUV	108.5	0	0	0	O
I043	G6_I043	G6	5.65092	M	I061	SAM	93.5	-0.0113636	-0.00250822	0	O
I043	G6_I043	G6	5.65092	M	I062	BB	111.5	0.010101	0.0669192	0	O
I043	G6_I043	G6	5.65092	M	I069	SAM	93.5	-0.0121951	0.032987	0	O
I043	G6_I043	G6	5.65092	M	I07I	AF	114.5	0	0.0845528	0	O
I043	G6_I043	G6	5.65092	M	I076	AF	108	0	0.0726065	0	O
I043	G6_I043	G6	5.65092	M	I078	BB	119	0	0.0164666	0	O
I043	G6_I043	G6	5.65092	M	I080	AF	111	0	0.00636943	0	O
I043	G6_I043	G6	5.65092	M	I081	AF	117	0	0.027027	0	O
I043	G6_I043	G6	5.65092	M	I087	JUV	102	0	0.0480769	0	O
I043	G6_I043	G6	5.65092	M	I089	JUV	96.5	0	-0.0241903	0	O
I043	G6_I043	G6	5.65092	M	I093	AF	97.5	0	0.0162602	0	O
I043	G6_I043	G6	5.65092	M	I094	SB	370	0	0.0136986	0	O
I043	G6_I043	G6	5.65092	M	I104	SAF	84.5	0	-0.0117647	0	O
I043	G6_I043	G6	5.65092	M	I105	SB	176.5	0	0.0266667	0	O
I043	G6_I043	G6	5.65092	M	I112	AF	115.5	0	-0.00274465	0	O
I043	G6_I043	G6	5.65092	M	I115	INF	111.5	0	0.0323289	0	O
I043	G6_I043	G6	5.65092	M	I118	SAF	96.5	0.0070922	-0.0326068	0	O
I043	G6_I043	G6	5.65092	M	I121	INF	99.5	0	0.0174687	0	O
I043	G6_I043	G6	5.65092	M	I122	INF	93.5	-0.0131579	-0.0413992	0	O
I043	G6_I043	G6	5.65092	M	I126	SB	105.5	0	-0.0560692	0	O
I043	G6_I043	G6	5.65092	M	I127	BB	129.5	0	0	0	O
I043	G6_I043	G6	5.65092	M	I135	SAM	101.5	-0.0340909	0	0	O
I043	G6_I043	G6	5.65092	M	I137	AF	117	0.0173913	0.0248024	0	O
I043	G6_I043	G6	5.65092	M	I138	SAF	90	-0.0119048	0.0282991	0	O
I043	G6_I043	G6	5.65092	M	I141	AF	122.5	0	-0.0520833	0	O
I048	G9_I004	G9	6.73238	F	I004	INF	386.5	-0.0177305	0	0	O
I048	G9_I004	G9	6.73238	F	I018	JUV	362.5	0.0214133	0.20492	0	O
I048	G9_I004	G9	6.73238	F	I051	AF	428.5	0	0.0251266	0	O
I048	G9_I004	G9	6.73238	F	I130	JUV	389	0.0421935	0.23174	0	O
I048	G9_I004	G9	6.73238	F	I133	DSB	407.5	0.00980614	0.168628	0	O
I048	G9_I004	G9	6.73238	F	I146	SB	398.5	0	-0.00959125	0	O
I052	G4_I052	G4	5.76591	M	I013	JUV	216	0.0467949	0.191026	0	O
I052	G4_I052	G4	5.76591	M	I027	SAF	225	-0.0339506	0.0229277	0	O
I052	G4_I052	G4	5.76591	M	I033	BB	222	-0.0115741	0.00462963	0	O
I052	G4_I052	G4	5.76591	M	I059	DSB	315	0.00356125	0.103039	0	O
I052	G4_I052	G4	5.76591	M	I075	AF	246	0	-0.00135102	0	O
I052	G4_I052	G4	5.76591	M	I095	INF	216	0.0418736	0.171632	0	O
I052	G4_I052	G4	5.76591	M	I103	JUV	201	0.0617647	0.104706	0	O
I052	G4_I052	G4	5.76591	M	I106	SAM	231	-0.0343691	-0.110483	0	O
I052	G4_I052	G4	5.76591	M	I118	AF	228	-0.00909091	0.0251082	0	O
I052	G4_I052	G4	5.76591	M	I119	BB	213	-0.0226046	-0.0345816	0	O
I052	G4_I052	G4	5.76591	M	I145	SB	324	-0.00617284	-0.162551	0	O
I055	G6_I055	G6	4.36413	M	I001	SAF	119.5	0	0.0186916	0	O
I055	G6_I055	G6	4.36413	M	I002	INF	123	0	0.061683	0	O
I055	G6_I055	G6	4.36413	M	I007	AF	143	0	0	0	O
I055	G6_I055	G6	4.36413	M	I010	DSB	343	-0.00170642	-0.0154128	0	O
I055	G6_I055	G6	4.36413	M	I011	INF	111	0	0.00353535	0	O
I055	G6_I055	G6	4.36413	M	I012	AF	123	0	0.0939542	0	O
I055	G6_I055	G6	4.36413	M	I014	INF	116.5	0	0.0111111	0	O
I055	G6_I055	G6	4.36413	M	I015	SAF	114	0.0168651	0.215278	0	O
I055	G6_I055	G6	4.36413	M	I019	BB	144	0	-0.00641026	0	O
I055	G6_I055	G6	4.36413	M	I020	AF	101.5	0	0	0	O
I055	G6_I055	G6	4.36413	M	I021	BB	140.5	0	0.00446104	0	O
I055	G6_I055	G6	4.36413	M	I022	AF	129	0	0	0	O
I055	G6_I055	G6	4.36413	M	I024	BB	119.5	-0.00694444	0.0633772	0	O
I055	G6_I055	G6	4.36413	M	I025	AF	126.5	0.026087	0.026087	0	O
I055	G6_I055	G6	4.36413	M	I040	AF	142.5	0	0.00775194	0	O
I055	G6_I055	G6	4.36413	M	I041	SAM	108	0	0.0295429	0	O
I055	G6_I055	G6	4.36413	M	I042	SB	174	0	0	0	O
I055	G6_I055	G6	4.36413	M	I043	JUV	122	-0.00641026	0.016317	0	O
I055	G6_I055	G6	4.36413	M	I047	INF	119.5	0	0.00177004	0	O
I055	G6_I055	G6	4.36413	M	I049	JUV	114	0	0.0333333	0	O
I055	G6_I055	G6	4.36413	M	I054	BB	116.5	0.00327994	0.00640732	0	O
I055	G6_I055	G6	4.36413	M	I061	JUV	117	0	0.0104167	0	O
I055	G6_I055	G6	4.36413	M	I062	BB	120	0	0.0185185	0	O
I055	G6_I055	G6	4.36413	M	I069	SAM	116.5	0	0.0238095	0	O
I055	G6_I055	G6	4.36413	M	I070	AF	116.5	0	0.0063689	0	O
I055	G6_I055	G6	4.36413	M	I07I	AF	138	0	-0.00641026	0	O
I055	G6_I055	G6	4.36413	M	I072	AF	110.5	0	0	0	O
I055	G6_I055	G6	4.36413	M	I076	AF	123	0	0	0	O
I055	G6_I055	G6	4.36413	M	I077	SB	128.5	0	0	0	O
I055	G6_I055	G6	4.36413	M	I078	BB	119.5	0.0224719	0.0207491	0	O
I055	G6_I055	G6	4.36413	M	I080	AF	125.5	0	0.101668	0	O
I055	G6_I055	G6	4.36413	M	I081	AF	135	0	0	0	O
I055	G6_I055	G6	4.36413	M	I087	INF	116.5	0	0.0111111	0	O
I055	G6_I055	G6	4.36413	M	I089	INF	111	0.0245726	0.0667735	0	O
I055	G6_I055	G6	4.36413	M	I091	AF	138	0	0.00757576	0	O
I055	G6_I055	G6	4.36413	M	I093	AF	131	0	0.00943396	0	O
I055	G6_I055	G6	4.36413	M	I094	SB	327.5	-0.000944028	0.101671	0	O
I055	G6_I055	G6	4.36413	M	I099	AF	132	0	0	0	O
I055	G6_I055	G6	4.36413	M	I104	SAF	125	0.0175439	0.0466976	0	O
I055	G6_I055	G6	4.36413	M	I105	BB	150	0	0.00793651	0	O
I055	G6_I055	G6	4.36413	M	I112	AF	133.5	0	0	0	O
I055	G6_I055	G6	4.36413	M	I115	INF	117	0	0.0111111	0	O
I055	G6_I055	G6	4.36413	M	I118	SAF	117	0	0	0	O
I055	G6_I055	G6	4.36413	M	I121	INF	114	0	0	0	O
I055	G6_I055	G6	4.36413	M	I122	INF	108	0	0.0333333	0	O
I055	G6_I055	G6	4.36413	M	I126	SB	116.5	0	-0.0387097	0	O
I055	G6_I055	G6	4.36413	M	I127	BB	129	0.00833333	-0.00615942	0	O
I055	G6_I055	G6	4.36413	M	I135	JUV	122	0	0.0425119	0	O
I055	G6_I055	G6	4.36413	M	I137	AF	135	0	0.01	0	O
I055	G6_I055	G6	4.36413	M	I138	SAF	117	0	0.0194175	0	O
I055	G6_I055	G6	4.36413	M	I139	SB	207.5	0	-0.017094	0	O
I055	G6_I055	G6	4.36413	M	I140	AF	113	0	0.02	0	O
I055	G6_I055	G6	4.36413	M	I141	AF	119.5	0	0.0654206	0	O
I069	G6_I087	G6	7.81109	M	I001	SAF	104.5	-0.019802	0.00476714	0	O
I069	G6_I087	G6	7.81109	M	I002	INF	105	0	0.0239651	0	O
I069	G6_I087	G6	7.81109	M	I007	AF	123	0	0.0277778	0	O
I069	G6_I087	G6	7.81109	M	I010	DSB	390	0	-0.00217553	0	O
I069	G6_I087	G6	7.81109	M	I011	INF	93	0.0104167	0.0715278	0	O
I069	G6_I087	G6	7.81109	M	I014	INF	99	0	0.0607769	0	O
I069	G6_I087	G6	7.81109	M	I019	BB	136.5	-0.0227273	-0.0175693	0	O
I069	G6_I087	G6	7.81109	M	I021	SB	138	0.00662252	0.0198675	0	O
I069	G6_I087	G6	7.81109	M	I024	BB	116	0	0.0129998	0	O
I069	G6_I087	G6	7.81109	M	I025	AF	108.5	0	-0.0258621	0	O
I069	G6_I087	G6	7.81109	M	I040	AF	133.5	0	-0.0218855	0	O
I069	G6_I087	G6	7.81109	M	I041	SAM	98.5	-0.0506743	-0.000632111	0	O
I069	G6_I087	G6	7.81109	M	I042	SB	171	0	0.080625	0	O
I069	G6_I087	G6	7.81109	M	I043	JUV	96.5	-0.0113636	0.106926	0	O
I069	G6_I087	G6	7.81109	M	I047	INF	101.5	0	-0.0560748	0	O
I069	G6_I087	G6	7.81109	M	I049	SAM	99	-0.00313283	-0.0313283	0	O
I069	G6_I087	G6	7.81109	M	I054	BB	95.5	0	0	0	O
I069	G6_I087	G6	7.81109	M	I055	JUV	102	0	0.00694444	0	O
I069	G6_I087	G6	7.81109	M	I061	SAM	105	-0.0104167	0.0564693	0	O
I069	G6_I087	G6	7.81109	M	I062	BB	105	-0.0196078	-0.0713508	0	O
I069	G6_I087	G6	7.81109	M	I07I	AF	114	0	0.0994318	0	O
I069	G6_I087	G6	7.81109	M	I076	AF	110.5	0	0.037957	0	O
I069	G6_I087	G6	7.81109	M	I078	BB	112.5	0	0	0	O
I069	G6_I087	G6	7.81109	M	I080	AF	104.5	0	0.0980392	0	O
I069	G6_I087	G6	7.81109	M	I081	AF	116.5	0	-0.00292529	0	O
I069	G6_I087	G6	7.81109	M	I087	JUV	98.5	-0.0350987	-0.0936656	0	O
I069	G6_I087	G6	7.81109	M	I089	JUV	102	0	0.015873	0	O
I069	G6_I087	G6	7.81109	M	I093	AF	91	-0.00847458	-0.0111229	0	O
I069	G6_I087	G6	7.81109	M	I094	SB	363.5	0	0.00765808	0	O
I069	G6_I087	G6	7.81109	M	I105	SB	167	0	0.00232523	0	O
I069	G6_I087	G6	7.81109	M	I112	AF	109	0	0	0	O
I069	G6_I087	G6	7.81109	M	I115	INF	108	0	-0.00833333	0	O
I069	G6_I087	G6	7.81109	M	I118	SAF	102	-0.0208333	-0.0138889	0	O
I069	G6_I087	G6	7.81109	M	I121	JUV	102	0	0.0490196	0	O
I069	G6_I087	G6	7.81109	M	I122	INF	104.5	-0.0238095	-0.039619	0	O
I069	G6_I087	G6	7.81109	M	I126	SB	99	0	0	0	O
I069	G6_I087	G6	7.81109	M	I127	BB	122.5	0	-0.009	0	O
I069	G6_I087	G6	7.81109	M	I131	INF	79	0.0430108	0.0889992	0	O
I069	G6_I087	G6	7.81109	M	I135	SAM	101	-0.00990099	0.029703	0	O
I069	G6_I087	G6	7.81109	M	I137	AF	107.5	0	0.0991228	0	O
I069	G6_I087	G6	7.81109	M	I138	SAF	86.5	-0.00970874	-0.0399445	0	O
I069	G6_I087	G6	7.81109	M	I141	AF	119	0	-0.0176991	0	O
I082	G3_I082	G3	4.59411	M	I006	AF	417	0.0181611	0.0196139	0	O
I082	G3_I082	G3	4.59411	M	I034	AF	408	-0.00578704	-0.0144676	0	O
I082	G3_I082	G3	4.59411	M	I042	DSB	420	0.137933	0.119915	0	O
I082	G3_I082	G3	4.59411	M	I046	AF	408	0.00520833	0.068287	0	O
I082	G3_I082	G3	4.59411	M	I054	SB	399	0	-0.00200666	0	O
I082	G3_I082	G3	4.59411	M	I058	INF	399	0.0748677	0.120899	0	O
I082	G3_I082	G3	4.59411	M	I074	AF	408	0.0251736	-0.0138889	0	O
I082	G3_I082	G3	4.59411	M	I083	AF	432	0.0158454	-0.135749	0	O
I082	G3_I082	G3	4.59411	M	I107	INF	407.5	0.051748	0.104551	0	O
I084	G6_I037	G6	3.19233	F	I002	BB	93	0	-0.0102339	0	O
I084	G6_I037	G6	3.19233	F	I007	AF	81	0	0.0617647	0	O
I084	G6_I037	G6	3.19233	F	I010	DSB	357	0.00735294	0.0424837	0	O
I084	G6_I037	G6	3.19233	F	I014	BB	84	0	-0.0185185	0	O
I084	G6_I037	G6	3.19233	F	I017	INF	90	0.0175439	0.107656	0	O
I084	G6_I037	G6	3.19233	F	I019	SB	341.5	0	0.0695809	0	O
I084	G6_I037	G6	3.19233	F	I025	AF	108	0	0.0367965	0	O
I084	G6_I037	G6	3.19233	F	I029	SAM	99	0	-0.0782609	0	O
I084	G6_I037	G6	3.19233	F	I031	INF	93	0.00151515	0.169697	0	O
I084	G6_I037	G6	3.19233	F	I032	AF	105	0	0.0486111	0	O
I084	G6_I037	G6	3.19233	F	I037	INF	111	0	0.0555556	0	O
I084	G6_I037	G6	3.19233	F	I043	SB	84	0	-0.00534759	0	O
I084	G6_I037	G6	3.19233	F	I045	INF	92	0	0.123294	0	O
I084	G6_I037	G6	3.19233	F	I055	BB	92.5	0	0	0	O
I084	G6_I037	G6	3.19233	F	I062	SB	93	0	0.0350877	0	O
I084	G6_I037	G6	3.19233	F	I073	JUV	96	0	0.002886	0	O
I084	G6_I037	G6	3.19233	F	I076	AF	120	0	0.0507246	0	O
I084	G6_I037	G6	3.19233	F	I080	AF	126	0	0.0636918	0	O
I084	G6_I037	G6	3.19233	F	I081	AF	117	0	0.00407609	0	O
I084	G6_I037	G6	3.19233	F	I086	INF	90	0	0.0833333	0	O
I084	G6_I037	G6	3.19233	F	I088	SAF	81	0	0.10098	0	O
I084	G6_I037	G6	3.19233	F	I092	AF	105	0	0.0198413	0	O
I084	G6_I037	G6	3.19233	F	I111	JUV	78	0.0104167	0.108333	0	O
I084	G6_I037	G6	3.19233	F	I112	AF	105	0	-0.0138889	0	O
I084	G6_I037	G6	3.19233	F	I121	AF	99	0.031746	0.0833333	0	O
I084	G6_I037	G6	3.19233	F	I122	BB	87	-0.0151515	-0.026936	0	O
I084	G6_I037	G6	3.19233	F	I124	INF	96	-0.0128205	0.0748988	0	O
I084	G6_I037	G6	3.19233	F	I131	SAM	99	0	0.0757576	0	O
I084	G6_I037	G6	3.19233	F	I135	SB	99	0	0.015873	0	O
I084	G6_I037	G6	3.19233	F	I148	INF	87	0.00877193	0.0552632	0	O
I086	G6_I086	G6	3.52088	F	I002	BB	138	-0.00666667	-0.113333	0	O
I086	G6_I086	G6	3.52088	F	I010	DSB	543	0.00205837	-0.0121668	0	O
I086	G6_I086	G6	3.52088	F	I014	BB	150	0	-0.0359635	0	O
I086	G6_I086	G6	3.52088	F	I017	JUV	141	-0.0190909	0.115758	0	O
I086	G6_I086	G6	3.52088	F	I019	SB	492	0.0372941	0.150371	0	O
I086	G6_I086	G6	3.52088	F	I025	AF	153	0.0185185	0.0231481	0	O
I086	G6_I086	G6	3.52088	F	I029	BB	153	0	-0.00336439	0	O
I086	G6_I086	G6	3.52088	F	I031	JUV	129	-0.0321068	0.0479798	0	O
I086	G6_I086	G6	3.52088	F	I032	AF	153	0.00666667	0.0353846	0	O
I086	G6_I086	G6	3.52088	F	I037	INF	156	0.0102449	0.216142	0	O
I086	G6_I086	G6	3.52088	F	I043	SB	141	0	-0.013587	0	O
I086	G6_I086	G6	3.52088	F	I044	AF	156	0.0185185	0.122469	0	O
I086	G6_I086	G6	3.52088	F	I045	JUV	135	-0.0158103	-0.00658762	0	O
I086	G6_I086	G6	3.52088	F	I062	SB	150	0	-0.0333333	0	O
I086	G6_I086	G6	3.52088	F	I073	SAM	144	-0.00407925	0.0402098	0	O
I086	G6_I086	G6	3.52088	F	I076	AF	138	0	0.030303	0	O
I086	G6_I086	G6	3.52088	F	I080	AF	156	0	0.0128968	0	O
I086	G6_I086	G6	3.52088	F	I081	AF	147	0	-0.00944444	0	O
I086	G6_I086	G6	3.52088	F	I084	JUV	141	0.0292874	0.163345	0	O
I086	G6_I086	G6	3.52088	F	I092	AF	138	0.00757576	0.0984848	0	O
I086	G6_I086	G6	3.52088	F	I111	SAF	150	0.00747863	0.0395299	0	O
I086	G6_I086	G6	3.52088	F	I121	AF	282	0.00520833	0.00486111	0	O
I086	G6_I086	G6	3.52088	F	I122	BB	147	0	-0.0244444	0	O
I086	G6_I086	G6	3.52088	F	I124	JUV	135	-0.0266667	-0.02	0	O
I086	G6_I086	G6	3.52088	F	I131	BB	147	0	0.0242475	0	O
I086	G6_I086	G6	3.52088	F	I148	INF	129	0.00217391	-0.120652	0	O
I087	G6_I087	G6	4.12047	F	I001	SAF	107	0	-0.0295444	0	O
I087	G6_I087	G6	4.12047	F	I002	INF	107.5	-0.0196078	-0.0224709	0	O
I087	G6_I087	G6	4.12047	F	I007	AF	125.5	-0.0151515	0.0293481	0	O
I087	G6_I087	G6	4.12047	F	I010	DSB	392.5	0	0.0299336	0	O
I087	G6_I087	G6	4.12047	F	I011	INF	95.5	-0.0144637	0.0126836	0	O
I087	G6_I087	G6	4.12047	F	I014	INF	101.5	0.008	0.0334359	0	O
I087	G6_I087	G6	4.12047	F	I019	BB	139	0	0.035401	0	O
I087	G6_I087	G6	4.12047	F	I021	SB	140.5	0	0	0	O
I087	G6_I087	G6	4.12047	F	I024	BB	118.5	0	0	0	O
I087	G6_I087	G6	4.12047	F	I025	AF	111	0	-0.00909091	0	O
I087	G6_I087	G6	4.12047	F	I040	AF	136	-0.0155039	0.0063967	0	O
I087	G6_I087	G6	4.12047	F	I041	SAM	101	-0.0128205	-0.028536	0	O
I087	G6_I087	G6	4.12047	F	I042	SB	173.5	0.0699927	0.154912	0	O
I087	G6_I087	G6	4.12047	F	I043	JUV	99	0	-0.06455	0	O
I087	G6_I087	G6	4.12047	F	I047	INF	104	0	-0.0313686	0	O
I087	G6_I087	G6	4.12047	F	I049	SAM	101.5	-0.025641	0.0335385	0	O
I087	G6_I087	G6	4.12047	F	I054	BB	98	0	0	0	O
I087	G6_I087	G6	4.12047	F	I055	JUV	104.5	0.00840336	0.00569561	0	O
I087	G6_I087	G6	4.12047	F	I061	SAM	107.5	0.024	0.0502222	0	O
I087	G6_I087	G6	4.12047	F	I062	BB	107.5	-0.03125	-0.0725665	0	O
I087	G6_I087	G6	4.12047	F	I069	SAM	98.5	-0.0350987	-0.0936656	0	O
I087	G6_I087	G6	4.12047	F	I07I	AF	116.5	0	0.00986501	0	O
I087	G6_I087	G6	4.12047	F	I076	AF	113	0	0.0338983	0	O
I087	G6_I087	G6	4.12047	F	I078	BB	115	0	0	0	O
I087	G6_I087	G6	4.12047	F	I080	AF	107	-0.019802	-0.0219048	0	O
I087	G6_I087	G6	4.12047	F	I081	AF	119	-0.015873	-0.0138889	0	O
I087	G6_I087	G6	4.12047	F	I089	JUV	104.5	0	0.0145985	0	O
I087	G6_I087	G6	4.12047	F	I093	AF	93.5	0	0.0221429	0	O
I087	G6_I087	G6	4.12047	F	I094	SB	366	0	0.00405557	0	O
I087	G6_I087	G6	4.12047	F	I105	SB	169.5	0	-0.015873	0	O
I087	G6_I087	G6	4.12047	F	I112	AF	111.5	0	0.0288663	0	O
I087	G6_I087	G6	4.12047	F	I115	INF	110.5	-0.0222222	0.100594	0	O
I087	G6_I087	G6	4.12047	F	I118	SAF	104.5	0	0.000280112	0	O
I087	G6_I087	G6	4.12047	F	I121	JUV	104.5	0	0.122327	0	O
I087	G6_I087	G6	4.12047	F	I122	INF	107	-0.0128205	-0.0309201	0	O
I087	G6_I087	G6	4.12047	F	I126	SB	101.5	0	0	0	O
I087	G6_I087	G6	4.12047	F	I127	BB	125	0	-0.0628225	0	O
I087	G6_I087	G6	4.12047	F	I131	INF	81.5	0	0.0215124	0	O
I087	G6_I087	G6	4.12047	F	I135	SAM	103.5	-0.0315789	-0.0484962	0	O
I087	G6_I087	G6	4.12047	F	I137	AF	110	0	0.030288	0	O
I087	G6_I087	G6	4.12047	F	I138	SAF	89	0	0.0040728	0	O
I087	G6_I087	G6	4.12047	F	I141	AF	121.5	0	-0.00934579	0	O
I089	G6_I089	G6	7.02259	M	I011	JUV	79	0.0102041	0.0408163	0	O
I089	G6_I089	G6	7.02259	M	I019	SB	77.5	0	-0.0151515	0	O
I089	G6_I089	G6	7.02259	M	I029	INF	79	0	0.019943	0	O
I089	G6_I089	G6	7.02259	M	I035	JUV	85	0	0.00407925	0	O
I089	G6_I089	G6	7.02259	M	I047	JUV	79	0	-0.0129252	0	O
I089	G6_I089	G6	7.02259	M	I049	BB	70	-0.0166667	-0.0458333	0	O
I089	G6_I089	G6	7.02259	M	I055	SAM	70	-0.0666667	-0.0625	0	O
I089	G6_I089	G6	7.02259	M	I07I	AF	102.5	0	0.0758621	0	O
I089	G6_I089	G6	7.02259	M	I073	INF	105.5	0	-0.0196078	0	O
I089	G6_I089	G6	7.02259	M	I079	INF	97	0	0.0102041	0	O
I089	G6_I089	G6	7.02259	M	I111	INF	75	0	0.0235294	0	O
I089	G6_I089	G6	7.02259	M	I112	AF	79	0	0.0204082	0	O
I089	G6_I089	G6	7.02259	M	I115	SAF	74.5	0.0240964	0.0481928	0	O
I089	G6_I089	G6	7.02259	M	I121	SAF	83.5	0	0.0239143	0	O
I089	G6_I089	G6	7.02259	M	I122	JUV	94	0	0.0272727	0	O
I089	G6_I089	G6	7.02259	M	I137	AF	101.5	0	-0.0224615	0	O
I100	G2_I100	G2	3.38946	F	I009	DSB	284.5	0.0277824	0.179225	0	O
I100	G2_I100	G2	3.38946	F	I015	AF	239.5	0	-0.0819251	0	O
I100	G2_I100	G2	3.38946	F	I023	INF	206.5	0.00796813	0.0729428	0	O
I100	G2_I100	G2	3.38946	F	I028	INF	233	-0.0357734	0.00643503	0	O
I100	G2_I100	G2	3.38946	F	I070	AF	266.5	0	-5.79357e-05	0	O
I100	G2_I100	G2	3.38946	F	I093	AF	260	0.00946372	-0.00842256	0	O
I100	G2_I100	G2	3.38946	F	I102	INF	263.5	0.0312453	0.144975	0	O
I102	G2_I102	G2	3.72621	M	I009	DSB	286	0.0740741	0.332133	0	O
I102	G2_I102	G2	3.72621	M	I015	AF	255.5	0.00961538	0.117881	0	O
I102	G2_I102	G2	3.72621	M	I020	AF	221	0	-0.130841	0	O
I102	G2_I102	G2	3.72621	M	I023	INF	214	-0.0115799	-0.00454759	0	O
I102	G2_I102	G2	3.72621	M	I028	INF	249.5	0.0302626	0.0976336	0	O
I102	G2_I102	G2	3.72621	M	I070	AF	277	-0.0133929	-0.120022	0	O
I102	G2_I102	G2	3.72621	M	I093	AF	267.5	0.0175439	0.0267703	0	O
I102	G2_I102	G2	3.72621	M	I100	INF	264	0.00862515	0.205451	0	O
I103	G4_I103	G4	3.21424	F	I013	INF	206	-0.00665703	0.0115136	0	O
I103	G4_I103	G4	3.21424	F	I027	INF	212	0.053095	0.106012	0	O
I103	G4_I103	G4	3.21424	F	I033	BB	213.5	-0.00458534	0.0339403	0	O
I103	G4_I103	G4	3.21424	F	I052	INF	209	-0.037738	0.0427223	0	O
I103	G4_I103	G4	3.21424	F	I059	DSB	320.5	0.236348	0.381978	0	O
I103	G4_I103	G4	3.21424	F	I075	AF	213.5	0.0133333	0.0518152	0	O
I103	G4_I103	G4	3.21424	F	I106	INF	212.5	-0.0122496	0.00650483	0	O
I103	G4_I103	G4	3.21424	F	I118	AF	221	0.00881057	0.0704846	0	O
I103	G4_I103	G4	3.21424	F	I119	SAM	203	0.00961538	0.0651224	0	O
I103	G4_I103	G4	3.21424	F	I136	AF	218	0.00440529	0.0161035	0	O
I103	G4_I103	G4	3.21424	F	I140	AF	221.5	0	-0.0353535	0	O
I103	G4_I103	G4	3.21424	F	I145	SB	305	0	0.00821687	0	O
I106	G4_I106	G4	5.48118	M	I013	JUV	230.5	0.00540898	0.184483	0	O
I106	G4_I106	G4	5.48118	M	I027	JUV	260.5	0.0100281	0.0948015	0	O
I106	G4_I106	G4	5.48118	M	I033	BB	257	0.0346821	0.100468	0	O
I106	G4_I106	G4	5.48118	M	I052	JUV	230.5	-0.0145601	0.0645444	0	O
I106	G4_I106	G4	5.48118	M	I059	DSB	368.5	-0.0062495	0.00880324	0	O
I106	G4_I106	G4	5.48118	M	I075	AF	260	0	0.0608766	0	O
I106	G4_I106	G4	5.48118	M	I095	INF	200.5	0.0258501	0.113671	0	O
I106	G4_I106	G4	5.48118	M	I103	JUV	233.5	0.0122608	0.0998107	0	O
I106	G4_I106	G4	5.48118	M	I118	AF	257.5	0.00283286	0.0631273	0	O
I106	G4_I106	G4	5.48118	M	I119	BB	266.5	0.00782826	-0.0420229	0	O
I106	G4_I106	G4	5.48118	M	I136	AF	263.5	-0.00555556	0.0776337	0	O
I106	G4_I106	G4	5.48118	M	I145	SB	368.5	0.0780361	0.21811	0	O
I108	G8_I108	G8	4.9117	M	I098	BB	332	0.021575	0.0655598	0	O
I108	G8_I108	G8	4.9117	M	I101	DSB	409.5	-0.0012689	0.0481077	0	O
I108	G8_I108	G8	4.9117	M	I123	BB	329	0.00062991	-0.0357937	0	O
I108	G8_I108	G8	4.9117	M	I141	AF	302	0.0133333	0.0107018	0	O
I108	G8_I108	G8	4.9117	M	I143	BB	329	0.0160455	0.0632764	0	O
I114	G1_I114	G1	4.45996	F	I006	AF	110.5	0	0.157192	0	O
I114	G1_I114	G1	4.45996	F	I033	INF	119	-0.00847458	-0.118785	0	O
I114	G1_I114	G1	4.45996	F	I034	JUV	117	-0.008	0.0712661	0	O
I114	G1_I114	G1	4.45996	F	I051	AF	105	-0.00840336	-0.0588235	0	O
I114	G1_I114	G1	4.45996	F	I059	SB	159	0	-0.00885179	0	O
I114	G1_I114	G1	4.45996	F	I067	SB	515.5	-0.0150212	-0.0752917	0	O
I114	G1_I114	G1	4.45996	F	I075	AF	113.5	0	-0.0373832	0	O
I114	G1_I114	G1	4.45996	F	I096	AF	109	0	0.0122689	0	O
I114	G1_I114	G1	4.45996	F	I098	SAM	113.5	0.0185185	0.153284	0	O
I114	G1_I114	G1	4.45996	F	I108	INF	104	-0.0131579	-0.148325	0	O
I114	G1_I114	G1	4.45996	F	I109	AF	119.5	0	0.00812836	0	O
I114	G1_I114	G1	4.45996	F	I113	SAF	111	0.00804551	-0.0612759	0	O
I114	G1_I114	G1	4.45996	F	I119	INF	119.5	-0.00934579	-0.149533	0	O
I114	G1_I114	G1	4.45996	F	I120	DSB	499	0.0792151	0.0344001	0	O
I114	G1_I114	G1	4.45996	F	I123	BB	107.5	-0.00736824	0.0505374	0	O
I114	G1_I114	G1	4.45996	F	I125	AF	118.5	0	-0.0249964	0	O
I114	G1_I114	G1	4.45996	F	I129	SB	129	0	-0.0534351	0	O
I114	G1_I114	G1	4.45996	F	I136	AF	107.5	0	-0.151754	0	O
I114	G1_I114	G1	4.45996	F	I140	AF	156	0	-0.0446927	0	O
I114	G1_I114	G1	4.45996	F	I143	JUV	111	0	-0.00260057	0	O
I114	G1_I114	G1	4.45996	F	I145	SB	155.5	0	-0.0157895	0	O
I115	G6_I115	G6	3.35113	F	I001	SAF	125.5	0.0982429	0.10395	0	O
I115	G6_I115	G6	3.35113	F	I002	INF	126	0	0.0439394	0	O
I115	G6_I115	G6	3.35113	F	I007	AF	149.5	0	0.0384615	0	O
I115	G6_I115	G6	3.35113	F	I010	DSB	413.5	-0.00978661	0.000247166	0	O
I115	G6_I115	G6	3.35113	F	I011	INF	117	0.00534759	0.0102496	0	O
I115	G6_I115	G6	3.35113	F	I012	AF	105	0	-0.0345395	0	O
I115	G6_I115	G6	3.35113	F	I014	INF	123	0.00724638	0.0623994	0	O
I115	G6_I115	G6	3.35113	F	I015	SAF	#REF!	0	0.0104167	0	O
I115	G6_I115	G6	3.35113	F	I019	BB	151.5	0	0.00806011	0	O
I115	G6_I115	G6	3.35113	F	I020	AF	#REF!	-0.00884956	-0.079646	0	O
I115	G6_I115	G6	3.35113	F	I021	SB	156	0.0285714	0.04	0	O
I115	G6_I115	G6	3.35113	F	I022	AF	120	0	0.047619	0	O
I115	G6_I115	G6	3.35113	F	I024	BB	134	0	-0.0336134	0	O
I115	G6_I115	G6	3.35113	F	I025	AF	132.5	0	-0.0103373	0	O
I115	G6_I115	G6	3.35113	F	I040	AF	163.5	0.00938967	0.0922906	0	O
I115	G6_I115	G6	3.35113	F	I041	SAM	111	0	0.0107843	0	O
I115	G6_I115	G6	3.35113	F	I042	SB	207	0	0.0365854	0	O
I115	G6_I115	G6	3.35113	F	I043	JUV	124.5	-0.0105579	-0.0511601	0	O
I115	G6_I115	G6	3.35113	F	I047	INF	128.5	0	-0.0525442	0	O
I115	G6_I115	G6	3.35113	F	I049	SAM	117	0	-0.0142602	0	O
I115	G6_I115	G6	3.35113	F	I054	BB	122.5	0.00724638	0.0434783	0	O
I115	G6_I115	G6	3.35113	F	I055	JUV	129	0.0208333	0.0537281	0	O
I115	G6_I115	G6	3.35113	F	I061	SAM	120	0	0.0166667	0	O
I115	G6_I115	G6	3.35113	F	I062	BB	129	0.00666667	0.06	0	O
I115	G6_I115	G6	3.35113	F	I069	SAM	116.5	0	0.00817582	0	O
I115	G6_I115	G6	3.35113	F	I07I	AF	138	0	0.0376984	0	O
I115	G6_I115	G6	3.35113	F	I072	AF	104.5	0	-0.049505	0	O
I115	G6_I115	G6	3.35113	F	I076	AF	128.5	0	0.0192001	0	O
I115	G6_I115	G6	3.35113	F	I078	BB	139.5	0.00561798	0.0617978	0	O
I115	G6_I115	G6	3.35113	F	I080	AF	131.5	0	0.0227055	0	O
I115	G6_I115	G6	3.35113	F	I081	AF	137.5	0	0.0493081	0	O
I115	G6_I115	G6	3.35113	F	I087	INF	119.5	-0.00162567	0.0480633	0	O
I115	G6_I115	G6	3.35113	F	I089	JUV	123	0.0208333	0.0106209	0	O
I115	G6_I115	G6	3.35113	F	I093	AF	124	0	-0.0405405	0	O
I115	G6_I115	G6	3.35113	F	I094	SB	399.5	0.0391504	0.0918699	0	O
I115	G6_I115	G6	3.35113	F	I099	AF	123	-0.00877193	0.0127592	0	O
I115	G6_I115	G6	3.35113	F	I104	SAF	111	0	0	0	O
I115	G6_I115	G6	3.35113	F	I105	SB	194	0.0818966	0.204907	0	O
I115	G6_I115	G6	3.35113	F	I112	AF	136	-0.0317667	-0.0642923	0	O
I115	G6_I115	G6	3.35113	F	I118	SAF	120	-0.0016835	0.0345118	0	O
I115	G6_I115	G6	3.35113	F	I121	INF	123	-0.0208333	0.0766667	0	O
I115	G6_I115	G6	3.35113	F	I122	INF	114	-0.03125	-0.0823864	0	O
I115	G6_I115	G6	3.35113	F	I126	SB	134.5	0	0.0448718	0	O
I115	G6_I115	G6	3.35113	F	I127	BB	150	0	-0.0166667	0	O
I115	G6_I115	G6	3.35113	F	I135	SAM	122	0	-0.0277778	0	O
I115	G6_I115	G6	3.35113	F	I137	AF	137.5	0	-0.0261699	0	O
I115	G6_I115	G6	3.35113	F	I138	SAF	116.5	0	-0.0408148	0	O
I115	G6_I115	G6	3.35113	F	I140	AF	104	0	0	0	O
I115	G6_I115	G6	3.35113	F	I141	AF	149	0	-0.0098541	0	O
I116	G7_I116	G7	5.03	M	I003	SB	138	0	0	0	O
I116	G7_I116	G7	5.03	M	I026	SB	146.5	0	0	0	O
I116	G7_I116	G7	5.03	M	I036	INF	127.5	0	-0.0296024	0	O
I116	G7_I116	G7	5.03	M	I039	SB	140.5	0	0	0	O
I116	G7_I116	G7	5.03	M	I053	SAF	134.5	0.00877193	-0.0049236	0	O
I116	G7_I116	G7	5.03	M	I056	AF	144	0	0.0879078	0	O
I116	G7_I116	G7	5.03	M	I063	SAF	134.5	0	0.00973154	0	O
I116	G7_I116	G7	5.03	M	I065	AF	155.5	0	0.0575269	0	O
I116	G7_I116	G7	5.03	M	I068	AF	133.5	0	0.0187123	0	O
I116	G7_I116	G7	5.03	M	I085	AF	140.5	0	0.0437316	0	O
I116	G7_I116	G7	5.03	M	I090	DSB	144.5	0	-0.0305344	0	O
I116	G7_I116	G7	5.03	M	I097	AF	143.5	0	-0.0201857	0	O
I116	G7_I116	G7	5.03	M	I110	SB	162	0	-0.0407603	0	O
I116	G7_I116	G7	5.03	M	I117	INF	149.5	0	-0.0124224	0	O
I116	G7_I116	G7	5.03	M	I128	BB	146	0	0.02	0	O
I116	G7_I116	G7	5.03	M	I133	SB	158.5	0	0.0246914	0	O
I116	G7_I116	G7	5.03	M	I134	SB	145	0	0.0306978	0	O
I116	G7_I116	G7	5.03	M	I142	INF	138.5	0	-0.0424423	0	O
I116	G7_I116	G7	5.03	M	I144	SB	154.5	0	-0.0310559	0	O
I116	G7_I116	G7	5.03	M	I146	BB	128.5	0.00833333	-0.0532238	0	O
I116	G7_I116	G7	5.03	M	I147	AF	146	0	0.0266667	0	O
I118	G6_I115	G6	7.21697	F	I001	SAF	107.5	0.0205622	0.168575	0	O
I118	G6_I115	G6	7.21697	F	I002	INF	108	0	0.0208333	0	O
I118	G6_I115	G6	7.21697	F	I007	AF	131.5	0	0.0263403	0	O
I118	G6_I115	G6	7.21697	F	I010	DSB	395.5	0	0.0463415	0	O
I118	G6_I115	G6	7.21697	F	I011	INF	99	0	0.0318627	0	O
I118	G6_I115	G6	7.21697	F	I012	AF	87	0	0	0	O
I118	G6_I115	G6	7.21697	F	I014	INF	105	0	0.000544663	0	O
I118	G6_I115	G6	7.21697	F	I015	SAF	84	0	0.0166667	0	O
I118	G6_I115	G6	7.21697	F	I019	BB	133.5	-0.0166667	0.0037415	0	O
I118	G6_I115	G6	7.21697	F	I020	AF	86.5	0	-0.0265487	0	O
I118	G6_I115	G6	7.21697	F	I021	SB	138	0	0.00719425	0	O
I118	G6_I115	G6	7.21697	F	I022	AF	102	0	-0.0526316	0	O
I118	G6_I115	G6	7.21697	F	I024	BB	116	0	0.0353982	0	O
I118	G6_I115	G6	7.21697	F	I025	AF	114.5	0	0	0	O
I118	G6_I115	G6	7.21697	F	I040	AF	145.5	0	0.0169492	0	O
I118	G6_I115	G6	7.21697	F	I041	SAM	93	0.047619	0.0798319	0	O
I118	G6_I115	G6	7.21697	F	I042	SB	189	0	0.0166667	0	O
I118	G6_I115	G6	7.21697	F	I043	JUV	106.5	0	0.0236917	0	O
I118	G6_I115	G6	7.21697	F	I047	INF	110.5	-0.00884956	-0.00762045	0	O
I118	G6_I115	G6	7.21697	F	I049	SAM	99	0	0.0128676	0	O
I118	G6_I115	G6	7.21697	F	I054	BB	104.5	0	-0.00934579	0	O
I118	G6_I115	G6	7.21697	F	I055	JUV	111	0	0	0	O
I118	G6_I115	G6	7.21697	F	I061	SAM	102	0	-0.0261905	0	O
I118	G6_I115	G6	7.21697	F	I062	BB	111	0	-0.0214425	0	O
I118	G6_I115	G6	7.21697	F	I069	SAM	98.5	0.000515677	0.00206271	0	O
I118	G6_I115	G6	7.21697	F	I070	AF	90	0	-0.00833333	0	O
I118	G6_I115	G6	7.21697	F	I07I	AF	120	-0.00925926	0.00420875	0	O
I118	G6_I115	G6	7.21697	F	I072	AF	86.5	0	-0.0495049	0	O
I118	G6_I115	G6	7.21697	F	I076	AF	110.5	0	0.020987	0	O
I118	G6_I115	G6	7.21697	F	I078	BB	121.5	0	0.0055083	0	O
I118	G6_I115	G6	7.21697	F	I080	AF	113.5	0	0.0166667	0	O
I118	G6_I115	G6	7.21697	F	I081	AF	119.5	0	-0.0446316	0	O
I118	G6_I115	G6	7.21697	F	I087	INF	101.5	0	0.0353801	0	O
I118	G6_I115	G6	7.21697	F	I089	JUV	105	0	0	0	O
I118	G6_I115	G6	7.21697	F	I094	SB	381.5	0	-0.000171956	0	O
I118	G6_I115	G6	7.21697	F	I099	AF	105	0	0.00328947	0	O
I118	G6_I115	G6	7.21697	F	I104	SAF	93	0	0	0	O
I118	G6_I115	G6	7.21697	F	I105	SB	176	-0.00641026	-0.0103349	0	O
I118	G6_I115	G6	7.21697	F	I112	AF	118	0	0.00796928	0	O
I118	G6_I115	G6	7.21697	F	I115	INF	120	-0.0016835	0.0345118	0	O
I118	G6_I115	G6	7.21697	F	I121	INF	105	0	0.0350877	0	O
I118	G6_I115	G6	7.21697	F	I122	INF	96	0	-0.0104167	0	O
I118	G6_I115	G6	7.21697	F	I126	SB	116.5	0	0	0	O
I118	G6_I115	G6	7.21697	F	I127	BB	132	0	0.0263889	0	O
I118	G6_I115	G6	7.21697	F	I131	INF	74	0	0.0181818	0	O
I118	G6_I115	G6	7.21697	F	I135	SAM	104	0	0.04	0	O
I118	G6_I115	G6	7.21697	F	I137	AF	119.5	0	-0.00325134	0	O
I118	G6_I115	G6	7.21697	F	I138	SAF	98.5	0.0449438	0.142738	0	O
I118	G6_I115	G6	7.21697	F	I139	SB	159.5	0	-0.00377358	0	O
I118	G6_I115	G6	7.21697	F	I140	AF	86	0	0.00200114	0	O
I118	G6_I115	G6	7.21697	F	I141	AF	131	0	0.0134228	0	O
I121	G6_I121	G6	3.8987	F	I001	SAF	107.5	-0.029703	-0.0342192	0	O
I121	G6_I121	G6	3.8987	F	I002	INF	111	0	0.0423977	0	O
I121	G6_I121	G6	3.8987	F	I007	AF	134.5	0	0.0564991	0	O
I121	G6_I121	G6	3.8987	F	I010	DSB	394.5	0.0302334	0.256196	0	O
I121	G6_I121	G6	3.8987	F	I011	INF	102	0	0.0426901	0	O
I121	G6_I121	G6	3.8987	F	I014	INF	108	0.0238095	0.0507937	0	O
I121	G6_I121	G6	3.8987	F	I019	BB	136.5	0	0.0125786	0	O
I121	G6_I121	G6	3.8987	F	I021	SB	141	0	0	0	O
I121	G6_I121	G6	3.8987	F	I024	BB	119	0	0	0	O
I121	G6_I121	G6	3.8987	F	I025	AF	120.5	0	0.0337565	0	O
I121	G6_I121	G6	3.8987	F	I040	AF	148.5	0.00606061	0.0757576	0	O
I121	G6_I121	G6	3.8987	F	I041	SAM	96	0	0.00718954	0	O
I121	G6_I121	G6	3.8987	F	I042	SB	186	0	-0.0243243	0	O
I121	G6_I121	G6	3.8987	F	I043	JUV	103.5	0	-0.0316081	0	O
I121	G6_I121	G6	3.8987	F	I047	INF	116.5	0.00757576	0.255851	0	O
I121	G6_I121	G6	3.8987	F	I049	SAM	102	0	-0.0119048	0	O
I121	G6_I121	G6	3.8987	F	I054	BB	107.5	0	0	0	O
I121	G6_I121	G6	3.8987	F	I055	JUV	114	0	0	0	O
I121	G6_I121	G6	3.8987	F	I061	SAM	108	-0.00925926	-0.0277778	0	O
I121	G6_I121	G6	3.8987	F	I062	BB	117	0	0.0185688	0	O
I121	G6_I121	G6	3.8987	F	I069	SAM	102	0	0.0583333	0	O
I121	G6_I121	G6	3.8987	F	I07I	AF	126	-0.00793651	-0.031746	0	O
I121	G6_I121	G6	3.8987	F	I076	AF	113.5	0	0.0478525	0	O
I121	G6_I121	G6	3.8987	F	I078	BB	121.5	0	-0.0120482	0	O
I121	G6_I121	G6	3.8987	F	I080	AF	113.5	0	0.00833333	0	O
I121	G6_I121	G6	3.8987	F	I081	AF	125.5	0	0.269735	0	O
I121	G6_I121	G6	3.8987	F	I087	INF	107.5	0	0.0768889	0	O
I121	G6_I121	G6	3.8987	F	I089	JUV	108	0	0	0	O
I121	G6_I121	G6	3.8987	F	I093	AF	106	0	0.00450281	0	O
I121	G6_I121	G6	3.8987	F	I094	SB	378.5	0	0.00287356	0	O
I121	G6_I121	G6	3.8987	F	I099	AF	108	0	-0.0335498	0	O
I121	G6_I121	G6	3.8987	F	I104	SAF	93	0	0	0	O
I121	G6_I121	G6	3.8987	F	I105	SB	179	0	-0.0258783	0	O
I121	G6_I121	G6	3.8987	F	I112	AF	118	0	0.00318771	0	O
I121	G6_I121	G6	3.8987	F	I115	INF	120	-0.0222222	0.108889	0	O
I121	G6_I121	G6	3.8987	F	I118	SAF	105	0	0.0333333	0	O
I121	G6_I121	G6	3.8987	F	I122	INF	102	0	0.0952381	0	O
I121	G6_I121	G6	3.8987	F	I126	SB	113.5	0	0	0	O
I121	G6_I121	G6	3.8987	F	I127	BB	132	0	0.00666667	0	O
I121	G6_I121	G6	3.8987	F	I135	SAM	107	0	0.0120072	0	O
I121	G6_I121	G6	3.8987	F	I137	AF	122.5	0	0.0556667	0	O
I121	G6_I121	G6	3.8987	F	I138	SAF	98.5	-0.0111111	0.00633437	0	O
I121	G6_I121	G6	3.8987	F	I141	AF	134	0	0	0	O
I130	G9_I004	G9	5.90828	M	I004	INF	410.5	0.0453496	0.197531	0	O
I130	G9_I004	G9	5.90828	M	I018	JUV	386.5	-0.00236526	-0.0130299	0	O
I130	G9_I004	G9	5.90828	M	I048	SAF	389	0.0421935	0.23174	0	O
I130	G9_I004	G9	5.90828	M	I051	AF	452.5	0	-0.00221765	0	O
I130	G9_I004	G9	5.90828	M	I133	DSB	431.5	0.0423647	0.116867	0	O
I130	G9_I004	G9	5.90828	M	I146	SB	422.5	0	-0.00708088	0	O
I002	G6_I115	G6	2.705	M	I007	AF	140.5	-0.0258065	0.162366	0	NO
I002	G6_I115	G6	2.705	M	I010	DSB	404.5	-0.00254453	0.0783777	0	NO
I002	G6_I115	G6	2.705	M	I011	INF	108	0.00493421	0.0548246	0	NO
I002	G6_I115	G6	2.705	M	I012	AF	96	0	0.0676638	0	NO
I002	G6_I115	G6	2.705	M	I014	INF	114	0.00980392	0.0127451	0	NO
I002	G6_I115	G6	2.705	M	I015	SAF	93	0	-0.00833333	0	NO
I002	G6_I115	G6	2.705	M	I019	BB	142.5	0	0.00680272	0	NO
I002	G6_I115	G6	2.705	M	I020	AF	95.5	0	-0.008	0	NO
I002	G6_I115	G6	2.705	M	I021	SB	147	0	-0.0134228	0	NO
I002	G6_I115	G6	2.705	M	I022	AF	111	0	-0.0238095	0	NO
I002	G6_I115	G6	2.705	M	I024	BB	125	0	0.0265487	0	NO
I002	G6_I115	G6	2.705	M	I025	AF	123.5	0	0.0303156	0	NO
I002	G6_I115	G6	2.705	M	I040	AF	154.5	0	0.0112994	0	NO
I002	G6_I115	G6	2.705	M	I042	SB	198	-0.00555556	0.0031746	0	NO
I002	G6_I115	G6	2.705	M	I047	INF	119.5	0.021037	0.151481	0	NO
I002	G6_I115	G6	2.705	M	I049	SAM	108	0.0208333	0.0641447	0	NO
I002	G6_I115	G6	2.705	M	I061	SAM	111	-0.00757576	-0.00757576	0	NO
I002	G6_I115	G6	2.705	M	I062	BB	120	0	0.000877193	0	NO
I002	G6_I115	G6	2.705	M	I07I	AF	129	0	-0.0174242	0	NO
I002	G6_I115	G6	2.705	M	I072	AF	95.5	0	0.0416667	0	NO
I002	G6_I115	G6	2.705	M	I076	AF	119.5	0	-0.00370865	0	NO
I002	G6_I115	G6	2.705	M	I078	BB	130.5	0	0.0140845	0	NO
I002	G6_I115	G6	2.705	M	I080	Mother	122.5	0.0151961	0.146289	1	NO
I002	G6_I115	G6	2.705	M	I081	AF	128.5	0	0.016	0	NO
I002	G6_I115	G6	2.705	M	I089	JUV	114	-0.00877193	-0.0350877	0	NO
I002	G6_I115	G6	2.705	M	I093	AF	115	0	0	0	NO
I002	G6_I115	G6	2.705	M	I094	SB	390.5	0	-0.00305768	0	NO
I002	G6_I115	G6	2.705	M	I099	AF	114	0	0.0128968	0	NO
I002	G6_I115	G6	2.705	M	I104	SAF	102	0	-0.0238095	0	NO
I002	G6_I115	G6	2.705	M	I105	SB	185	0	-0.00085034	0	NO
I002	G6_I115	G6	2.705	M	I112	AF	127	0	0.0209452	0	NO
I002	G6_I115	G6	2.705	M	I122	INF	105	0.0474537	0.0706019	0	NO
I002	G6_I115	G6	2.705	M	I126	SB	125.5	0	0	0	NO
I002	G6_I115	G6	2.705	M	I127	BB	141	0	0.0138889	0	NO
I002	G6_I115	G6	2.705	M	I135	SAM	113	0	0.0416667	0	NO
I002	G6_I115	G6	2.705	M	I137	AF	128.5	0	0.0367684	0	NO
I002	G6_I115	G6	2.705	M	I138	SAF	107.5	0	0.00290262	0	NO
I002	G6_I115	G6	2.705	M	I140	AF	95	0	-0.0169492	0	NO
I002	G6_I115	G6	2.705	M	I141	AF	140	0	-0.008	0	NO
I011	G6_I115	G6	2.825	M	I002	INF	105	0.00493421	0.0548246	0	NO
I011	G6_I115	G6	2.825	M	I007	AF	128.5	0	0.0427007	0	NO
I011	G6_I115	G6	2.825	M	I010	DSB	392.5	0.00243902	0.160488	0	NO
I011	G6_I115	G6	2.825	M	I012	AF	84	0	0	0	NO
I011	G6_I115	G6	2.825	M	I014	INF	102	-0.0294118	-0.0882353	0	NO
I011	G6_I115	G6	2.825	M	I015	SAF	81	0	0	0	NO
I011	G6_I115	G6	2.825	M	I019	BB	130.5	0	0.00483351	0	NO
I011	G6_I115	G6	2.825	M	I020	AF	83.5	0	-0.0560748	0	NO
I011	G6_I115	G6	2.825	M	I021	SB	135	0	0	0	NO
I011	G6_I115	G6	2.825	M	I022	AF	99	0	0.0555556	0	NO
I011	G6_I115	G6	2.825	M	I024	BB	113	0	0.00884956	0	NO
I011	G6_I115	G6	2.825	M	I025	AF	111.5	0	-0.00032175	0	NO
I011	G6_I115	G6	2.825	M	I040	AF	142.5	0	-0.0200879	0	NO
I011	G6_I115	G6	2.825	M	I042	SB	186	0	-0.0199295	0	NO
I011	G6_I115	G6	2.825	M	I047	INF	107.5	-0.00017307	0.0916407	0	NO
I011	G6_I115	G6	2.825	M	I049	SAM	96	-0.0104167	-0.0729167	0	NO
I011	G6_I115	G6	2.825	M	I061	SAM	99	-0.037594	0.114662	0	NO
I011	G6_I115	G6	2.825	M	I062	BB	108	-0.00980392	-0.0392157	0	NO
I011	G6_I115	G6	2.825	M	I07I	Mother	117	0.0574866	0.257576	1	NO
I011	G6_I115	G6	2.825	M	I072	AF	83.5	0	-0.0210526	0	NO
I011	G6_I115	G6	2.825	M	I076	AF	107.5	0	0.00951886	0	NO
I011	G6_I115	G6	2.825	M	I078	BB	118.5	0	-0.0105263	0	NO
I011	G6_I115	G6	2.825	M	I080	AF	110.5	0	0.0234323	0	NO
I011	G6_I115	G6	2.825	M	I081	AF	116.5	0	0.0484444	0	NO
I011	G6_I115	G6	2.825	M	I089	JUV	102	0	-0.0208333	0	NO
I011	G6_I115	G6	2.825	M	I093	AF	103	0	0.0101232	0	NO
I011	G6_I115	G6	2.825	M	I094	SB	378.5	0	-0.0110193	0	NO
I011	G6_I115	G6	2.825	M	I099	AF	102	0	-0.00810185	0	NO
I011	G6_I115	G6	2.825	M	I104	SAF	90	0	0	0	NO
I011	G6_I115	G6	2.825	M	I105	SB	173	0	-0.00156463	0	NO
I011	G6_I115	G6	2.825	M	I112	AF	115	0	-0.0406504	0	NO
I011	G6_I115	G6	2.825	M	I122	INF	93	0.0826389	0.161806	0	NO
I011	G6_I115	G6	2.825	M	I126	SB	113.5	0	0	0	NO
I011	G6_I115	G6	2.825	M	I127	BB	129	0.00694444	0.0409357	0	NO
I011	G6_I115	G6	2.825	M	I135	SAM	101	0	0.0303922	0	NO
I011	G6_I115	G6	2.825	M	I137	AF	116.5	0	-0.0261188	0	NO
I011	G6_I115	G6	2.825	M	I138	SAF	95.5	0	0.103988	0	NO
I011	G6_I115	G6	2.825	M	I140	AF	83	0	0	0	NO
I011	G6_I115	G6	2.825	M	I141	AF	128	0	0	0	NO
I014	G6_I115	G6	3.619	M	I002	INF	111	0.00980392	0.0127451	0	NO
I014	G6_I115	G6	3.619	M	I007	AF	134.5	0	0	0	NO
I014	G6_I115	G6	3.619	M	I010	DSB	398.5	0.00240385	0.0340703	0	NO
I014	G6_I115	G6	3.619	M	I011	INF	102	-0.0294118	-0.0882353	0	NO
I014	G6_I115	G6	3.619	M	I012	AF	90	0	0	0	NO
I014	G6_I115	G6	3.619	M	I015	SAF	87	-0.00925926	-0.0185185	0	NO
I014	G6_I115	G6	3.619	M	I019	BB	136.5	-0.00833333	0.0236928	0	NO
I014	G6_I115	G6	3.619	M	I020	AF	89.5	0	-0.0265487	0	NO
I014	G6_I115	G6	3.619	M	I021	SB	141	0	0.0275862	0	NO
I014	G6_I115	G6	3.619	M	I022	AF	105	0	-0.00877193	0	NO
I014	G6_I115	G6	3.619	M	I024	BB	119	0.00840336	0.0504202	0	NO
I014	G6_I115	G6	3.619	M	I025	AF	117.5	0	-0.00854701	0	NO
I014	G6_I115	G6	3.619	M	I040	Mother	148.5	0.0398332	0.275093	1	NO
I014	G6_I115	G6	3.619	M	I042	SB	192	0	0	0	NO
I014	G6_I115	G6	3.619	M	I047	INF	113.5	0	-0.000621022	0	NO
I014	G6_I115	G6	3.619	M	I049	SAM	102	0.00980392	0.0196078	0	NO
I014	G6_I115	G6	3.619	M	I061	SAM	105	0	-0.00277778	0	NO
I014	G6_I115	G6	3.619	M	I062	BB	114	0.0231481	0.164815	0	NO
I014	G6_I115	G6	3.619	M	I07I	AF	123	0	-0.0245572	0	NO
I014	G6_I115	G6	3.619	M	I072	AF	89.5	0	0	0	NO
I014	G6_I115	G6	3.619	M	I076	AF	113.5	0	-0.0086943	0	NO
I014	G6_I115	G6	3.619	M	I078	BB	124.5	0.00675676	0.0846936	0	NO
I014	G6_I115	G6	3.619	M	I080	AF	116.5	0	-0.00934579	0	NO
I014	G6_I115	G6	3.619	M	I081	AF	122.5	0.00763359	0.0446632	0	NO
I014	G6_I115	G6	3.619	M	I089	JUV	108	0.0614035	0.140351	0	NO
I014	G6_I115	G6	3.619	M	I093	AF	109	0	-0.0202703	0	NO
I014	G6_I115	G6	3.619	M	I094	SB	384.5	0	0.0525	0	NO
I014	G6_I115	G6	3.619	M	I099	AF	108	0	-0.0779154	0	NO
I014	G6_I115	G6	3.619	M	I104	SAF	96	0	0	0	NO
I014	G6_I115	G6	3.619	M	I105	SB	179	0	0.0194846	0	NO
I014	G6_I115	G6	3.619	M	I112	AF	121	0	0.0143377	0	NO
I014	G6_I115	G6	3.619	M	I122	INF	99	0	-0.0422794	0	NO
I014	G6_I115	G6	3.619	M	I126	SB	119.5	0	0.031746	0	NO
I014	G6_I115	G6	3.619	M	I127	BB	135	0	0.0116667	0	NO
I014	G6_I115	G6	3.619	M	I135	SAM	107	-0.00925926	0.00995807	0	NO
I014	G6_I115	G6	3.619	M	I137	AF	122.5	0	0.00533928	0	NO
I014	G6_I115	G6	3.619	M	I138	SAF	101.5	0	-0.0265107	0	NO
I014	G6_I115	G6	3.619	M	I140	AF	89	0	0	0	NO
I014	G6_I115	G6	3.619	M	I141	AF	134	0	0.0258065	0	NO
I015	G6_I115	G6	6.308	F	I002	INF	90	0	-0.00833333	0	NO
I015	G6_I115	G6	6.308	F	I007	AF	113.5	0	0	0	NO
I015	G6_I115	G6	6.308	F	I010	DSB	377.5	0	-0.00257555	0	NO
I015	G6_I115	G6	6.308	F	I011	INF	81	0	0	0	NO
I015	G6_I115	G6	6.308	F	I012	Mother	69	-0.00595238	-0.00297619	1	NO
I015	G6_I115	G6	6.308	F	I014	INF	87	-0.00925926	-0.0185185	0	NO
I015	G6_I115	G6	6.308	F	I019	BB	115.5	0	0	0	NO
I015	G6_I115	G6	6.308	F	I020	AF	68.5	0	-0.0265487	0	NO
I015	G6_I115	G6	6.308	F	I021	SB	120	0.0121182	-0.0853235	0	NO
I015	G6_I115	G6	6.308	F	I022	AF	84	0	0.037037	0	NO
I015	G6_I115	G6	6.308	F	I024	BB	98	0	0.0221543	0	NO
I015	G6_I115	G6	6.308	F	I025	AF	96.5	0	0	0	NO
I015	G6_I115	G6	6.308	F	I040	AF	127.5	0	-0.00167973	0	NO
I015	G6_I115	G6	6.308	F	I042	SB	171	0	0.0114943	0	NO
I015	G6_I115	G6	6.308	F	I047	INF	92.5	0	0.0277778	0	NO
I015	G6_I115	G6	6.308	F	I049	SAM	81	0	0	0	NO
I015	G6_I115	G6	6.308	F	I061	SAM	84	0	-0.00833333	0	NO
I015	G6_I115	G6	6.308	F	I062	BB	93	0	-0.00569801	0	NO
I015	G6_I115	G6	6.308	F	I07I	AF	102	0	-0.0185185	0	NO
I015	G6_I115	G6	6.308	F	I072	AF	68.5	0	-0.00990099	0	NO
I015	G6_I115	G6	6.308	F	I076	AF	92.5	0	-0.00345935	0	NO
I015	G6_I115	G6	6.308	F	I078	BB	103.5	-0.019802	-0.03017	0	NO
I015	G6_I115	G6	6.308	F	I080	AF	95.5	0	0.0739875	0	NO
I015	G6_I115	G6	6.308	F	I081	AF	101.5	0	0	0	NO
I015	G6_I115	G6	6.308	F	I089	JUV	87	-0.00980392	-0.0212418	0	NO
I015	G6_I115	G6	6.308	F	I093	AF	88	0	0	0	NO
I015	G6_I115	G6	6.308	F	I094	SB	363.5	-0.00542005	-0.0227249	0	NO
I015	G6_I115	G6	6.308	F	I099	AF	87	0	-0.00877193	0	NO
I015	G6_I115	G6	6.308	F	I104	SAF	75	-0.00877193	-0.0248538	0	NO
I015	G6_I115	G6	6.308	F	I105	SB	158	0	0	0	NO
I015	G6_I115	G6	6.308	F	I112	AF	100	0	-0.00775194	0	NO
I015	G6_I115	G6	6.308	F	I122	INF	78	0	0.0666667	0	NO
I015	G6_I115	G6	6.308	F	I126	SB	98.5	0	-0.0176991	0	NO
I015	G6_I115	G6	6.308	F	I127	BB	114	0	0	0	NO
I015	G6_I115	G6	6.308	F	I135	SAM	86	0	0	0	NO
I015	G6_I115	G6	6.308	F	I137	AF	101.5	0	-0.00925926	0	NO
I015	G6_I115	G6	6.308	F	I138	SAF	80.5	0	0.0754717	0	NO
I015	G6_I115	G6	6.308	F	I140	AF	68	0	-0.0377358	0	NO
I015	G6_I115	G6	6.308	F	I141	AF	113	0	0	0	NO
I047	G6_I115	G6	2.505	F	I002	INF	116.5	0.021037	0.151481	0	NO
I047	G6_I115	G6	2.505	F	I007	AF	140	0	0.0454545	0	NO
I047	G6_I115	G6	2.505	F	I010	DSB	404	0.006888	0.0669646	0	NO
I047	G6_I115	G6	2.505	F	I011	INF	107.5	-0.00017307	0.0916407	0	NO
I047	G6_I115	G6	2.505	F	I012	AF	95.5	0	0.0111111	0	NO
I047	G6_I115	G6	2.505	F	I014	INF	113.5	0	-0.000621022	0	NO
I047	G6_I115	G6	2.505	F	I015	SAF	92.5	0	0.0277778	0	NO
I047	G6_I115	G6	2.505	F	I019	BB	142	0	-0.0194214	0	NO
I047	G6_I115	G6	2.505	F	I020	AF	95	0	-0.059322	0	NO
I047	G6_I115	G6	2.505	F	I021	SB	146.5	0	0	0	NO
I047	G6_I115	G6	2.505	F	I022	AF	110.5	0	-0.0168067	0	NO
I047	G6_I115	G6	2.505	F	I024	BB	124.5	0	0.008	0	NO
I047	G6_I115	G6	2.505	F	I025	AF	123	0	0.0234003	0	NO
I047	G6_I115	G6	2.505	F	I040	AF	154	0	-0.0323685	0	NO
I047	G6_I115	G6	2.505	F	I042	SB	197.5	0	0.0354372	0	NO
I047	G6_I115	G6	2.505	F	I049	SAM	107.5	0	-0.0282105	0	NO
I047	G6_I115	G6	2.505	F	I061	SAM	110.5	-0.032	-0.0463333	0	NO
I047	G6_I115	G6	2.505	F	I062	BB	119.5	0	-0.00091305	0	NO
I047	G6_I115	G6	2.505	F	I07I	AF	128.5	0	-0.0215093	0	NO
I047	G6_I115	G6	2.505	F	I072	AF	95	0	-0.0754717	0	NO
I047	G6_I115	G6	2.505	F	I076	AF	119	-0.0252101	-0.0420168	0	NO
I047	G6_I115	G6	2.505	F	I078	BB	130	0	0	0	NO
I047	G6_I115	G6	2.505	F	I080	AF	122	0	0.0186688	0	NO
I047	G6_I115	G6	2.505	F	I081	Mother	128	-0.00858738	0.0239833	1	NO
I047	G6_I115	G6	2.505	F	I089	JUV	113.5	0	0	0	NO
I047	G6_I115	G6	2.505	F	I093	AF	114.5	0	0	0	NO
I047	G6_I115	G6	2.505	F	I094	SB	390	0	-0.00823213	0	NO
I047	G6_I115	G6	2.505	F	I099	AF	113.5	0	-0.0226424	0	NO
I047	G6_I115	G6	2.505	F	I104	SAF	101.5	0	0	0	NO
I047	G6_I115	G6	2.505	F	I105	SB	184.5	0	-0.00280698	0	NO
I047	G6_I115	G6	2.505	F	I112	AF	126.5	0.0252101	-0.00928132	0	NO
I047	G6_I115	G6	2.505	F	I122	INF	104.5	0.0239274	0.167583	0	NO
I047	G6_I115	G6	2.505	F	I126	SB	125	0	0	0	NO
I047	G6_I115	G6	2.505	F	I127	BB	140.5	0	0	0	NO
I047	G6_I115	G6	2.505	F	I135	SAM	112.5	0	0.0271018	0	NO
I047	G6_I115	G6	2.505	F	I137	AF	128	0	-0.00228975	0	NO
I047	G6_I115	G6	2.505	F	I138	SAF	107	-0.0884956	-0.015421	0	NO
I047	G6_I115	G6	2.505	F	I140	AF	94.5	0	-0.018018	0	NO
I047	G6_I115	G6	2.505	F	I141	AF	139.5	0	0.00621118	0	NO
I049	G6_I115	G6	6.138	M	I002	INF	105	0.0208333	0.0641447	0	NO
I049	G6_I115	G6	6.138	M	I007	AF	128.5	0	-0.0125304	0	NO
I049	G6_I115	G6	6.138	M	I010	DSB	392.5	0	-0.0131707	0	NO
I049	G6_I115	G6	6.138	M	I011	INF	96	-0.0104167	-0.0729167	0	NO
I049	G6_I115	G6	6.138	M	I012	AF	84	0	0.0017094	0	NO
I049	G6_I115	G6	6.138	M	I014	INF	102	0.00980392	0.0196078	0	NO
I049	G6_I115	G6	6.138	M	I015	SAF	81	0	0	0	NO
I049	G6_I115	G6	6.138	M	I019	BB	130.5	0.00680272	0.00966702	0	NO
I049	G6_I115	G6	6.138	M	I020	AF	83.5	0	-0.0373832	0	NO
I049	G6_I115	G6	6.138	M	I021	SB	135	0	0	0	NO
I049	G6_I115	G6	6.138	M	I022	AF	99	0	0	0	NO
I049	G6_I115	G6	6.138	M	I024	BB	113	0	0	0	NO
I049	G6_I115	G6	6.138	M	I025	AF	111.5	0	0.0357143	0	NO
I049	G6_I115	G6	6.138	M	I040	AF	142.5	0	0.0169492	0	NO
I049	G6_I115	G6	6.138	M	I042	SB	186	-0.00617284	-0.0227513	0	NO
I049	G6_I115	G6	6.138	M	I047	INF	107.5	0	-0.0282105	0	NO
I049	G6_I115	G6	6.138	M	I061	SAM	99	0.0388471	0.075188	0	NO
I049	G6_I115	G6	6.138	M	I062	BB	108	0.0175439	0.0428277	0	NO
I049	G6_I115	G6	6.138	M	I07I	AF	117	0	0.00534759	0	NO
I049	G6_I115	G6	6.138	M	I072	AF	83.5	0	0.0450292	0	NO
I049	G6_I115	G6	6.138	M	I076	AF	107.5	0	0.0187781	0	NO
I049	G6_I115	G6	6.138	M	I078	BB	118.5	0	-0.0140104	0	NO
I049	G6_I115	G6	6.138	M	I080	AF	110.5	0	0	0	NO
I049	G6_I115	G6	6.138	M	I081	AF	116.5	0	0.024	0	NO
I049	G6_I115	G6	6.138	M	I089	JUV	102	-0.0208333	-0.00231481	0	NO
I049	G6_I115	G6	6.138	M	I093	AF	103	0	0.00858275	0	NO
I049	G6_I115	G6	6.138	M	I094	SB	378.5	0	0.0147949	0	NO
I049	G6_I115	G6	6.138	M	I099	AF	102	0	-0.0185185	0	NO
I049	G6_I115	G6	6.138	M	I104	SAF	90	-0.00925926	-0.00462963	0	NO
I049	G6_I115	G6	6.138	M	I105	SB	173	-0.00666667	-0.00666667	0	NO
I049	G6_I115	G6	6.138	M	I112	AF	115	0	0	0	NO
I049	G6_I115	G6	6.138	M	I122	INF	93	0	-0.0229167	0	NO
I049	G6_I115	G6	6.138	M	I126	SB	113.5	0	0	0	NO
I049	G6_I115	G6	6.138	M	I127	BB	129	0	-0.0105994	0	NO
I049	G6_I115	G6	6.138	M	I135	SAM	101	-0.0294118	-0.00921569	0	NO
I049	G6_I115	G6	6.138	M	I137	Mother	116.5	-0.099087	0.071172	1	NO
I049	G6_I115	G6	6.138	M	I138	SAF	95.5	-0.00980392	0.0042961	0	NO
I049	G6_I115	G6	6.138	M	I140	AF	83	0	0	0	NO
I049	G6_I115	G6	6.138	M	I141	AF	128	0	0.0201342	0	NO
I061	G6_I115	G6	6.144	M	I002	INF	108	-0.00757576	-0.00757576	0	NO
I061	G6_I115	G6	6.144	M	I007	AF	131.5	0	0.0305854	0	NO
I061	G6_I115	G6	6.144	M	I010	DSB	395.5	0.00992239	0.00905929	0	NO
I061	G6_I115	G6	6.144	M	I011	INF	99	-0.037594	0.114662	0	NO
I061	G6_I115	G6	6.144	M	I012	AF	87	0	0.0151515	0	NO
I061	G6_I115	G6	6.144	M	I014	INF	105	0	-0.00277778	0	NO
I061	G6_I115	G6	6.144	M	I015	SAF	84	0	-0.00833333	0	NO
I061	G6_I115	G6	6.144	M	I019	BB	133.5	0	0.00723906	0	NO
I061	G6_I115	G6	6.144	M	I020	AF	86.5	0	-0.064	0	NO
I061	G6_I115	G6	6.144	M	I021	SB	138	0	0	0	NO
I061	G6_I115	G6	6.144	M	I022	AF	102	0	0.004884	0	NO
I061	G6_I115	G6	6.144	M	I024	BB	116	0	0.00990099	0	NO
I061	G6_I115	G6	6.144	M	I025	AF	114.5	0	-0.0310078	0	NO
I061	G6_I115	G6	6.144	M	I040	AF	145.5	0	-0.0116883	0	NO
I061	G6_I115	G6	6.144	M	I042	SB	189	0	-0.000505051	0	NO
I061	G6_I115	G6	6.144	M	I047	INF	110.5	-0.032	-0.0463333	0	NO
I061	G6_I115	G6	6.144	M	I049	SAM	99	0.0388471	0.075188	0	NO
I061	G6_I115	G6	6.144	M	I062	BB	111	-0.00833333	-0.0137255	0	NO
I061	G6_I115	G6	6.144	M	I07I	Mother	120	0.05	0.183333	1	NO
I061	G6_I115	G6	6.144	M	I072	AF	86.5	0	0.0244838	0	NO
I061	G6_I115	G6	6.144	M	I076	AF	110.5	0	0.0105263	0	NO
I061	G6_I115	G6	6.144	M	I078	BB	121.5	0	0	0	NO
I061	G6_I115	G6	6.144	M	I080	AF	113.5	0	0.0286337	0	NO
I061	G6_I115	G6	6.144	M	I081	AF	119.5	0	-0.015873	0	NO
I061	G6_I115	G6	6.144	M	I089	JUV	105	0.0104167	0.0208333	0	NO
I061	G6_I115	G6	6.144	M	I093	AF	106	0	0.0192308	0	NO
I061	G6_I115	G6	6.144	M	I094	SB	381.5	0	0.00520812	0	NO
I061	G6_I115	G6	6.144	M	I099	AF	105	0	-0.0436508	0	NO
I061	G6_I115	G6	6.144	M	I104	SAF	93	0	0	0	NO
I061	G6_I115	G6	6.144	M	I105	SB	176	-0.00595238	0.0207039	0	NO
I061	G6_I115	G6	6.144	M	I112	AF	118	0	-0.0141844	0	NO
I061	G6_I115	G6	6.144	M	I122	INF	96	0	-0.0462963	0	NO
I061	G6_I115	G6	6.144	M	I126	SB	116.5	0	0	0	NO
I061	G6_I115	G6	6.144	M	I127	BB	132	-0.0151515	0.0984848	0	NO
I061	G6_I115	G6	6.144	M	I135	SAM	104	0	0.0318182	0	NO
I061	G6_I115	G6	6.144	M	I137	AF	119.5	0	0.0254202	0	NO
I061	G6_I115	G6	6.144	M	I138	SAF	98.5	-0.00833333	-0.049026	0	NO
I061	G6_I115	G6	6.144	M	I140	AF	86	0	0	0	NO
I061	G6_I115	G6	6.144	M	I141	AF	131	0	0.0145985	0	NO
I089	G6_I115	G6	4.11	M	I002	INF	111	-0.00877193	-0.0350877	0	NO
I089	G6_I115	G6	4.11	M	I007	AF	134.5	0	0.00785225	0	NO
I089	G6_I115	G6	4.11	M	I010	DSB	398.5	0.00236967	0.013921	0	NO
I089	G6_I115	G6	4.11	M	I011	INF	102	0	-0.0208333	0	NO
I089	G6_I115	G6	4.11	M	I012	AF	90	0	0	0	NO
I089	G6_I115	G6	4.11	M	I014	INF	108	0.0614035	0.140351	0	NO
I089	G6_I115	G6	4.11	M	I015	SAF	87	-0.00980392	-0.0212418	0	NO
I089	G6_I115	G6	4.11	M	I019	BB	136.5	0	0	0	NO
I089	G6_I115	G6	4.11	M	I020	AF	89.5	0	0	0	NO
I089	G6_I115	G6	4.11	M	I021	SB	141	0	0.00818968	0	NO
I089	G6_I115	G6	4.11	M	I022	AF	105	0	0.0294118	0	NO
I089	G6_I115	G6	4.11	M	I024	BB	119	-0.00969912	0.0432566	0	NO
I089	G6_I115	G6	4.11	M	I025	AF	117.5	0	-0.00900901	0	NO
I089	G6_I115	G6	4.11	M	I040	AF	148.5	0	0.0529101	0	NO
I089	G6_I115	G6	4.11	M	I042	SB	192	0	0	0	NO
I089	G6_I115	G6	4.11	M	I047	INF	113.5	0	0	0	NO
I089	G6_I115	G6	4.11	M	I049	SAM	102	-0.0208333	-0.00231481	0	NO
I089	G6_I115	G6	4.11	M	I061	SAM	105	0.0104167	0.0208333	0	NO
I089	G6_I115	G6	4.11	M	I062	BB	114	0.0238095	0.047619	0	NO
I089	G6_I115	G6	4.11	M	I07I	AF	123	0	0	0	NO
I089	G6_I115	G6	4.11	M	I072	AF	89.5	0	0	0	NO
I089	G6_I115	G6	4.11	M	I076	AF	113.5	0	0	0	NO
I089	G6_I115	G6	4.11	M	I078	BB	124.5	-0.00403281	0.0342447	0	NO
I089	G6_I115	G6	4.11	M	I080	AF	116.5	0	0.00757576	0	NO
I089	G6_I115	G6	4.11	M	I081	AF	122.5	0	0	0	NO
I089	G6_I115	G6	4.11	M	I093	AF	109	0	-0.00704225	0	NO
I089	G6_I115	G6	4.11	M	I094	SB	384.5	-0.00667671	0.0719103	0	NO
I089	G6_I115	G6	4.11	M	I099	AF	108	0	-0.00925926	0	NO
I089	G6_I115	G6	4.11	M	I104	SAF	96	-0.015873	-0.0502646	0	NO
I089	G6_I115	G6	4.11	M	I105	SB	179	0.00961538	0.0432692	0	NO
I089	G6_I115	G6	4.11	M	I112	AF	121	0	-0.00813008	0	NO
I089	G6_I115	G6	4.11	M	I122	INF	99	0	0	0	NO
I089	G6_I115	G6	4.11	M	I126	SB	119.5	0	0.00580572	0	NO
I089	G6_I115	G6	4.11	M	I127	BB	135	0	0	0	NO
I089	G6_I115	G6	4.11	M	I135	SAM	107	0	-0.00980392	0	NO
I089	G6_I115	G6	4.11	M	I137	AF	122.5	0	0.041958	0	NO
I089	G6_I115	G6	4.11	M	I138	SAF	101.5	0	0	0	NO
I089	G6_I115	G6	4.11	M	I140	AF	89	0	-0.04	0	NO
I089	G6_I115	G6	4.11	M	I141	Mother	134	-0.00667557	0.206885	1	NO
I104	G6_I115	G6	7.296	F	I002	INF	99	0	-0.0238095	0	NO
I104	G6_I115	G6	7.296	F	I007	AF	122.5	0	-0.00971756	0	NO
I104	G6_I115	G6	7.296	F	I010	DSB	386.5	0	0.00259067	0	NO
I104	G6_I115	G6	7.296	F	I011	INF	90	0	0	0	NO
I104	G6_I115	G6	7.296	F	I012	AF	78	0	-0.00980392	0	NO
I104	G6_I115	G6	7.296	F	I014	INF	96	0	0	0	NO
I104	G6_I115	G6	7.296	F	I015	SAF	75	-0.00877193	-0.0248538	0	NO
I104	G6_I115	G6	7.296	F	I019	BB	124.5	0	-0.015873	0	NO
I104	G6_I115	G6	7.296	F	I020	AF	77.5	0	0	0	NO
I104	G6_I115	G6	7.296	F	I021	SB	129	0	0.00869565	0	NO
I104	G6_I115	G6	7.296	F	I022	AF	93	0	-0.00833333	0	NO
I104	G6_I115	G6	7.296	F	I024	BB	107	-0.00476404	-0.0382921	0	NO
I104	G6_I115	G6	7.296	F	I025	AF	105.5	0	0	0	NO
I104	G6_I115	G6	7.296	F	I040	AF	136.5	0	0	0	NO
I104	G6_I115	G6	7.296	F	I042	SB	180	0	-0.00611791	0	NO
I104	G6_I115	G6	7.296	F	I047	INF	101.5	0	0	0	NO
I104	G6_I115	G6	7.296	F	I049	SAM	90	-0.00925926	-0.00462963	0	NO
I104	G6_I115	G6	7.296	F	I061	SAM	93	0	0	0	NO
I104	G6_I115	G6	7.296	F	I062	BB	102	-0.00877193	-0.00877193	0	NO
I104	G6_I115	G6	7.296	F	I07I	AF	111	0	0	0	NO
I104	G6_I115	G6	7.296	F	I072	AF	77.5	0	-0.00934579	0	NO
I104	G6_I115	G6	7.296	F	I076	AF	101.5	0	0.00371486	0	NO
I104	G6_I115	G6	7.296	F	I078	BB	112.5	-0.010217	-0.0484714	0	NO
I104	G6_I115	G6	7.296	F	I080	AF	104.5	0	0	0	NO
I104	G6_I115	G6	7.296	F	I081	AF	110.5	0	0	0	NO
I104	G6_I115	G6	7.296	F	I089	JUV	96	-0.015873	-0.0502646	0	NO
I104	G6_I115	G6	7.296	F	I093	AF	97	0	-0.00649351	0	NO
I104	G6_I115	G6	7.296	F	I094	SB	372.5	0	-0.0183063	0	NO
I104	G6_I115	G6	7.296	F	I099	AF	96	0	0	0	NO
I104	G6_I115	G6	7.296	F	I105	SB	167	0	0	0	NO
I104	G6_I115	G6	7.296	F	I112	AF	109	0	0	0	NO
I104	G6_I115	G6	7.296	F	I122	INF	87	0	0	0	NO
I104	G6_I115	G6	7.296	F	I126	SB	107.5	0	0	0	NO
I104	G6_I115	G6	7.296	F	I127	BB	123	0	-0.00793651	0	NO
I104	G6_I115	G6	7.296	F	I135	SAM	95	0	0.0131579	0	NO
I104	G6_I115	G6	7.296	F	I137	AF	110.5	0	0.00934579	0	NO
I104	G6_I115	G6	7.296	F	I138	SAF	89.5	0	0	0	NO
I104	G6_I115	G6	7.296	F	I140	AF	77	0	-0.0178571	0	NO
I104	G6_I115	G6	7.296	F	I141	Mother	122	-0.0420168	-0.0368403	1	NO
I122	G6_I115	G6	2.251	M	I002	INF	102	0.0474537	0.0706019	0	NO
I122	G6_I115	G6	2.251	M	I007	AF	125.5	0	0.025	0	NO
I122	G6_I115	G6	2.251	M	I010	DSB	389.5	-0.00271003	0.0308943	0	NO
I122	G6_I115	G6	2.251	M	I011	INF	93	0.0826389	0.161806	0	NO
I122	G6_I115	G6	2.251	M	I012	AF	81	0	0	0	NO
I122	G6_I115	G6	2.251	M	I014	INF	99	0	-0.0422794	0	NO
I122	G6_I115	G6	2.251	M	I015	SAF	78	0	0.0666667	0	NO
I122	G6_I115	G6	2.251	M	I019	BB	127.5	0	-0.0117158	0	NO
I122	G6_I115	G6	2.251	M	I020	AF	80.5	-0.019802	-0.039604	0	NO
I122	G6_I115	G6	2.251	M	I021	SB	132	0	0	0	NO
I122	G6_I115	G6	2.251	M	I022	AF	96	0	-0.00849673	0	NO
I122	G6_I115	G6	2.251	M	I024	BB	110	0	0.0265487	0	NO
I122	G6_I115	G6	2.251	M	I025	Mother	108.5	-0.0190476	0.0470238	1	NO
I122	G6_I115	G6	2.251	M	I040	AF	139.5	0	-0.00265869	0	NO
I122	G6_I115	G6	2.251	M	I042	SB	183	0	-0.0208791	0	NO
I122	G6_I115	G6	2.251	M	I047	INF	104.5	0.0239274	0.167583	0	NO
I122	G6_I115	G6	2.251	M	I049	SAM	93	0	-0.0229167	0	NO
I122	G6_I115	G6	2.251	M	I061	SAM	96	0	-0.0462963	0	NO
I122	G6_I115	G6	2.251	M	I062	BB	105	0	0.0175439	0	NO
I122	G6_I115	G6	2.251	M	I07I	AF	114	0	0.0643939	0	NO
I122	G6_I115	G6	2.251	M	I072	AF	80.5	0	-0.00858302	0	NO
I122	G6_I115	G6	2.251	M	I076	AF	104.5	0	0.0364669	0	NO
I122	G6_I115	G6	2.251	M	I078	BB	115.5	0	0	0	NO
I122	G6_I115	G6	2.251	M	I080	AF	107.5	0	-0.0486842	0	NO
I122	G6_I115	G6	2.251	M	I081	AF	113.5	0.008	0.114588	0	NO
I122	G6_I115	G6	2.251	M	I089	JUV	99	0	0	0	NO
I122	G6_I115	G6	2.251	M	I093	AF	100	0	0.015625	0	NO
I122	G6_I115	G6	2.251	M	I094	SB	375.5	0	0.00227502	0	NO
I122	G6_I115	G6	2.251	M	I099	AF	99	0	0.0116422	0	NO
I122	G6_I115	G6	2.251	M	I104	SAF	87	0	0	0	NO
I122	G6_I115	G6	2.251	M	I105	SB	170	0	0.0153061	0	NO
I122	G6_I115	G6	2.251	M	I112	AF	112	-0.034188	-0.0488857	0	NO
I122	G6_I115	G6	2.251	M	I126	SB	110.5	0	0	0	NO
I122	G6_I115	G6	2.251	M	I127	BB	126	0	0.0138889	0	NO
I122	G6_I115	G6	2.251	M	I135	SAM	98	0.05	0.245417	0	NO
I122	G6_I115	G6	2.251	M	I137	AF	113.5	0	0.0555025	0	NO
I122	G6_I115	G6	2.251	M	I138	SAF	92.5	0	0.0345272	0	NO
I122	G6_I115	G6	2.251	M	I140	AF	80	-0.0106383	-0.0212766	0	NO
I122	G6_I115	G6	2.251	M	I141	AF	125	0	0	0	NO
I135	G6_I115	G6	6.07	M	I002	INF	110	0	0.0416667	0	NO
I135	G6_I115	G6	6.07	M	I007	AF	133.5	0	0.0596661	0	NO
I135	G6_I115	G6	6.07	M	I010	DSB	397.5	0	0.0356233	0	NO
I135	G6_I115	G6	6.07	M	I011	INF	101	0	0.0303922	0	NO
I135	G6_I115	G6	6.07	M	I012	AF	89	0	0	0	NO
I135	G6_I115	G6	6.07	M	I014	INF	107	-0.00925926	0.00995807	0	NO
I135	G6_I115	G6	6.07	M	I015	SAF	86	0	0	0	NO
I135	G6_I115	G6	6.07	M	I019	BB	135.5	0	0	0	NO
I135	G6_I115	G6	6.07	M	I020	AF	88.5	0	-0.0353982	0	NO
I135	G6_I115	G6	6.07	M	I021	SB	140	0	0	0	NO
I135	G6_I115	G6	6.07	M	I022	AF	104	0	0.0106383	0	NO
I135	G6_I115	G6	6.07	M	I024	BB	118	0	0.0428787	0	NO
I135	G6_I115	G6	6.07	M	I025	Mother	116.5	0.0520189	0.329134	1	NO
I135	G6_I115	G6	6.07	M	I040	AF	147.5	0	0.0110497	0	NO
I135	G6_I115	G6	6.07	M	I042	SB	191	0	-0.00979083	0	NO
I135	G6_I115	G6	6.07	M	I047	INF	112.5	0	0.0271018	0	NO
I135	G6_I115	G6	6.07	M	I049	SAM	101	-0.0294118	-0.00921569	0	NO
I135	G6_I115	G6	6.07	M	I061	SAM	104	0	0.0318182	0	NO
I135	G6_I115	G6	6.07	M	I062	BB	113	-0.0185185	-0.0100439	0	NO
I135	G6_I115	G6	6.07	M	I07I	AF	122	0.0294118	0.0882353	0	NO
I135	G6_I115	G6	6.07	M	I072	AF	88.5	0	0.0164148	0	NO
I135	G6_I115	G6	6.07	M	I076	AF	112.5	0	0.018018	0	NO
I135	G6_I115	G6	6.07	M	I078	BB	123.5	0.00684932	0.00684932	0	NO
I135	G6_I115	G6	6.07	M	I080	AF	115.5	0	0.0241935	0	NO
I135	G6_I115	G6	6.07	M	I081	AF	121.5	0.00775194	0.0532436	0	NO
I135	G6_I115	G6	6.07	M	I089	JUV	107	0	-0.00980392	0	NO
I135	G6_I115	G6	6.07	M	I093	AF	108	0	0	0	NO
I135	G6_I115	G6	6.07	M	I094	SB	383.5	0	-0.00290749	0	NO
I135	G6_I115	G6	6.07	M	I099	AF	107	0	-0.0338596	0	NO
I135	G6_I115	G6	6.07	M	I104	SAF	95	0	0.0131579	0	NO
I135	G6_I115	G6	6.07	M	I105	SB	178	-0.0128205	-0.0320513	0	NO
I135	G6_I115	G6	6.07	M	I112	AF	120	0	0.0115232	0	NO
I135	G6_I115	G6	6.07	M	I122	INF	98	0.05	0.245417	0	NO
I135	G6_I115	G6	6.07	M	I126	SB	118.5	0	0	0	NO
I135	G6_I115	G6	6.07	M	I127	BB	134	-0.0166667	-0.00990991	0	NO
I135	G6_I115	G6	6.07	M	I137	AF	121.5	0.0148148	0.0444444	0	NO
I135	G6_I115	G6	6.07	M	I138	SAF	100.5	0.00149343	0.0442055	0	NO
I135	G6_I115	G6	6.07	M	I140	AF	88	0	0	0	NO
I135	G6_I115	G6	6.07	M	I141	AF	133	0	0.00653595	0	NO
I138	G6_I115	G6	6.886	F	I002	INF	104.5	0	0.00290262	0	NO
I138	G6_I115	G6	6.886	F	I007	AF	128	0	0.0195557	0	NO
I138	G6_I115	G6	6.886	F	I010	DSB	392	-0.00787402	-0.0101209	0	NO
I138	G6_I115	G6	6.886	F	I011	INF	95.5	0	0.103988	0	NO
I138	G6_I115	G6	6.886	F	I012	AF	83.5	0	0	0	NO
I138	G6_I115	G6	6.886	F	I014	INF	101.5	0	-0.0265107	0	NO
I138	G6_I115	G6	6.886	F	I015	SAF	80.5	0	0.0754717	0	NO
I138	G6_I115	G6	6.886	F	I019	BB	130	0	-0.0345238	0	NO
I138	G6_I115	G6	6.886	F	I020	AF	83	0	-0.0353982	0	NO
I138	G6_I115	G6	6.886	F	I021	SB	134.5	0	0	0	NO
I138	G6_I115	G6	6.886	F	I022	AF	98.5	0	0.0120482	0	NO
I138	G6_I115	G6	6.886	F	I024	BB	112.5	0	0.0188679	0	NO
I138	G6_I115	G6	6.886	F	I025	AF	111	0.0019536	-0.003663	0	NO
I138	G6_I115	G6	6.886	F	I040	AF	142	0	-0.0379773	0	NO
I138	G6_I115	G6	6.886	F	I042	SB	185.5	0.00492611	0.067734	0	NO
I138	G6_I115	G6	6.886	F	I047	INF	107	-0.0884956	-0.015421	0	NO
I138	G6_I115	G6	6.886	F	I049	SAM	95.5	-0.00980392	0.0042961	0	NO
I138	G6_I115	G6	6.886	F	I061	SAM	98.5	-0.00833333	-0.049026	0	NO
I138	G6_I115	G6	6.886	F	I062	BB	107.5	0.0373832	0.028297	0	NO
I138	G6_I115	G6	6.886	F	I07I	AF	116.5	0	-0.0382963	0	NO
I138	G6_I115	G6	6.886	F	I072	AF	83	0	-0.029703	0	NO
I138	G6_I115	G6	6.886	F	I076	AF	107	0.00122807	0.0861404	0	NO
I138	G6_I115	G6	6.886	F	I078	BB	118	0	-0.00990099	0	NO
I138	G6_I115	G6	6.886	F	I080	AF	110	0	0.0176991	0	NO
I138	G6_I115	G6	6.886	F	I081	Mother	116	-0.0365745	-0.00624442	1	NO
I138	G6_I115	G6	6.886	F	I089	JUV	101.5	0	0	0	NO
I138	G6_I115	G6	6.886	F	I093	AF	102.5	0	-0.00675676	0	NO
I138	G6_I115	G6	6.886	F	I094	SB	378	0	0.00516796	0	NO
I138	G6_I115	G6	6.886	F	I099	AF	101.5	0	0.011236	0	NO
I138	G6_I115	G6	6.886	F	I104	SAF	89.5	0	0	0	NO
I138	G6_I115	G6	6.886	F	I105	SB	172.5	0	-0.00641026	0	NO
I138	G6_I115	G6	6.886	F	I112	AF	114.5	-0.00775194	0.0279845	0	NO
I138	G6_I115	G6	6.886	F	I122	INF	92.5	0	0.0345272	0	NO
I138	G6_I115	G6	6.886	F	I126	SB	113	0	0	0	NO
I138	G6_I115	G6	6.886	F	I127	BB	128.5	0	0.00626521	0	NO
I138	G6_I115	G6	6.886	F	I135	SAM	100.5	0.00149343	0.0442055	0	NO
I138	G6_I115	G6	6.886	F	I137	AF	116	-0.00925926	0.00567503	0	NO
I138	G6_I115	G6	6.886	F	I140	AF	82.5	0	0	0	NO
I138	G6_I115	G6	6.886	F	I141	AF	127.5	0	0	0	NO
I002	G6_I121	G6	2.7488	M	I007	AF	137.5	-0.0239521	0.120426	0	NO
I002	G6_I121	G6	2.7488	M	I010	DSB	397.5	-0.00224719	0.0934189	0	NO
I002	G6_I121	G6	2.7488	M	I011	INF	105	0.00493421	0.0548246	0	NO
I002	G6_I121	G6	2.7488	M	I014	INF	111	0.00925926	0.0102339	0	NO
I002	G6_I121	G6	2.7488	M	I019	BB	139.5	0	0.0070922	0	NO
I002	G6_I121	G6	2.7488	M	I021	SB	144	0	-0.013986	0	NO
I002	G6_I121	G6	2.7488	M	I024	BB	122	0	0.0252101	0	NO
I002	G6_I121	G6	2.7488	M	I025	AF	123.5	0	0.0484284	0	NO
I002	G6_I121	G6	2.7488	M	I040	AF	151.5	0	0.000392465	0	NO
I002	G6_I121	G6	2.7488	M	I042	SB	189	-0.00574713	0.00321163	0	NO
I002	G6_I121	G6	2.7488	M	I047	INF	119.5	0.0190877	0.139298	0	NO
I002	G6_I121	G6	2.7488	M	I049	SAM	105	0.0196078	0.0593682	0	NO
I002	G6_I121	G6	2.7488	M	I061	SAM	111	-0.00757576	-0.00757576	0	NO
I002	G6_I121	G6	2.7488	M	I062	BB	120	0	0	0	NO
I002	G6_I121	G6	2.7488	M	I07I	AF	129	0	-0.0107407	0	NO
I002	G6_I121	G6	2.7488	M	I076	AF	116.5	0	-0.00060006	0	NO
I002	G6_I121	G6	2.7488	M	I078	BB	124.5	0	0.0140845	0	NO
I002	G6_I121	G6	2.7488	M	I080	Mother	116.5	-0.0743152	0.0124981	1	NO
I002	G6_I121	G6	2.7488	M	I081	AF	128.5	0	0.019802	0	NO
I002	G6_I121	G6	2.7488	M	I089	JUV	111	-0.00925926	-0.037037	0	NO
I002	G6_I121	G6	2.7488	M	I093	AF	109	0	0	0	NO
I002	G6_I121	G6	2.7488	M	I094	SB	381.5	0	0.00360417	0	NO
I002	G6_I121	G6	2.7488	M	I099	AF	111	0	0.0238928	0	NO
I002	G6_I121	G6	2.7488	M	I104	SAF	96	0	-0.025	0	NO
I002	G6_I121	G6	2.7488	M	I105	SB	182	0	-0.00160256	0	NO
I002	G6_I121	G6	2.7488	M	I112	AF	121	0	0.0271719	0	NO
I002	G6_I121	G6	2.7488	M	I122	INF	105	0.041939	0.0675381	0	NO
I002	G6_I121	G6	2.7488	M	I126	SB	116.5	0	0	0	NO
I002	G6_I121	G6	2.7488	M	I127	BB	135	0	0.0151515	0	NO
I002	G6_I121	G6	2.7488	M	I135	SAM	110	0	0.0383979	0	NO
I002	G6_I121	G6	2.7488	M	I137	AF	125.5	0	0.0771677	0	NO
I002	G6_I121	G6	2.7488	M	I138	SAF	101.5	0	0.00246403	0	NO
I002	G6_I121	G6	2.7488	M	I141	AF	137	0	-0.00699301	0	NO
I011	G6_I121	G6	2.86927	M	I002	INF	105	0.00493421	0.0548246	0	NO
I011	G6_I121	G6	2.86927	M	I007	AF	128.5	0	0.0488441	0	NO
I011	G6_I121	G6	2.86927	M	I010	DSB	388.5	0.00285714	0.120515	0	NO
I011	G6_I121	G6	2.86927	M	I014	INF	102	-0.0208333	-0.056713	0	NO
I011	G6_I121	G6	2.86927	M	I019	BB	130.5	0	0.00585106	0	NO
I011	G6_I121	G6	2.86927	M	I021	SB	135	0	0	0	NO
I011	G6_I121	G6	2.86927	M	I024	BB	113	0	0.00840336	0	NO
I011	G6_I121	G6	2.86927	M	I025	AF	114.5	0	-0.0132424	0	NO
I011	G6_I121	G6	2.86927	M	I040	AF	142.5	0	0.00591541	0	NO
I011	G6_I121	G6	2.86927	M	I042	SB	180	0	-0.0207391	0	NO
I011	G6_I121	G6	2.86927	M	I047	INF	110.5	-0.00114773	0.109444	0	NO
I011	G6_I121	G6	2.86927	M	I049	SAM	96	-0.0111111	-0.0568627	0	NO
I011	G6_I121	G6	2.86927	M	I061	SAM	102	-0.0391813	0.167836	0	NO
I011	G6_I121	G6	2.86927	M	I062	BB	111	-0.00980392	-0.0392157	0	NO
I011	G6_I121	G6	2.86927	M	I07I	Mother	120	0.0572391	0.143939	1	NO
I011	G6_I121	G6	2.86927	M	I076	AF	107.5	0	0.0121591	0	NO
I011	G6_I121	G6	2.86927	M	I078	BB	115.5	0	-0.011236	0	NO
I011	G6_I121	G6	2.86927	M	I080	AF	107.5	0	0.0303661	0	NO
I011	G6_I121	G6	2.86927	M	I081	AF	119.5	0	0.0997274	0	NO
I011	G6_I121	G6	2.86927	M	I089	JUV	102	0	-0.0222222	0	NO
I011	G6_I121	G6	2.86927	M	I093	AF	100	0	0.00919118	0	NO
I011	G6_I121	G6	2.86927	M	I094	SB	372.5	0	-0.00963855	0	NO
I011	G6_I121	G6	2.86927	M	I099	AF	102	0	0.000658762	0	NO
I011	G6_I121	G6	2.86927	M	I104	SAF	87	0	0	0	NO
I011	G6_I121	G6	2.86927	M	I105	SB	173	0	-0.00243868	0	NO
I011	G6_I121	G6	2.86927	M	I112	AF	112	0	-0.037037	0	NO
I011	G6_I121	G6	2.86927	M	I122	INF	96	0.0869281	0.168627	0	NO
I011	G6_I121	G6	2.86927	M	I126	SB	107.5	0	0	0	NO
I011	G6_I121	G6	2.86927	M	I127	BB	126	0.00757576	0.15	0	NO
I011	G6_I121	G6	2.86927	M	I135	SAM	101	0	0.0263365	0	NO
I011	G6_I121	G6	2.86927	M	I137	AF	116.5	0	0.00422786	0	NO
I011	G6_I121	G6	2.86927	M	I138	SAF	92.5	0	-0.0271536	0	NO
I011	G6_I121	G6	2.86927	M	I141	AF	128	0	0	0	NO
I014	G6_I121	G6	3.66324	M	I002	INF	111	0.00925926	0.0102339	0	NO
I014	G6_I121	G6	3.66324	M	I007	AF	134.5	0	0.025	0	NO
I014	G6_I121	G6	3.66324	M	I010	DSB	394.5	0.00552486	0.0405372	0	NO
I014	G6_I121	G6	3.66324	M	I011	INF	102	-0.0208333	-0.056713	0	NO
I014	G6_I121	G6	3.66324	M	I019	BB	136.5	-0.00833333	0.045098	0	NO
I014	G6_I121	G6	3.66324	M	I021	SB	141	0	0.0254777	0	NO
I014	G6_I121	G6	3.66324	M	I024	BB	119	0.00763359	0.0517229	0	NO
I014	G6_I121	G6	3.66324	M	I025	AF	120.5	0	-0.00714286	0	NO
I014	G6_I121	G6	3.66324	M	I040	Mother	148.5	-0.00259776	0.230517	1	NO
I014	G6_I121	G6	3.66324	M	I042	SB	186	0	0	0	NO
I014	G6_I121	G6	3.66324	M	I047	INF	116.5	0	-0.0019285	0	NO
I014	G6_I121	G6	3.66324	M	I049	SAM	102	0.00877193	0.00584795	0	NO
I014	G6_I121	G6	3.66324	M	I061	SAM	108	0	-0.00670795	0	NO
I014	G6_I121	G6	3.66324	M	I062	BB	117	0.0182709	0.187611	0	NO
I014	G6_I121	G6	3.66324	M	I07I	AF	126	0	-0.0128788	0	NO
I014	G6_I121	G6	3.66324	M	I076	AF	113.5	0	-0.0086943	0	NO
I014	G6_I121	G6	3.66324	M	I078	BB	121.5	0.00649351	0.0796731	0	NO
I014	G6_I121	G6	3.66324	M	I080	AF	113.5	0	-0.00884956	0	NO
I014	G6_I121	G6	3.66324	M	I081	AF	125.5	0.00884956	0.0225087	0	NO
I014	G6_I121	G6	3.66324	M	I089	JUV	108	0.0555556	0.126984	0	NO
I014	G6_I121	G6	3.66324	M	I093	AF	106	0	-0.0220588	0	NO
I014	G6_I121	G6	3.66324	M	I094	SB	378.5	0	0.0614035	0	NO
I014	G6_I121	G6	3.66324	M	I099	AF	108	0	-0.0596433	0	NO
I014	G6_I121	G6	3.66324	M	I104	SAF	93	0	0	0	NO
I014	G6_I121	G6	3.66324	M	I105	SB	179	0	0.0391963	0	NO
I014	G6_I121	G6	3.66324	M	I112	AF	118	0	0.00506051	0	NO
I014	G6_I121	G6	3.66324	M	I122	INF	102	0	-0.0245614	0	NO
I014	G6_I121	G6	3.66324	M	I126	SB	113.5	0	0.030303	0	NO
I014	G6_I121	G6	3.66324	M	I127	BB	132	0	0.0194444	0	NO
I014	G6_I121	G6	3.66324	M	I135	SAM	107	-0.0104167	0.013065	0	NO
I014	G6_I121	G6	3.66324	M	I137	AF	122.5	0	0.0252101	0	NO
I014	G6_I121	G6	3.66324	M	I138	SAF	98.5	0	-0.021349	0	NO
I014	G6_I121	G6	3.66324	M	I141	AF	134	0	0.027972	0	NO
I047	G6_I121	G6	2.54894	F	I002	INF	119.5	0.0190877	0.139298	0	NO
I047	G6_I121	G6	2.54894	F	I007	AF	143	0	0.0555556	0	NO
I047	G6_I121	G6	2.54894	F	I010	DSB	403	0.013587	0.0988684	0	NO
I047	G6_I121	G6	2.54894	F	I011	INF	110.5	-0.00114773	0.109444	0	NO
I047	G6_I121	G6	2.54894	F	I014	INF	116.5	0	-0.0019285	0	NO
I047	G6_I121	G6	2.54894	F	I019	BB	145	0	-0.0179557	0	NO
I047	G6_I121	G6	2.54894	F	I021	SB	149.5	0	0	0	NO
I047	G6_I121	G6	2.54894	F	I024	BB	127.5	0	0.00729927	0	NO
I047	G6_I121	G6	2.54894	F	I025	AF	129	0	0.031132	0	NO
I047	G6_I121	G6	2.54894	F	I040	AF	157	0	-0.0166768	0	NO
I047	G6_I121	G6	2.54894	F	I042	SB	194.5	0	0.0346065	0	NO
I047	G6_I121	G6	2.54894	F	I049	SAM	110.5	0	-0.024505	0	NO
I047	G6_I121	G6	2.54894	F	I061	SAM	116.5	-0.032	-0.050963	0	NO
I047	G6_I121	G6	2.54894	F	I062	BB	125.5	0	-0.00160318	0	NO
I047	G6_I121	G6	2.54894	F	I07I	AF	134.5	0	-0.041958	0	NO
I047	G6_I121	G6	2.54894	F	I076	AF	122	-0.024	-0.0851765	0	NO
I047	G6_I121	G6	2.54894	F	I078	BB	130	0	0	0	NO
I047	G6_I121	G6	2.54894	F	I080	AF	122	0	0.0258065	0	NO
I047	G6_I121	G6	2.54894	F	I081	Mother	134	0.0523377	0.0528453	1	NO
I047	G6_I121	G6	2.54894	F	I089	JUV	116.5	0	0	0	NO
I047	G6_I121	G6	2.54894	F	I093	AF	114.5	0	0	0	NO
I047	G6_I121	G6	2.54894	F	I094	SB	387	0	-0.00651611	0	NO
I047	G6_I121	G6	2.54894	F	I099	AF	116.5	0	-0.0231703	0	NO
I047	G6_I121	G6	2.54894	F	I104	SAF	101.5	0	0	0	NO
I047	G6_I121	G6	2.54894	F	I105	SB	187.5	0	0.0042763	0	NO
I047	G6_I121	G6	2.54894	F	I112	AF	126.5	0.0280374	0.00128025	0	NO
I047	G6_I121	G6	2.54894	F	I122	INF	110.5	0.0155941	0.15462	0	NO
I047	G6_I121	G6	2.54894	F	I126	SB	122	0	0	0	NO
I047	G6_I121	G6	2.54894	F	I127	BB	140.5	0	0	0	NO
I047	G6_I121	G6	2.54894	F	I135	SAM	115.5	0	0.0351975	0	NO
I047	G6_I121	G6	2.54894	F	I137	AF	131	0	0.0195036	0	NO
I047	G6_I121	G6	2.54894	F	I138	SAF	107	-0.0934579	-0.0373832	0	NO
I047	G6_I121	G6	2.54894	F	I141	AF	142.5	0	0.00671141	0	NO
I049	G6_I121	G6	6.18207	M	I002	INF	105	0.0196078	0.0593682	0	NO
I049	G6_I121	G6	6.18207	M	I007	AF	128.5	0	0.0246596	0	NO
I049	G6_I121	G6	6.18207	M	I010	DSB	388.5	0	-0.00192159	0	NO
I049	G6_I121	G6	6.18207	M	I011	INF	96	-0.0111111	-0.0568627	0	NO
I049	G6_I121	G6	6.18207	M	I014	INF	102	0.00877193	0.00584795	0	NO
I049	G6_I121	G6	6.18207	M	I019	BB	130.5	0.00680272	0.00966702	0	NO
I049	G6_I121	G6	6.18207	M	I021	SB	135	0	0	0	NO
I049	G6_I121	G6	6.18207	M	I024	BB	113	0	-0.00190099	0	NO
I049	G6_I121	G6	6.18207	M	I025	AF	114.5	0	0.0842105	0	NO
I049	G6_I121	G6	6.18207	M	I040	AF	142.5	0	0.0196078	0	NO
I049	G6_I121	G6	6.18207	M	I042	SB	180	-0.00666667	-0.0257143	0	NO
I049	G6_I121	G6	6.18207	M	I047	INF	110.5	0	-0.024505	0	NO
I049	G6_I121	G6	6.18207	M	I061	SAM	102	0.0324074	0.0787037	0	NO
I049	G6_I121	G6	6.18207	M	I062	BB	111	0.015873	0.0372024	0	NO
I049	G6_I121	G6	6.18207	M	I07I	AF	120	0	0.0271512	0	NO
I049	G6_I121	G6	6.18207	M	I076	AF	107.5	0	0.0187781	0	NO
I049	G6_I121	G6	6.18207	M	I078	BB	115.5	0	-0.0173396	0	NO
I049	G6_I121	G6	6.18207	M	I080	AF	107.5	0	0	0	NO
I049	G6_I121	G6	6.18207	M	I081	AF	119.5	0	0.0298074	0	NO
I049	G6_I121	G6	6.18207	M	I089	JUV	102	-0.0238095	-0.00714286	0	NO
I049	G6_I121	G6	6.18207	M	I093	AF	100	0	0.00659341	0	NO
I049	G6_I121	G6	6.18207	M	I094	SB	372.5	0	0.0189195	0	NO
I049	G6_I121	G6	6.18207	M	I099	AF	102	0	-0.0151515	0	NO
I049	G6_I121	G6	6.18207	M	I104	SAF	87	-0.0104167	-0.00801282	0	NO
I049	G6_I121	G6	6.18207	M	I105	SB	173	-0.00757576	-0.00757576	0	NO
I049	G6_I121	G6	6.18207	M	I112	AF	112	0	0	0	NO
I049	G6_I121	G6	6.18207	M	I122	INF	96	0	-0.026455	0	NO
I049	G6_I121	G6	6.18207	M	I126	SB	107.5	0	0	0	NO
I049	G6_I121	G6	6.18207	M	I127	BB	126	0	-0.0102975	0	NO
I049	G6_I121	G6	6.18207	M	I135	SAM	101	-0.0132937	0.0470238	0	NO
I049	G6_I121	G6	6.18207	M	I137	Mother	116.5	-0.00523599	0.214897	1	NO
I049	G6_I121	G6	6.18207	M	I138	SAF	92.5	-0.0111111	-0.00175439	0	NO
I049	G6_I121	G6	6.18207	M	I141	AF	128	0	0.0218978	0	NO
I061	G6_I121	G6	6.18754	M	I002	INF	111	-0.00757576	-0.00757576	0	NO
I061	G6_I121	G6	6.18754	M	I007	AF	134.5	0	0.0332277	0	NO
I061	G6_I121	G6	6.18754	M	I010	DSB	394.5	0.014267	0.00181604	0	NO
I061	G6_I121	G6	6.18754	M	I011	INF	102	-0.0391813	0.167836	0	NO
I061	G6_I121	G6	6.18754	M	I014	INF	108	0	-0.00670795	0	NO
I061	G6_I121	G6	6.18754	M	I019	BB	136.5	0	0.00756844	0	NO
I061	G6_I121	G6	6.18754	M	I021	SB	141	0	0	0	NO
I061	G6_I121	G6	6.18754	M	I024	BB	119	0	0.00884956	0	NO
I061	G6_I121	G6	6.18754	M	I025	AF	120.5	0	-0.0253165	0	NO
I061	G6_I121	G6	6.18754	M	I040	AF	148.5	0	-0.00504637	0	NO
I061	G6_I121	G6	6.18754	M	I042	SB	186	0	-0.000696621	0	NO
I061	G6_I121	G6	6.18754	M	I047	INF	116.5	-0.032	-0.050963	0	NO
I061	G6_I121	G6	6.18754	M	I049	SAM	102	0.0324074	0.0787037	0	NO
I061	G6_I121	G6	6.18754	M	I062	BB	117	-0.00833333	-0.0157895	0	NO
I061	G6_I121	G6	6.18754	M	I07I	Mother	126	0.139608	0.302353	1	NO
I061	G6_I121	G6	6.18754	M	I076	AF	113.5	0	0.0134769	0	NO
I061	G6_I121	G6	6.18754	M	I078	BB	121.5	0	0	0	NO
I061	G6_I121	G6	6.18754	M	I080	AF	113.5	0	0.0340331	0	NO
I061	G6_I121	G6	6.18754	M	I081	AF	125.5	0	-0.0128205	0	NO
I061	G6_I121	G6	6.18754	M	I089	JUV	108	0.00925926	0.0185185	0	NO
I061	G6_I121	G6	6.18754	M	I093	AF	106	0	0.0172414	0	NO
I061	G6_I121	G6	6.18754	M	I094	SB	378.5	0	0.00697117	0	NO
I061	G6_I121	G6	6.18754	M	I099	AF	108	0	-0.0282051	0	NO
I061	G6_I121	G6	6.18754	M	I104	SAF	93	0	0	0	NO
I061	G6_I121	G6	6.18754	M	I105	SB	179	-0.00641026	0.0168825	0	NO
I061	G6_I121	G6	6.18754	M	I112	AF	118	0	-0.0130719	0	NO
I061	G6_I121	G6	6.18754	M	I122	INF	102	0	-0.0462963	0	NO
I061	G6_I121	G6	6.18754	M	I126	SB	113.5	0	0	0	NO
I061	G6_I121	G6	6.18754	M	I127	BB	132	0.031746	0.15942	0	NO
I061	G6_I121	G6	6.18754	M	I135	SAM	107	0	0.0412281	0	NO
I061	G6_I121	G6	6.18754	M	I137	AF	122.5	0	0.0385726	0	NO
I061	G6_I121	G6	6.18754	M	I138	SAF	98.5	-0.00877193	-0.0460791	0	NO
I061	G6_I121	G6	6.18754	M	I141	AF	134	0	0.016	0	NO
I089	G6_I121	G6	4.15332	M	I002	INF	111	-0.00925926	-0.037037	0	NO
I089	G6_I121	G6	4.15332	M	I007	AF	134.5	0	0.0485625	0	NO
I089	G6_I121	G6	4.15332	M	I010	DSB	394.5	-0.0023753	0.0115538	0	NO
I089	G6_I121	G6	4.15332	M	I011	INF	102	0	-0.0222222	0	NO
I089	G6_I121	G6	4.15332	M	I014	INF	108	0.0555556	0.126984	0	NO
I089	G6_I121	G6	4.15332	M	I019	BB	136.5	0	0	0	NO
I089	G6_I121	G6	4.15332	M	I021	SB	141	0	0.0131979	0	NO
I089	G6_I121	G6	4.15332	M	I024	BB	119	-0.0125027	0.0417721	0	NO
I089	G6_I121	G6	4.15332	M	I025	AF	120.5	0	-0.00746269	0	NO
I089	G6_I121	G6	4.15332	M	I040	AF	148.5	0	0.0606061	0	NO
I089	G6_I121	G6	4.15332	M	I042	SB	186	0	0	0	NO
I089	G6_I121	G6	4.15332	M	I047	INF	116.5	0	0	0	NO
I089	G6_I121	G6	4.15332	M	I049	SAM	102	-0.0238095	-0.00714286	0	NO
I089	G6_I121	G6	4.15332	M	I061	SAM	108	0.00925926	0.0185185	0	NO
I089	G6_I121	G6	4.15332	M	I062	BB	117	0.0217391	0.0434783	0	NO
I089	G6_I121	G6	4.15332	M	I07I	AF	126	0	0	0	NO
I089	G6_I121	G6	4.15332	M	I076	AF	113.5	0	0	0	NO
I089	G6_I121	G6	4.15332	M	I078	BB	121.5	-0.00579819	0.033509	0	NO
I089	G6_I121	G6	4.15332	M	I080	AF	113.5	0	0.00833333	0	NO
I089	G6_I121	G6	4.15332	M	I081	AF	125.5	0	0.0504202	0	NO
I089	G6_I121	G6	4.15332	M	I093	AF	106	0	-0.00769231	0	NO
I089	G6_I121	G6	4.15332	M	I094	SB	378.5	0.0017143	0.0765815	0	NO
I089	G6_I121	G6	4.15332	M	I099	AF	108	0	-0.00757576	0	NO
I089	G6_I121	G6	4.15332	M	I104	SAF	93	-0.0201389	-0.0506944	0	NO
I089	G6_I121	G6	4.15332	M	I105	SB	179	0.00884956	0.039823	0	NO
I089	G6_I121	G6	4.15332	M	I112	AF	118	0	-0.00775194	0	NO
I089	G6_I121	G6	4.15332	M	I122	INF	102	0	0	0	NO
I089	G6_I121	G6	4.15332	M	I126	SB	113.5	0	0.0032568	0	NO
I089	G6_I121	G6	4.15332	M	I127	BB	132	0	0	0	NO
I089	G6_I121	G6	4.15332	M	I135	SAM	107	0	-0.0111111	0	NO
I089	G6_I121	G6	4.15332	M	I137	AF	122.5	0	0.048	0	NO
I089	G6_I121	G6	4.15332	M	I138	SAF	98.5	0	0	0	NO
I089	G6_I121	G6	4.15332	M	I141	Mother	134	0.0384073	0.180531	1	NO
I104	G6_I121	G6	7.34018	F	I002	INF	96	0	-0.025	0	NO
I104	G6_I121	G6	7.34018	F	I007	AF	119.5	0	-0.00745008	0	NO
I104	G6_I121	G6	7.34018	F	I010	DSB	379.5	0	0.00306748	0	NO
I104	G6_I121	G6	7.34018	F	I011	INF	87	0	0	0	NO
I104	G6_I121	G6	7.34018	F	I014	INF	93	0	0	0	NO
I104	G6_I121	G6	7.34018	F	I019	BB	121.5	0	-0.015873	0	NO
I104	G6_I121	G6	7.34018	F	I021	SB	126	0	0.00826446	0	NO
I104	G6_I121	G6	7.34018	F	I024	BB	104	-0.0071728	-0.0392175	0	NO
I104	G6_I121	G6	7.34018	F	I025	AF	105.5	0	0	0	NO
I104	G6_I121	G6	7.34018	F	I040	AF	133.5	0	0	0	NO
I104	G6_I121	G6	7.34018	F	I042	SB	171	0	-0.00679012	0	NO
I104	G6_I121	G6	7.34018	F	I047	INF	101.5	0	0	0	NO
I104	G6_I121	G6	7.34018	F	I049	SAM	87	-0.0104167	-0.00801282	0	NO
I104	G6_I121	G6	7.34018	F	I061	SAM	93	0	0	0	NO
I104	G6_I121	G6	7.34018	F	I062	BB	102	-0.00925926	-0.00925926	0	NO
I104	G6_I121	G6	7.34018	F	I07I	AF	111	0	0	0	NO
I104	G6_I121	G6	7.34018	F	I076	AF	98.5	0	0.00465368	0	NO
I104	G6_I121	G6	7.34018	F	I078	BB	106.5	-0.0125781	-0.0462087	0	NO
I104	G6_I121	G6	7.34018	F	I080	AF	98.5	0	0	0	NO
I104	G6_I121	G6	7.34018	F	I081	AF	110.5	0	0	0	NO
I104	G6_I121	G6	7.34018	F	I089	JUV	93	-0.0201389	-0.0506944	0	NO
I104	G6_I121	G6	7.34018	F	I093	AF	91	0	-0.00704225	0	NO
I104	G6_I121	G6	7.34018	F	I094	SB	363.5	0	-0.0433453	0	NO
I104	G6_I121	G6	7.34018	F	I099	AF	93	0	0	0	NO
I104	G6_I121	G6	7.34018	F	I105	SB	164	0	0	0	NO
I104	G6_I121	G6	7.34018	F	I112	AF	103	0	0	0	NO
I104	G6_I121	G6	7.34018	F	I122	INF	87	0	0	0	NO
I104	G6_I121	G6	7.34018	F	I126	SB	98.5	0	0	0	NO
I104	G6_I121	G6	7.34018	F	I127	BB	117	0	-0.00793651	0	NO
I104	G6_I121	G6	7.34018	F	I135	SAM	92	0	0.0121951	0	NO
I104	G6_I121	G6	7.34018	F	I137	AF	107.5	0	0.0120482	0	NO
I104	G6_I121	G6	7.34018	F	I138	SAF	83.5	0	0	0	NO
I104	G6_I121	G6	7.34018	F	I141	Mother	119	-0.0305344	-0.0941	1	NO
I122	G6_I121	G6	2.29432	M	I002	INF	105	0.041939	0.0675381	0	NO
I122	G6_I121	G6	2.29432	M	I007	AF	128.5	0	0.0263158	0	NO
I122	G6_I121	G6	2.29432	M	I010	DSB	388.5	-0.0023753	0.0766233	0	NO
I122	G6_I121	G6	2.29432	M	I011	INF	96	0.0869281	0.168627	0	NO
I122	G6_I121	G6	2.29432	M	I014	INF	102	0	-0.0245614	0	NO
I122	G6_I121	G6	2.29432	M	I019	BB	130.5	0	-0.0107411	0	NO
I122	G6_I121	G6	2.29432	M	I021	SB	135	0	0	0	NO
I122	G6_I121	G6	2.29432	M	I024	BB	113	0	0.024	0	NO
I122	G6_I121	G6	2.29432	M	I025	Mother	114.5	-0.0751767	-0.0347211	1	NO
I122	G6_I121	G6	2.29432	M	I040	AF	142.5	0	0.00445633	0	NO
I122	G6_I121	G6	2.29432	M	I042	SB	180	0	-0.0219048	0	NO
I122	G6_I121	G6	2.29432	M	I047	INF	110.5	0.0155941	0.15462	0	NO
I122	G6_I121	G6	2.29432	M	I049	SAM	96	0	-0.026455	0	NO
I122	G6_I121	G6	2.29432	M	I061	SAM	102	0	-0.0462963	0	NO
I122	G6_I121	G6	2.29432	M	I062	BB	111	0	0.015873	0	NO
I122	G6_I121	G6	2.29432	M	I07I	AF	120	0	0.0075188	0	NO
I122	G6_I121	G6	2.29432	M	I076	AF	107.5	0	-0.036864	0	NO
I122	G6_I121	G6	2.29432	M	I078	BB	115.5	0	0	0	NO
I122	G6_I121	G6	2.29432	M	I080	AF	107.5	0	-0.0376428	0	NO
I122	G6_I121	G6	2.29432	M	I081	AF	119.5	-0.00757576	0.160153	0	NO
I122	G6_I121	G6	2.29432	M	I089	JUV	102	0	0	0	NO
I122	G6_I121	G6	2.29432	M	I093	AF	100	0	0.0142857	0	NO
I122	G6_I121	G6	2.29432	M	I094	SB	372.5	0	-0.00733496	0	NO
I122	G6_I121	G6	2.29432	M	I099	AF	102	0	0.00505051	0	NO
I122	G6_I121	G6	2.29432	M	I104	SAF	87	0	0	0	NO
I122	G6_I121	G6	2.29432	M	I105	SB	173	0	0.0140187	0	NO
I122	G6_I121	G6	2.29432	M	I112	AF	112	-0.0310078	-0.00383517	0	NO
I122	G6_I121	G6	2.29432	M	I126	SB	107.5	0	0	0	NO
I122	G6_I121	G6	2.29432	M	I127	BB	126	0	0.0144928	0	NO
I122	G6_I121	G6	2.29432	M	I135	SAM	101	0.0535714	0.25496	0	NO
I122	G6_I121	G6	2.29432	M	I137	AF	116.5	0	0.00309735	0	NO
I122	G6_I121	G6	2.29432	M	I138	SAF	92.5	0	0.0309942	0	NO
I122	G6_I121	G6	2.29432	M	I141	AF	128	0	0	0	NO
I135	G6_I121	G6	6.11362	M	I002	INF	110	0	0.0383979	0	NO
I135	G6_I121	G6	6.11362	M	I007	AF	133.5	0	0.0646115	0	NO
I135	G6_I121	G6	6.11362	M	I010	DSB	393.5	0	0.0600247	0	NO
I135	G6_I121	G6	6.11362	M	I011	INF	101	0	0.0263365	0	NO
I135	G6_I121	G6	6.11362	M	I014	INF	107	-0.0104167	0.013065	0	NO
I135	G6_I121	G6	6.11362	M	I019	BB	135.5	0	0	0	NO
I135	G6_I121	G6	6.11362	M	I021	SB	140	0	0	0	NO
I135	G6_I121	G6	6.11362	M	I024	BB	118	0	0.0371658	0	NO
I135	G6_I121	G6	6.11362	M	I025	Mother	119.5	0.0135642	0.21342	1	NO
I135	G6_I121	G6	6.11362	M	I040	AF	147.5	0	0.0127389	0	NO
I135	G6_I121	G6	6.11362	M	I042	SB	185	0	-0.0116223	0	NO
I135	G6_I121	G6	6.11362	M	I047	INF	115.5	0	0.0351975	0	NO
I135	G6_I121	G6	6.11362	M	I049	SAM	101	-0.0132937	0.0470238	0	NO
I135	G6_I121	G6	6.11362	M	I061	SAM	107	0	0.0412281	0	NO
I135	G6_I121	G6	6.11362	M	I062	BB	116	-0.0196078	-0.0119155	0	NO
I135	G6_I121	G6	6.11362	M	I07I	AF	125	0.0338983	0.101695	0	NO
I135	G6_I121	G6	6.11362	M	I076	AF	112.5	0	0.027027	0	NO
I135	G6_I121	G6	6.11362	M	I078	BB	120.5	0.00657895	0.00657895	0	NO
I135	G6_I121	G6	6.11362	M	I080	AF	112.5	0	0.0267857	0	NO
I135	G6_I121	G6	6.11362	M	I081	AF	124.5	-0.00724638	-0.000195848	0	NO
I135	G6_I121	G6	6.11362	M	I089	JUV	107	0	-0.0111111	0	NO
I135	G6_I121	G6	6.11362	M	I093	AF	105	0	0	0	NO
I135	G6_I121	G6	6.11362	M	I094	SB	377.5	0	-0.0018781	0	NO
I135	G6_I121	G6	6.11362	M	I099	AF	107	0	-0.023074	0	NO
I135	G6_I121	G6	6.11362	M	I104	SAF	92	0	0.0121951	0	NO
I135	G6_I121	G6	6.11362	M	I105	SB	178	-0.0144928	-0.0289855	0	NO
I135	G6_I121	G6	6.11362	M	I112	AF	117	0	0.0430976	0	NO
I135	G6_I121	G6	6.11362	M	I122	INF	101	0.0535714	0.25496	0	NO
I135	G6_I121	G6	6.11362	M	I126	SB	112.5	0	0	0	NO
I135	G6_I121	G6	6.11362	M	I127	BB	131	-0.0166667	-0.00962441	0	NO
I135	G6_I121	G6	6.11362	M	I137	AF	121.5	-0.015873	-0.0286935	0	NO
I135	G6_I121	G6	6.11362	M	I138	SAF	97.5	-0.000315657	0.0277778	0	NO
I135	G6_I121	G6	6.11362	M	I141	AF	133	0	0.0070922	0	NO
I138	G6_I121	G6	6.9295	F	I002	INF	101.5	0	0.00246403	0	NO
I138	G6_I121	G6	6.9295	F	I007	AF	125	0	0.0229916	0	NO
I138	G6_I121	G6	6.9295	F	I010	DSB	385	-0.00702576	-0.0272427	0	NO
I138	G6_I121	G6	6.9295	F	I011	INF	92.5	0	-0.0271536	0	NO
I138	G6_I121	G6	6.9295	F	I014	INF	98.5	0	-0.021349	0	NO
I138	G6_I121	G6	6.9295	F	I019	BB	127	0	-0.034204	0	NO
I138	G6_I121	G6	6.9295	F	I021	SB	131.5	0	0	0	NO
I138	G6_I121	G6	6.9295	F	I024	BB	109.5	0	0.0178571	0	NO
I138	G6_I121	G6	6.9295	F	I025	AF	111	-0.0285714	-0.0592334	0	NO
I138	G6_I121	G6	6.9295	F	I040	AF	139	0	-0.029089	0	NO
I138	G6_I121	G6	6.9295	F	I042	SB	176.5	0.00507614	0.0681374	0	NO
I138	G6_I121	G6	6.9295	F	I047	INF	107	-0.0934579	-0.0373832	0	NO
I138	G6_I121	G6	6.9295	F	I049	SAM	92.5	-0.0111111	-0.00175439	0	NO
I138	G6_I121	G6	6.9295	F	I061	SAM	98.5	-0.00877193	-0.0460791	0	NO
I138	G6_I121	G6	6.9295	F	I062	BB	107.5	0.0353982	0.0236856	0	NO
I138	G6_I121	G6	6.9295	F	I07I	AF	116.5	0	-0.0279778	0	NO
I138	G6_I121	G6	6.9295	F	I076	AF	104	0.00186637	0.0944382	0	NO
I138	G6_I121	G6	6.9295	F	I078	BB	112	0	-0.011236	0	NO
I138	G6_I121	G6	6.9295	F	I080	AF	104	0	0.0210526	0	NO
I138	G6_I121	G6	6.9295	F	I081	Mother	116	-0.0835646	-0.0897317	1	NO
I138	G6_I121	G6	6.9295	F	I089	JUV	98.5	0	0	0	NO
I138	G6_I121	G6	6.9295	F	I093	AF	96.5	0	0	0	NO
I138	G6_I121	G6	6.9295	F	I094	SB	369	0	0.00619195	0	NO
I138	G6_I121	G6	6.9295	F	I099	AF	98.5	0	0.0169492	0	NO
I138	G6_I121	G6	6.9295	F	I104	SAF	83.5	0	0	0	NO
I138	G6_I121	G6	6.9295	F	I105	SB	169.5	0	-0.00724638	0	NO
I138	G6_I121	G6	6.9295	F	I112	AF	108.5	-0.00740741	0.0383017	0	NO
I138	G6_I121	G6	6.9295	F	I122	INF	92.5	0	0.0309942	0	NO
I138	G6_I121	G6	6.9295	F	I126	SB	104	0	0	0	NO
I138	G6_I121	G6	6.9295	F	I127	BB	122.5	0	0.00766667	0	NO
I138	G6_I121	G6	6.9295	F	I135	SAM	97.5	-0.000315657	0.0277778	0	NO
I138	G6_I121	G6	6.9295	F	I137	AF	113	-0.00793651	0.014127	0	NO
I138	G6_I121	G6	6.9295	F	I141	AF	124.5	0	0	0	NO
I011	G6_I089	G6	5.73854	M	I019	SB	64.5	0	0	0	NO
I011	G6_I089	G6	5.73854	M	I035	JUV	72	-0.0238095	-0.0266106	0	NO
I011	G6_I089	G6	5.73854	M	I047	JUV	66	-0.0173611	-0.173611	0	NO
I011	G6_I089	G6	5.73854	M	I049	BB	57	0	-0.0918803	0	NO
I011	G6_I089	G6	5.73854	M	I07I	Mother	89.5	-0.117133	-0.128788	1	NO
I011	G6_I089	G6	5.73854	M	I073	INF	92.5	0	-0.0897436	0	NO
I011	G6_I089	G6	5.73854	M	I079	INF	84	0	-0.0590278	0	NO
I011	G6_I089	G6	5.73854	M	I111	INF	62	0	0.0843373	0	NO
I011	G6_I089	G6	5.73854	M	I112	AF	66	0	0.0104167	0	NO
I011	G6_I089	G6	5.73854	M	I122	JUV	81	0.00925926	-0.037037	0	NO
I011	G6_I089	G6	5.73854	M	I137	AF	88.5	0	-0.0600723	0	NO
I035	G6_I089	G6	4.10951	F	I011	JUV	72	-0.0238095	-0.0266106	0	NO
I035	G6_I089	G6	4.10951	F	I019	SB	70.5	0	-0.0208333	0	NO
I035	G6_I089	G6	4.10951	F	I047	JUV	72	0.00980392	-0.0616246	0	NO
I035	G6_I089	G6	4.10951	F	I049	BB	63	0	-0.0357143	0	NO
I035	G6_I089	G6	4.10951	F	I07I	AF	95.5	0	-0.047619	0	NO
I035	G6_I089	G6	4.10951	F	I073	INF	98.5	-0.0030552	0.114412	0	NO
I035	G6_I089	G6	4.10951	F	I079	INF	90	-0.0128205	0.0165913	0	NO
I035	G6_I089	G6	4.10951	F	I111	INF	68	0.068611	0.191728	0	NO
I035	G6_I089	G6	4.10951	F	I112	Mother	72	0.0966387	0.0420168	1	NO
I035	G6_I089	G6	4.10951	F	I122	JUV	87	-0.00526316	0.0149123	0	NO
I035	G6_I089	G6	4.10951	F	I137	AF	94.5	0	0.00426357	0	NO
I047	G6_I089	G6	5.41821	F	I011	JUV	66	-0.0173611	-0.173611	0	NO
I047	G6_I089	G6	5.41821	F	I019	SB	64.5	0	-0.0763547	0	NO
I047	G6_I089	G6	5.41821	F	I035	JUV	72	0.00980392	-0.0616246	0	NO
I047	G6_I089	G6	5.41821	F	I049	BB	57	-0.0277778	-0.0320513	0	NO
I047	G6_I089	G6	5.41821	F	I07I	AF	89.5	0	-0.0137918	0	NO
I047	G6_I089	G6	5.41821	F	I073	INF	92.5	-0.0128205	-0.0803978	0	NO
I047	G6_I089	G6	5.41821	F	I079	INF	84	0	0.0729167	0	NO
I047	G6_I089	G6	5.41821	F	I111	INF	62	0	0	0	NO
I047	G6_I089	G6	5.41821	F	I112	AF	66	0	0.0347222	0	NO
I047	G6_I089	G6	5.41821	F	I122	JUV	81	0	0.037037	0	NO
I047	G6_I089	G6	5.41821	F	I137	AF	88.5	0	0.0198735	0	NO
I122	G6_I089	G6	5.16359	M	I011	JUV	81	0.00925926	-0.037037	0	NO
I122	G6_I089	G6	5.16359	M	I019	SB	79.5	0	-0.00959596	0	NO
I122	G6_I089	G6	5.16359	M	I035	JUV	87	-0.00526316	0.0149123	0	NO
I122	G6_I089	G6	5.16359	M	I047	JUV	81	0	0.037037	0	NO
I122	G6_I089	G6	5.16359	M	I049	BB	72	0	-0.0111111	0	NO
I122	G6_I089	G6	5.16359	M	I07I	AF	104.5	0	-0.140024	0	NO
I122	G6_I089	G6	5.16359	M	I073	INF	107.5	-0.0208333	0.0111169	0	NO
I122	G6_I089	G6	5.16359	M	I079	INF	99	0	0.00925926	0	NO
I122	G6_I089	G6	5.16359	M	I111	INF	77	-0.0239072	0.0237288	0	NO
I122	G6_I089	G6	5.16359	M	I112	AF	81	-0.0185185	-0.111111	0	NO
I122	G6_I089	G6	5.16359	M	I137	AF	103.5	0	0.025	0	NO
I017	G6_I037	G6	2.85284	F	I002	BB	81	0	0.03125	0	NO
I017	G6_I037	G6	2.85284	F	I007	AF	69	0	-0.0555556	0	NO
I017	G6_I037	G6	2.85284	F	I010	DSB	345	0	0.00538462	0	NO
I017	G6_I037	G6	2.85284	F	I014	BB	72	0	0	0	NO
I017	G6_I037	G6	2.85284	F	I019	SB	329.5	-0.00821023	0.0855019	0	NO
I017	G6_I037	G6	2.85284	F	I025	AF	96	0	0.0263158	0	NO
I017	G6_I037	G6	2.85284	F	I031	INF	81	0.00980392	0.0911765	0	NO
I017	G6_I037	G6	2.85284	F	I032	AF	93	0	-0.00238095	0	NO
I017	G6_I037	G6	2.85284	F	I043	SB	72	0	0	0	NO
I017	G6_I037	G6	2.85284	F	I045	INF	80	-0.0206349	-0.0619048	0	NO
I017	G6_I037	G6	2.85284	F	I062	SB	81	0	0	0	NO
I017	G6_I037	G6	2.85284	F	I073	JUV	84	0	-0.0611111	0	NO
I017	G6_I037	G6	2.85284	F	I076	AF	108	0	0.01875	0	NO
I017	G6_I037	G6	2.85284	F	I080	AF	114	0	-0.000925926	0	NO
I017	G6_I037	G6	2.85284	F	I081	AF	105	0	-0.0722222	0	NO
I017	G6_I037	G6	2.85284	F	I086	INF	78	0.0196078	-0.0119826	0	NO
I017	G6_I037	G6	2.85284	F	I088	SAF	69	0	0.0119048	0	NO
I017	G6_I037	G6	2.85284	F	I092	Mother	93	-0.123932	0.042735	1	NO
I017	G6_I037	G6	2.85284	F	I111	JUV	66	0	0.0270655	0	NO
I017	G6_I037	G6	2.85284	F	I112	AF	93	0	0.22803	0	NO
I017	G6_I037	G6	2.85284	F	I122	BB	75	0	0.0111111	0	NO
I017	G6_I037	G6	2.85284	F	I124	INF	84	0	0.0590278	0	NO
I017	G6_I037	G6	2.85284	F	I131	SAM	87	0	0	0	NO
I017	G6_I037	G6	2.85284	F	I135	SB	87	0	-0.0454545	0	NO
I017	G6_I037	G6	2.85284	F	I148	INF	75	0	0.0729167	0	NO
I031	G6_I037	G6	3.68789	M	I002	BB	84	0	-0.0151515	0	NO
I031	G6_I037	G6	3.68789	M	I007	AF	72	0	0.0777778	0	NO
I031	G6_I037	G6	3.68789	M	I010	DSB	348	0.000909091	0.0211111	0	NO
I031	G6_I037	G6	3.68789	M	I014	BB	75	0	0	0	NO
I031	G6_I037	G6	3.68789	M	I017	INF	81	0.00980392	0.0911765	0	NO
I031	G6_I037	G6	3.68789	M	I019	SB	332.5	0	-0.03669	0	NO
I031	G6_I037	G6	3.68789	M	I025	AF	99	0	0.0282051	0	NO
I031	G6_I037	G6	3.68789	M	I032	AF	96	0	-0.192424	0	NO
I031	G6_I037	G6	3.68789	M	I043	SB	75	0	0	0	NO
I031	G6_I037	G6	3.68789	M	I045	INF	83	-0.00505952	0.0577381	0	NO
I031	G6_I037	G6	3.68789	M	I062	SB	84	0	0	0	NO
I031	G6_I037	G6	3.68789	M	I073	JUV	87	0.0105263	-0.0605263	0	NO
I031	G6_I037	G6	3.68789	M	I076	AF	111	0	0.016369	0	NO
I031	G6_I037	G6	3.68789	M	I080	AF	117	0	-0.026455	0	NO
I031	G6_I037	G6	3.68789	M	I081	AF	108	0	-0.0904762	0	NO
I031	G6_I037	G6	3.68789	M	I086	INF	81	0.00925926	0.0185185	0	NO
I031	G6_I037	G6	3.68789	M	I088	SAF	72	0	0.0222222	0	NO
I031	G6_I037	G6	3.68789	M	I092	AF	96	0	-0.0681511	0	NO
I031	G6_I037	G6	3.68789	M	I111	JUV	69	0	0.124339	0	NO
I031	G6_I037	G6	3.68789	M	I112	Mother	96	-0.0108225	0.0310245	1	NO
I031	G6_I037	G6	3.68789	M	I122	BB	78	0	0	0	NO
I031	G6_I037	G6	3.68789	M	I124	INF	87	0.00980392	0.0678105	0	NO
I031	G6_I037	G6	3.68789	M	I131	SAM	90	0	-0.00833333	0	NO
I031	G6_I037	G6	3.68789	M	I135	SB	90	0	-0.0366826	0	NO
I031	G6_I037	G6	3.68789	M	I148	INF	78	0.0206972	0.0620915	0	NO
I045	G6_I037	G6	3.42231	M	I002	BB	83	0	-0.0131579	0	NO
I045	G6_I037	G6	3.42231	M	I007	AF	71	0	-0.00280449	0	NO
I045	G6_I037	G6	3.42231	M	I010	DSB	347	-0.0102991	-0.0329805	0	NO
I045	G6_I037	G6	3.42231	M	I014	BB	74	0	0.00498084	0	NO
I045	G6_I037	G6	3.42231	M	I017	INF	80	-0.0206349	-0.0619048	0	NO
I045	G6_I037	G6	3.42231	M	I019	SB	331.5	0	-0.0414926	0	NO
I045	G6_I037	G6	3.42231	M	I025	AF	98	0	0.0627104	0	NO
I045	G6_I037	G6	3.42231	M	I031	INF	83	-0.00505952	0.0577381	0	NO
I045	G6_I037	G6	3.42231	M	I032	AF	95	0	0.00238095	0	NO
I045	G6_I037	G6	3.42231	M	I043	SB	74	0	0.0128205	0	NO
I045	G6_I037	G6	3.42231	M	I062	SB	83	0	-0.0131579	0	NO
I045	G6_I037	G6	3.42231	M	I073	JUV	86	-0.00448179	0.0719888	0	NO
I045	G6_I037	G6	3.42231	M	I076	Mother	110	-0.0120821	0.0769613	1	NO
I045	G6_I037	G6	3.42231	M	I080	AF	116	0	-0.0157597	0	NO
I045	G6_I037	G6	3.42231	M	I081	AF	107	0.0214035	0.200702	0	NO
I045	G6_I037	G6	3.42231	M	I086	INF	80	0.03125	-0.0104167	0	NO
I045	G6_I037	G6	3.42231	M	I088	SAF	71	0.025641	0.0641026	0	NO
I045	G6_I037	G6	3.42231	M	I092	AF	95	0	-0.00311943	0	NO
I045	G6_I037	G6	3.42231	M	I111	JUV	68	0.0277778	0.111111	0	NO
I045	G6_I037	G6	3.42231	M	I112	AF	95	0	0.0219298	0	NO
I045	G6_I037	G6	3.42231	M	I122	BB	77	0	0.0119048	0	NO
I045	G6_I037	G6	3.42231	M	I124	INF	86	0	0.15122	0	NO
I045	G6_I037	G6	3.42231	M	I131	SAM	89	0	0.0582011	0	NO
I045	G6_I037	G6	3.42231	M	I135	SB	89	0	0.00644995	0	NO
I045	G6_I037	G6	3.42231	M	I148	INF	77	0	0.130903	0	NO
I073	G6_I037	G6	4.76934	M	I002	BB	87	0	0.00925926	0	NO
I073	G6_I037	G6	4.76934	M	I007	AF	75	0	0	0	NO
I073	G6_I037	G6	4.76934	M	I010	DSB	351	0	0.0454726	0	NO
I073	G6_I037	G6	4.76934	M	I014	BB	78	0	0.00925926	0	NO
I073	G6_I037	G6	4.76934	M	I017	INF	84	0	-0.0611111	0	NO
I073	G6_I037	G6	4.76934	M	I019	SB	335.5	-0.00363636	-0.050404	0	NO
I073	G6_I037	G6	4.76934	M	I025	AF	102	0	0.0238095	0	NO
I073	G6_I037	G6	4.76934	M	I031	INF	87	0.0105263	-0.0605263	0	NO
I073	G6_I037	G6	4.76934	M	I032	Mother	99	-0.130435	-0.13913	1	NO
I073	G6_I037	G6	4.76934	M	I043	SB	78	0	0	0	NO
I073	G6_I037	G6	4.76934	M	I045	INF	86	-0.00448179	0.0719888	0	NO
I073	G6_I037	G6	4.76934	M	I062	SB	87	0	0.00925926	0	NO
I073	G6_I037	G6	4.76934	M	I076	AF	114	0	0.0142045	0	NO
I073	G6_I037	G6	4.76934	M	I080	AF	120	0	-0.003367	0	NO
I073	G6_I037	G6	4.76934	M	I081	AF	111	0	-0.0247475	0	NO
I073	G6_I037	G6	4.76934	M	I086	INF	84	-0.00974659	0.039961	0	NO
I073	G6_I037	G6	4.76934	M	I088	SAF	75	0.0208333	-0.143519	0	NO
I073	G6_I037	G6	4.76934	M	I092	AF	99	0	-0.146795	0	NO
I073	G6_I037	G6	4.76934	M	I111	JUV	72	-0.0185185	0	0	NO
I073	G6_I037	G6	4.76934	M	I112	AF	99	0	0.0454545	0	NO
I073	G6_I037	G6	4.76934	M	I122	BB	81	0	0.0323529	0	NO
I073	G6_I037	G6	4.76934	M	I124	INF	90	0.0555556	0.185185	0	NO
I073	G6_I037	G6	4.76934	M	I131	SAM	93	0	-0.0174603	0	NO
I073	G6_I037	G6	4.76934	M	I135	SB	93	0	-0.0439394	0	NO
I073	G6_I037	G6	4.76934	M	I148	INF	81	0.00925926	0.0277778	0	NO
I086	G6_I037	G6	2.24778	F	I002	BB	81	0	0.0294118	0	NO
I086	G6_I037	G6	2.24778	F	I007	Mother	69	-0.0319444	-0.0416667	1	NO
I086	G6_I037	G6	2.24778	F	I010	DSB	345	0	0.0298907	0	NO
I086	G6_I037	G6	2.24778	F	I014	BB	72	0	-0.0238095	0	NO
I086	G6_I037	G6	2.24778	F	I017	INF	78	0.0196078	-0.0119826	0	NO
I086	G6_I037	G6	2.24778	F	I019	SB	329.5	-0.0123058	-0.0327995	0	NO
I086	G6_I037	G6	2.24778	F	I025	AF	96	0	0.0194444	0	NO
I086	G6_I037	G6	2.24778	F	I031	INF	81	0.00925926	0.0185185	0	NO
I086	G6_I037	G6	2.24778	F	I032	AF	93	0	0.0117845	0	NO
I086	G6_I037	G6	2.24778	F	I043	SB	72	0	0	0	NO
I086	G6_I037	G6	2.24778	F	I045	INF	80	0.03125	-0.0104167	0	NO
I086	G6_I037	G6	2.24778	F	I062	SB	81	0	0	0	NO
I086	G6_I037	G6	2.24778	F	I073	JUV	84	-0.00974659	0.039961	0	NO
I086	G6_I037	G6	2.24778	F	I076	AF	108	0	0.0904762	0	NO
I086	G6_I037	G6	2.24778	F	I080	AF	114	-0.00980392	0.0345472	0	NO
I086	G6_I037	G6	2.24778	F	I081	AF	105	0	-0.00396825	0	NO
I086	G6_I037	G6	2.24778	F	I088	SAF	69	0.0111111	-0.0736111	0	NO
I086	G6_I037	G6	2.24778	F	I092	AF	93	0	0.0336257	0	NO
I086	G6_I037	G6	2.24778	F	I111	JUV	66	0.0119048	0.0714286	0	NO
I086	G6_I037	G6	2.24778	F	I112	AF	93	0	0.0111111	0	NO
I086	G6_I037	G6	2.24778	F	I122	BB	75	0	0.00231481	0	NO
I086	G6_I037	G6	2.24778	F	I124	INF	84	0.0196078	0.0516934	0	NO
I086	G6_I037	G6	2.24778	F	I131	SAM	87	0	0.0342593	0	NO
I086	G6_I037	G6	2.24778	F	I135	SB	87	-0.0166667	0.000877193	0	NO
I086	G6_I037	G6	2.24778	F	I148	INF	75	0.00857843	0.143382	0	NO
I088	G6_I037	G6	6.55441	F	I002	BB	72	0	0.0809524	0	NO
I088	G6_I037	G6	6.55441	F	I007	Mother	60	-0.0208333	-0.0763889	1	NO
I088	G6_I037	G6	6.55441	F	I010	DSB	336	0.0026455	-0.0457294	0	NO
I088	G6_I037	G6	6.55441	F	I014	BB	63	-0.0238095	-0.0595238	0	NO
I088	G6_I037	G6	6.55441	F	I017	INF	69	0	0.0119048	0	NO
I088	G6_I037	G6	6.55441	F	I019	SB	320.5	0	-0.0291102	0	NO
I088	G6_I037	G6	6.55441	F	I025	AF	87	0	-0.00408497	0	NO
I088	G6_I037	G6	6.55441	F	I031	INF	72	0	0.0222222	0	NO
I088	G6_I037	G6	6.55441	F	I032	AF	84	0	-0.148148	0	NO
I088	G6_I037	G6	6.55441	F	I043	SB	63	0	-0.0185185	0	NO
I088	G6_I037	G6	6.55441	F	I045	INF	71	0.025641	0.0641026	0	NO
I088	G6_I037	G6	6.55441	F	I062	SB	72	0	0.0238095	0	NO
I088	G6_I037	G6	6.55441	F	I073	JUV	75	0.0208333	-0.143519	0	NO
I088	G6_I037	G6	6.55441	F	I076	AF	99	0	-0.0444444	0	NO
I088	G6_I037	G6	6.55441	F	I080	AF	105	0	0.0163399	0	NO
I088	G6_I037	G6	6.55441	F	I081	AF	96	0	-0.0145503	0	NO
I088	G6_I037	G6	6.55441	F	I086	INF	69	0.0111111	-0.0736111	0	NO
I088	G6_I037	G6	6.55441	F	I092	AF	84	0	-0.00347222	0	NO
I088	G6_I037	G6	6.55441	F	I111	JUV	57	0	-0.00568182	0	NO
I088	G6_I037	G6	6.55441	F	I112	AF	84	0	0.0555556	0	NO
I088	G6_I037	G6	6.55441	F	I122	BB	66	0.0512821	0.19943	0	NO
I088	G6_I037	G6	6.55441	F	I124	INF	75	0.0119048	0.0443723	0	NO
I088	G6_I037	G6	6.55441	F	I131	SAM	78	0.0392157	0.0991285	0	NO
I088	G6_I037	G6	6.55441	F	I135	SB	78	0	-0.0229167	0	NO
I088	G6_I037	G6	6.55441	F	I148	INF	66	0	-0.00892857	0	NO
I111	G6_I037	G6	5.18275	F	I002	BB	69	0	0.0217949	0	NO
I111	G6_I037	G6	5.18275	F	I007	AF	57	0	0	0	NO
I111	G6_I037	G6	5.18275	F	I010	DSB	333	0	0.0446566	0	NO
I111	G6_I037	G6	5.18275	F	I014	BB	60	0	0.0128205	0	NO
I111	G6_I037	G6	5.18275	F	I017	INF	66	0	0.0270655	0	NO
I111	G6_I037	G6	5.18275	F	I019	SB	317.5	0	-0.107715	0	NO
I111	G6_I037	G6	5.18275	F	I025	Mother	84	0.0486111	0.197917	1	NO
I111	G6_I037	G6	5.18275	F	I031	INF	69	0	0.124339	0	NO
I111	G6_I037	G6	5.18275	F	I032	AF	81	0	0.0462963	0	NO
I111	G6_I037	G6	5.18275	F	I043	SB	60	0	0	0	NO
I111	G6_I037	G6	5.18275	F	I045	INF	68	0.0277778	0.111111	0	NO
I111	G6_I037	G6	5.18275	F	I062	SB	69	0	0.0128205	0	NO
I111	G6_I037	G6	5.18275	F	I073	JUV	72	-0.0185185	0	0	NO
I111	G6_I037	G6	5.18275	F	I076	AF	96	0	-0.0568627	0	NO
I111	G6_I037	G6	5.18275	F	I080	AF	102	0	-0.0392157	0	NO
I111	G6_I037	G6	5.18275	F	I081	AF	93	0	0.00980392	0	NO
I111	G6_I037	G6	5.18275	F	I086	INF	66	0.0119048	0.0714286	0	NO
I111	G6_I037	G6	5.18275	F	I088	SAF	57	0	-0.00568182	0	NO
I111	G6_I037	G6	5.18275	F	I092	AF	81	0	-0.00277778	0	NO
I111	G6_I037	G6	5.18275	F	I112	AF	81	0	-0.0205882	0	NO
I111	G6_I037	G6	5.18275	F	I122	BB	63	0	0.0277778	0	NO
I111	G6_I037	G6	5.18275	F	I124	INF	72	0.0128205	0.0617716	0	NO
I111	G6_I037	G6	5.18275	F	I131	SAM	75	0.0104167	0.0173611	0	NO
I111	G6_I037	G6	5.18275	F	I135	SB	75	0	-0.0666667	0	NO
I111	G6_I037	G6	5.18275	F	I148	INF	63	0	0.145833	0	NO
I124	G6_I037	G6	3.97262	F	I002	BB	87	0	0.00801282	0	NO
I124	G6_I037	G6	3.97262	F	I007	AF	75	0	-0.0400433	0	NO
I124	G6_I037	G6	3.97262	F	I010	DSB	351	0	0.0929487	0	NO
I124	G6_I037	G6	3.97262	F	I014	BB	78	0	0.0354167	0	NO
I124	G6_I037	G6	3.97262	F	I017	INF	84	0	0.0590278	0	NO
I124	G6_I037	G6	3.97262	F	I019	SB	335.5	0	-0.0184469	0	NO
I124	G6_I037	G6	3.97262	F	I025	AF	102	0	-0.0134503	0	NO
I124	G6_I037	G6	3.97262	F	I031	INF	87	0.00980392	0.0678105	0	NO
I124	G6_I037	G6	3.97262	F	I032	AF	99	0	0.0634921	0	NO
I124	G6_I037	G6	3.97262	F	I043	SB	78	0	0.047619	0	NO
I124	G6_I037	G6	3.97262	F	I045	INF	86	0	0.15122	0	NO
I124	G6_I037	G6	3.97262	F	I062	SB	87	0	-0.00240385	0	NO
I124	G6_I037	G6	3.97262	F	I073	JUV	90	0.0555556	0.185185	0	NO
I124	G6_I037	G6	3.97262	F	I076	AF	114	0	0	0	NO
I124	G6_I037	G6	3.97262	F	I080	Mother	120	-0.075	-0.00833333	1	NO
I124	G6_I037	G6	3.97262	F	I081	AF	111	0	-0.0142157	0	NO
I124	G6_I037	G6	3.97262	F	I086	INF	84	0.0196078	0.0516934	0	NO
I124	G6_I037	G6	3.97262	F	I088	SAF	75	0.0119048	0.0443723	0	NO
I124	G6_I037	G6	3.97262	F	I092	AF	99	0	0.00740741	0	NO
I124	G6_I037	G6	3.97262	F	I111	JUV	72	0.0128205	0.0617716	0	NO
I124	G6_I037	G6	3.97262	F	I112	AF	99	0	0.0371795	0	NO
I124	G6_I037	G6	3.97262	F	I122	BB	81	0	0.0222222	0	NO
I124	G6_I037	G6	3.97262	F	I131	SAM	93	0	0.0197368	0	NO
I124	G6_I037	G6	3.97262	F	I135	SB	93	0	0	0	NO
I124	G6_I037	G6	3.97262	F	I148	INF	81	0	-0.0293561	0	NO
I131	G6_I037	G6	7.69336	M	I002	BB	90	0.00877193	0.092504	0	NO
I131	G6_I037	G6	7.69336	M	I007	AF	78	0	-0.037037	0	NO
I131	G6_I037	G6	7.69336	M	I010	DSB	354	0.00245098	-0.0240196	0	NO
I131	G6_I037	G6	7.69336	M	I014	BB	81	0	-0.0932018	0	NO
I131	G6_I037	G6	7.69336	M	I017	INF	87	0	0	0	NO
I131	G6_I037	G6	7.69336	M	I019	SB	338.5	0	-0.0164631	0	NO
I131	G6_I037	G6	7.69336	M	I025	AF	105	0	-0.0308858	0	NO
I131	G6_I037	G6	7.69336	M	I031	INF	90	0	-0.00833333	0	NO
I131	G6_I037	G6	7.69336	M	I032	AF	102	0	0.0277778	0	NO
I131	G6_I037	G6	7.69336	M	I043	SB	81	-0.0333333	0.045098	0	NO
I131	G6_I037	G6	7.69336	M	I045	INF	89	0	0.0582011	0	NO
I131	G6_I037	G6	7.69336	M	I062	SB	90	0	0.0263158	0	NO
I131	G6_I037	G6	7.69336	M	I073	JUV	93	0	-0.0174603	0	NO
I131	G6_I037	G6	7.69336	M	I076	Mother	117	0	-0.0185688	1	NO
I131	G6_I037	G6	7.69336	M	I080	AF	123	0	-0.0112721	0	NO
I131	G6_I037	G6	7.69336	M	I081	AF	114	-0.0444444	0.0198068	0	NO
I131	G6_I037	G6	7.69336	M	I086	INF	87	0	0.0342593	0	NO
I131	G6_I037	G6	7.69336	M	I088	SAF	78	0.0392157	0.0991285	0	NO
I131	G6_I037	G6	7.69336	M	I092	AF	102	0	0.0189255	0	NO
I131	G6_I037	G6	7.69336	M	I111	JUV	75	0.0104167	0.0173611	0	NO
I131	G6_I037	G6	7.69336	M	I112	AF	102	0	0.0210804	0	NO
I131	G6_I037	G6	7.69336	M	I122	BB	84	0.0388889	0.227778	0	NO
I131	G6_I037	G6	7.69336	M	I124	INF	93	0	0.0197368	0	NO
I131	G6_I037	G6	7.69336	M	I135	SB	96	0	-0.0894661	0	NO
I131	G6_I037	G6	7.69336	M	I148	INF	84	0	-0.0185185	0	NO
I148	G6_I037	G6	2.29158	F	I002	BB	78	0	0.0520833	0	NO
I148	G6_I037	G6	2.29158	F	I007	AF	66	-0.0208333	-0.0922619	0	NO
I148	G6_I037	G6	2.29158	F	I010	DSB	342	0.0025641	0.0679226	0	NO
I148	G6_I037	G6	2.29158	F	I014	BB	69	0	0.0520833	0	NO
I148	G6_I037	G6	2.29158	F	I017	INF	75	0	0.0729167	0	NO
I148	G6_I037	G6	2.29158	F	I019	SB	326.5	0.00260417	-0.0318889	0	NO
I148	G6_I037	G6	2.29158	F	I025	Mother	93	-0.0760234	-0.243421	1	NO
I148	G6_I037	G6	2.29158	F	I031	INF	78	0.0206972	0.0620915	0	NO
I148	G6_I037	G6	2.29158	F	I032	AF	90	0	0.0634921	0	NO
I148	G6_I037	G6	2.29158	F	I043	SB	69	0	0	0	NO
I148	G6_I037	G6	2.29158	F	I045	INF	77	0	0.130903	0	NO
I148	G6_I037	G6	2.29158	F	I062	SB	78	0	0.0104167	0	NO
I148	G6_I037	G6	2.29158	F	I073	JUV	81	0.00925926	0.0277778	0	NO
I148	G6_I037	G6	2.29158	F	I076	AF	105	0	0.0833333	0	NO
I148	G6_I037	G6	2.29158	F	I080	AF	111	0	0.0318627	0	NO
I148	G6_I037	G6	2.29158	F	I081	AF	102	0.00833333	-0.0214286	0	NO
I148	G6_I037	G6	2.29158	F	I086	INF	75	0.00857843	0.143382	0	NO
I148	G6_I037	G6	2.29158	F	I088	SAF	66	0	-0.00892857	0	NO
I148	G6_I037	G6	2.29158	F	I092	AF	90	0	0.00925926	0	NO
I148	G6_I037	G6	2.29158	F	I111	JUV	63	0	0.145833	0	NO
I148	G6_I037	G6	2.29158	F	I112	AF	90	0.0333333	0.0583333	0	NO
I148	G6_I037	G6	2.29158	F	I122	BB	72	0	-0.062963	0	NO
I148	G6_I037	G6	2.29158	F	I124	INF	81	0	-0.0293561	0	NO
I148	G6_I037	G6	2.29158	F	I131	SAM	84	0	-0.0185185	0	NO
I148	G6_I037	G6	2.29158	F	I135	SB	84	0	-0.05	0	NO
I017	G6_I086	G6	4.12594	F	I002	BB	153	0	-0.0271739	0	NO
I017	G6_I086	G6	4.12594	F	I010	DSB	558	0.00374532	-0.0200394	0	NO
I017	G6_I086	G6	4.12594	F	I014	BB	165	0	-0.0333333	0	NO
I017	G6_I086	G6	4.12594	F	I019	SB	507	0.0292311	-0.00543835	0	NO
I017	G6_I086	G6	4.12594	F	I025	AF	168	-0.00617284	-0.0532141	0	NO
I017	G6_I086	G6	4.12594	F	I032	AF	168	0	-0.149638	0	NO
I017	G6_I086	G6	4.12594	F	I043	SB	156	0	-0.0123457	0	NO
I017	G6_I086	G6	4.12594	F	I044	AF	171	0.00574713	0.0909278	0	NO
I017	G6_I086	G6	4.12594	F	I045	JUV	150	0.00666667	0.14	0	NO
I017	G6_I086	G6	4.12594	F	I062	SB	165	0	0.000220459	0	NO
I017	G6_I086	G6	4.12594	F	I073	SAM	159	-0.0172414	-0.0347222	0	NO
I017	G6_I086	G6	4.12594	F	I076	AF	153	0	0.0933642	0	NO
I017	G6_I086	G6	4.12594	F	I080	AF	171	-0.0268817	-0.0519024	0	NO
I017	G6_I086	G6	4.12594	F	I081	AF	162	-0.0123457	-0.0802469	0	NO
I017	G6_I086	G6	4.12594	F	I092	Mother	153	-0.00231481	-0.0385802	1	NO
I017	G6_I086	G6	4.12594	F	I111	SAF	165	0.00641026	0.0484085	0	NO
I017	G6_I086	G6	4.12594	F	I122	BB	162	0.00641026	0.0018315	0	NO
I017	G6_I086	G6	4.12594	F	I124	JUV	150	-0.0178571	0.0270563	0	NO
I017	G6_I086	G6	4.12594	F	I131	BB	162	-0.0287356	-0.0337931	0	NO
I017	G6_I086	G6	4.12594	F	I148	INF	144	0	0.0547786	0	NO
I045	G6_I086	G6	4.69541	M	I002	BB	147	0	-0.00666667	0	NO
I045	G6_I086	G6	4.69541	M	I010	DSB	552	0.0185973	0.0537431	0	NO
I045	G6_I086	G6	4.69541	M	I014	BB	159	0	-0.00546059	0	NO
I045	G6_I086	G6	4.69541	M	I017	JUV	150	0.00666667	0.14	0	NO
I045	G6_I086	G6	4.69541	M	I019	SB	501	0.00625	-0.00100575	0	NO
I045	G6_I086	G6	4.69541	M	I025	AF	162	0	0	0	NO
I045	G6_I086	G6	4.69541	M	I032	AF	162	0	0.0521978	0	NO
I045	G6_I086	G6	4.69541	M	I043	SB	150	0	0.00641026	0	NO
I045	G6_I086	G6	4.69541	M	I044	AF	165	0.00555556	0.0544444	0	NO
I045	G6_I086	G6	4.69541	M	I062	SB	159	0	0.0528571	0	NO
I045	G6_I086	G6	4.69541	M	I073	SAM	153	0.0269231	0.115385	0	NO
I045	G6_I086	G6	4.69541	M	I076	Mother	147	-0.0169444	-0.0361111	1	NO
I045	G6_I086	G6	4.69541	M	I080	AF	165	0	-0.0648148	0	NO
I045	G6_I086	G6	4.69541	M	I081	AF	156	-0.00496032	0.0267857	0	NO
I045	G6_I086	G6	4.69541	M	I092	AF	147	0	0.0458333	0	NO
I045	G6_I086	G6	4.69541	M	I111	SAF	159	0	-0.002849	0	NO
I045	G6_I086	G6	4.69541	M	I122	BB	156	-0.00666667	-0.0106173	0	NO
I045	G6_I086	G6	4.69541	M	I124	JUV	144	-0.00666667	-0.0553623	0	NO
I045	G6_I086	G6	4.69541	M	I131	BB	156	0.0192308	-0.0320513	0	NO
I045	G6_I086	G6	4.69541	M	I148	INF	138	0.00724638	0.0362319	0	NO
I073	G6_I086	G6	6.04244	M	I002	BB	156	0	-0.00424788	0	NO
I073	G6_I086	G6	6.04244	M	I010	DSB	561	0	-0.00045861	0	NO
I073	G6_I086	G6	6.04244	M	I014	BB	168	0	0.031828	0	NO
I073	G6_I086	G6	6.04244	M	I017	JUV	159	-0.0172414	-0.0347222	0	NO
I073	G6_I086	G6	6.04244	M	I019	SB	510	0.0021097	-0.0215607	0	NO
I073	G6_I086	G6	6.04244	M	I025	AF	171	0	-0.0240148	0	NO
I073	G6_I086	G6	6.04244	M	I032	Mother	171	-0.0487654	-0.155556	1	NO
I073	G6_I086	G6	6.04244	M	I043	SB	159	0	0	0	NO
I073	G6_I086	G6	6.04244	M	I044	AF	174	0.00574713	0.045977	0	NO
I073	G6_I086	G6	6.04244	M	I045	JUV	153	0.0269231	0.115385	0	NO
I073	G6_I086	G6	6.04244	M	I062	SB	168	0	0.000425713	0	NO
I073	G6_I086	G6	6.04244	M	I076	AF	156	0	0.0168651	0	NO
I073	G6_I086	G6	6.04244	M	I080	AF	174	0	-0.0288462	0	NO
I073	G6_I086	G6	6.04244	M	I081	AF	165	-0.00595238	-0.029321	0	NO
I073	G6_I086	G6	6.04244	M	I092	AF	156	0.00694444	0.00297619	0	NO
I073	G6_I086	G6	6.04244	M	I111	SAF	168	-0.0102564	-0.0119658	0	NO
I073	G6_I086	G6	6.04244	M	I122	BB	165	-0.00574713	0.00397878	0	NO
I073	G6_I086	G6	6.04244	M	I124	JUV	153	0.00757576	0.149164	0	NO
I073	G6_I086	G6	6.04244	M	I131	BB	165	-0.00333333	0.0155556	0	NO
I073	G6_I086	G6	6.04244	M	I148	INF	147	-0.00617284	0.020202	0	NO
I111	G6_I086	G6	6.45585	F	I002	BB	162	0	-0.0287356	0	NO
I111	G6_I086	G6	6.45585	F	I010	DSB	567	0.003663	0.033752	0	NO
I111	G6_I086	G6	6.45585	F	I014	BB	174	0.00617284	0.100558	0	NO
I111	G6_I086	G6	6.45585	F	I017	JUV	165	0.00641026	0.0484085	0	NO
I111	G6_I086	G6	6.45585	F	I019	SB	516	0.00411523	0.0421924	0	NO
I111	G6_I086	G6	6.45585	F	I025	Mother	177	0.0503072	0.0101767	1	NO
I111	G6_I086	G6	6.45585	F	I032	AF	177	0	-0.0151341	0	NO
I111	G6_I086	G6	6.45585	F	I043	SB	165	0	-0.00595238	0	NO
I111	G6_I086	G6	6.45585	F	I044	AF	180	0	0.0131628	0	NO
I111	G6_I086	G6	6.45585	F	I045	JUV	159	0	-0.002849	0	NO
I111	G6_I086	G6	6.45585	F	I062	SB	174	0	0	0	NO
I111	G6_I086	G6	6.45585	F	I073	SAM	168	-0.0102564	-0.0119658	0	NO
I111	G6_I086	G6	6.45585	F	I076	AF	162	0	0.0627289	0	NO
I111	G6_I086	G6	6.45585	F	I080	AF	180	0	0.0453869	0	NO
I111	G6_I086	G6	6.45585	F	I081	AF	171	0	0.00492611	0	NO
I111	G6_I086	G6	6.45585	F	I092	AF	162	0	0.0141941	0	NO
I111	G6_I086	G6	6.45585	F	I122	BB	171	0.0119048	-0.00656814	0	NO
I111	G6_I086	G6	6.45585	F	I124	JUV	159	-0.0172414	-0.0627395	0	NO
I111	G6_I086	G6	6.45585	F	I131	BB	171	0.00617284	0.0339506	0	NO
I111	G6_I086	G6	6.45585	F	I148	INF	153	0.0408951	-0.0462963	0	NO
I124	G6_I086	G6	5.24572	F	I002	BB	147	-0.00595238	-0.0793651	0	NO
I124	G6_I086	G6	5.24572	F	I010	DSB	552	0.00574713	0.0357665	0	NO
I124	G6_I086	G6	5.24572	F	I014	BB	159	0	-0.0444444	0	NO
I124	G6_I086	G6	5.24572	F	I017	JUV	150	-0.0178571	0.0270563	0	NO
I124	G6_I086	G6	5.24572	F	I019	SB	501	0.004329	0.0100529	0	NO
I124	G6_I086	G6	5.24572	F	I025	AF	162	0.0432099	0.00617284	0	NO
I124	G6_I086	G6	5.24572	F	I032	AF	162	0	-0.0365517	0	NO
I124	G6_I086	G6	5.24572	F	I043	SB	150	0	-0.00617284	0	NO
I124	G6_I086	G6	5.24572	F	I044	AF	165	0.0308642	0.0870811	0	NO
I124	G6_I086	G6	5.24572	F	I045	JUV	144	-0.00666667	-0.0553623	0	NO
I124	G6_I086	G6	5.24572	F	I062	SB	159	0	-0.0202381	0	NO
I124	G6_I086	G6	5.24572	F	I073	SAM	153	0.00757576	0.149164	0	NO
I124	G6_I086	G6	5.24572	F	I076	AF	147	0	0.0173962	0	NO
I124	G6_I086	G6	5.24572	F	I080	Mother	165	-0.0347222	-0.0586918	1	NO
I124	G6_I086	G6	5.24572	F	I081	AF	156	0	-0.0916049	0	NO
I124	G6_I086	G6	5.24572	F	I092	AF	147	0	0.020202	0	NO
I124	G6_I086	G6	5.24572	F	I111	SAF	159	-0.0172414	-0.0627395	0	NO
I124	G6_I086	G6	5.24572	F	I122	BB	156	-0.0119048	-0.111111	0	NO
I124	G6_I086	G6	5.24572	F	I131	BB	156	0	0.0464768	0	NO
I124	G6_I086	G6	5.24572	F	I148	INF	138	0.00192308	0.0461538	0	NO
I148	G6_I086	G6	3.56468	F	I002	BB	141	0	-0.0177045	0	NO
I148	G6_I086	G6	3.56468	F	I010	DSB	546	-0.00526316	0.06951	0	NO
I148	G6_I086	G6	3.56468	F	I014	BB	153	0	0.0590062	0	NO
I148	G6_I086	G6	3.56468	F	I017	JUV	144	0	0.0547786	0	NO
I148	G6_I086	G6	3.56468	F	I019	SB	495	-0.00189394	-0.0995671	0	NO
I148	G6_I086	G6	3.56468	F	I025	Mother	156	0.0545679	0.0449383	1	NO
I148	G6_I086	G6	3.56468	F	I032	AF	156	0	0.0219753	0	NO
I148	G6_I086	G6	3.56468	F	I043	SB	144	0	-0.00666667	0	NO
I148	G6_I086	G6	3.56468	F	I044	AF	159	0.0121083	-0.0147198	0	NO
I148	G6_I086	G6	3.56468	F	I045	JUV	138	0.00724638	0.0362319	0	NO
I148	G6_I086	G6	3.56468	F	I062	SB	153	0	0.0602564	0	NO
I148	G6_I086	G6	3.56468	F	I073	SAM	147	-0.00617284	0.020202	0	NO
I148	G6_I086	G6	3.56468	F	I076	AF	141	0	-0.00333333	0	NO
I148	G6_I086	G6	3.56468	F	I080	AF	159	0.00694444	-0.0170019	0	NO
I148	G6_I086	G6	3.56468	F	I081	AF	150	0	0.02	0	NO
I148	G6_I086	G6	3.56468	F	I092	AF	141	0	-0.0381818	0	NO
I148	G6_I086	G6	3.56468	F	I111	SAF	153	0.0408951	-0.0462963	0	NO
I148	G6_I086	G6	3.56468	F	I122	BB	150	0.0352564	-0.0432692	0	NO
I148	G6_I086	G6	3.56468	F	I124	JUV	138	0.00192308	0.0461538	0	NO
[truncated: 1,593 more rows]
