# Supplementary material for: Social groups buffer maternal loss in mountain gorillas
Source: eLife. 2021 Mar 23;10:e62939. doi: 10.7554/eLife.62939 (PMC7987338; doi:10.7554/eLife.62939)
Supplement: Table 5—source data 1. [file elife-62939-table5-data1.xlsx]

## Sheet: Sheet1
IMMAI126E	Orphan_group	Group	AgeO	SexO	id	Cat	MeanDen	ContactChange	ProximityChange	AgeMate	Sibling
I001	G6_I115	G6	6.782	F	I002	INF	113.5	-0.016	-0.0123922	0	0
I001	G6_I115	G6	6.782	F	I007	AF	137	0	0.015873	0	0
I001	G6_I115	G6	6.782	F	I010	DSB	401	-0.000186828	-0.018745	0	0
I001	G6_I115	G6	6.782	F	I011	INF	104.5	0	0.0120946	0	0
I001	G6_I115	G6	6.782	F	I012	AF	92.5	0	0	0	0
I001	G6_I115	G6	6.782	F	I014	INF	110.5	-0.00884956	-0.0530973	0	0
I001	G6_I115	G6	6.782	F	I015	SAF	89.5	0	0.00507189	1	0
I001	G6_I115	G6	6.782	F	I019	BB	139	-0.00704225	-0.00704225	0	0
I001	G6_I115	G6	6.782	F	I020	AF	92	0	0.00402661	0	0
I001	G6_I115	G6	6.782	F	I021	SB	143.5	0.00840336	0.00874221	0	0
I001	G6_I115	G6	6.782	F	I022	AF	107.5	0	0.0426507	0	0
I001	G6_I115	G6	6.782	F	I024	BB	121.5	0	-0.00881664	0	0
I001	G6_I115	G6	6.782	F	I025	AF	120	0.0146417	0.132814	0	0
I001	G6_I115	G6	6.782	F	I040	AF	151	0	0.0277778	0	0
I001	G6_I115	G6	6.782	F	I041	SAM	98.5	-0.00854701	0.0755651	1	0
I001	G6_I115	G6	6.782	F	I042	SB	194.5	0	-0.00698781	0	0
I001	G6_I115	G6	6.782	F	I043	JUV	112	-0.0373832	0.00229064	1	0
I001	G6_I115	G6	6.782	F	I047	INF	116	0	0	0	0
I001	G6_I115	G6	6.782	F	I049	SAM	104.5	0	0.0175439	1	0
I001	G6_I115	G6	6.782	F	I054	BB	110	-0.008	0.104	1	0
I001	G6_I115	G6	6.782	F	I055	JUV	116.5	0	-0.0187316	0	0
I001	G6_I115	G6	6.782	F	I061	SAM	107.5	0.0196078	0.0799112	1	0
I001	G6_I115	G6	6.782	F	I062	BB	116.5	0	0.0105169	1	0
I001	G6_I115	G6	6.782	F	I069	SAM	104	-0.00943396	-0.0471698	1	0
I001	G6_I115	G6	6.782	F	I07I	AF	125.5	0	0.00929575	0	0
I001	G6_I115	G6	6.782	F	I072	AF	92	0	0.0135135	0	0
I001	G6_I115	G6	6.782	F	I076	AF	116	0	0	0	0
I001	G6_I115	G6	6.782	F	I078	BB	127	0	0.0121881	0	0
I001	G6_I115	G6	6.782	F	I080	AF	119	0	-0.00359239	0	0
I001	G6_I115	G6	6.782	F	I081	AF	125	0	0	0	0
I001	G6_I115	G6	6.782	F	I087	INF	107	0	-0.00410831	0	0
I001	G6_I115	G6	6.782	F	I089	JUV	110.5	0	0.0075	0	0
I001	G6_I115	G6	6.782	F	I093	AF	111.5	0	-0.0252101	0	0
I001	G6_I115	G6	6.782	F	I094	SB	387	0	-0.0168067	0	0
I001	G6_I115	G6	6.782	F	I099	AF	110.5	0	-0.00126069	0	0
I001	G6_I115	G6	6.782	F	I104	SAF	98.5	0	-0.0121516	1	0
I001	G6_I115	G6	6.782	F	I105	SB	181.5	0.0982429	0.10395	0	1
I001	G6_I115	G6	6.782	F	I112	AF	123.5	0.0205622	0.168575	0	0
I001	G6_I115	G6	6.782	F	I115	INF	125.5	-0.029703	-0.0359736	0	1
I001	G6_I115	G6	6.782	F	I118	SAF	107.5	0	0.0490196	1	0
I001	G6_I115	G6	6.782	F	I121	INF	110.5	0	0	0	0
I001	G6_I115	G6	6.782	F	I122	INF	101.5	0	0.0466667	0	0
I001	G6_I115	G6	6.782	F	I126	SB	122	-0.0171147	-0.0230422	0	0
I001	G6_I115	G6	6.782	F	I127	BB	137.5	0	-0.0239003	0	0
I001	G6_I115	G6	6.782	F	I135	SAM	109.5	0.0122031	0.0555193	1	0
I001	G6_I115	G6	6.782	F	I137	AF	125	0	0.0277778	0	0
I001	G6_I115	G6	6.782	F	I138	SAF	104	0	0.00645161	1	0
I001	G6_I115	G6	6.782	F	I140	AF	91.5	0	0	0	0
I001	G6_I115	G6	6.782	F	I141	AF	136.5	0	-0.0098541	0	0
I004	G9_I004	G9	2.91034	F	I018	JUV	384	-0.00573549	0.194163	1	0
I004	G9_I004	G9	2.91034	F	I048	SAF	386.5	0.00874608	0.101624	0	1
I004	G9_I004	G9	2.91034	F	I051	AF	450	0	0.0783983	0	0
I004	G9_I004	G9	2.91034	F	I130	JUV	410.5	0.0453496	0.197531	0	0
I004	G9_I004	G9	2.91034	F	I133	DSB	429	0.101918	0.176323	0	0
I004	G9_I004	G9	2.91034	F	I146	SB	420	-0.00877193	-0.00641161	0	0
I005	G5_I005	G5	6.38741	M	I030	JUV	282	-0.00551671	0.0164724	0	0
I005	G5_I005	G5	6.38741	M	I038	INF	276	0.0189641	0.111612	0	0
I005	G5_I005	G5	6.38741	M	I050	SAM	315	0.0295916	0.0819271	1	0
I005	G5_I005	G5	6.38741	M	I057	BB	294	-0.0303161	-0.00574713	0	0
I005	G5_I005	G5	6.38741	M	I064	AF	339	0	0.119934	0	0
I005	G5_I005	G5	6.38741	M	I065	AF	330	0	0.0564103	0	0
I005	G5_I005	G5	6.38741	M	I066	AF	315	-0.0116279	0.0980245	0	0
I005	G5_I005	G5	6.38741	M	I085	AF	312	0	0.0709596	0	0
I005	G5_I005	G5	6.38741	M	I090	SB	456	0	0.0891149	0	0
I005	G5_I005	G5	6.38741	M	I116	SB	339	0	0.0585659	0	0
I005	G5_I005	G5	6.38741	M	I117	AF	333	0	0.113805	0	0
I005	G5_I005	G5	6.38741	M	I132	JUV	288	-0.00103474	0.0855137	1	0
I005	G5_I005	G5	6.38741	M	I134	DSB	459	0.00793651	-0.0842823	0	0
I016	G7_I016	G7	4.03	F	I008	AF	134.5	0	0	0	0
I016	G7_I016	G7	4.03	F	I036	AF	146	0.0105263	-0.140557	0	1
I016	G7_I016	G7	4.03	F	I048	INF	136	-0.00980392	0.107843	0	0
I016	G7_I016	G7	4.03	F	I050	INF	140	0	0.0662651	0	0
I016	G7_I016	G7	4.03	F	I051	AF	192	0.00849673	-0.0588235	0	0
I016	G7_I016	G7	4.03	F	I053	AF	143	0	0.0597826	0	0
I016	G7_I016	G7	4.03	F	I056	AF	143	0	0.0263158	0	0
I016	G7_I016	G7	4.03	F	I057	INF	140	-0.0482328	-0.0604016	1	0
I016	G7_I016	G7	4.03	F	I060	JUV	148	-0.0421053	-0.0388583	1	0
I016	G7_I016	G7	4.03	F	I063	AF	140.5	0	0.0606419	0	0
I016	G7_I016	G7	4.03	F	I064	JUV	142.5	0.00558659	0.0167598	1	0
I016	G7_I016	G7	4.03	F	I065	AF	142	0	0.0478723	0	0
I016	G7_I016	G7	4.03	F	I066	JUV	140.5	0.0167598	0.0446927	1	0
I016	G7_I016	G7	4.03	F	I085	AF	160	0	0.00990099	0	0
I016	G7_I016	G7	4.03	F	I090	SB	334.5	0	-0.0140831	0	1
I016	G7_I016	G7	4.03	F	I097	AF	148.5	0	-0.058371	0	0
I016	G7_I016	G7	4.03	F	I110	DSB	423.5	0.0025641	-0.00273804	0	0
I016	G7_I016	G7	4.03	F	I116	BB	134.5	0	0.0300458	0	0
I016	G7_I016	G7	4.03	F	I117	AF	139.5	0	-0.019802	0	0
I016	G7_I016	G7	4.03	F	I133	SB	346	0.0220214	0.138554	0	0
I016	G7_I016	G7	4.03	F	I134	SB	158.5	0	-0.00833333	0	1
I016	G7_I016	G7	4.03	F	I142	SAF	143	0.0174419	0.0318237	0	0
I016	G7_I016	G7	4.03	F	I144	SB	158	0	-0.00757576	0	0
I016	G7_I016	G7	4.03	F	I146	SB	155.5	0	0.035533	0	1
I028	G2_I028	G2	4.85147	F	I009	DSB	372	0.0035461	0.0117896	0	0
I028	G2_I028	G2	4.85147	F	I015	AF	399	0	0.0694824	0	0
I028	G2_I028	G2	4.85147	F	I023	JUV	339	-0.0103755	0.092556	1	0
I028	G2_I028	G2	4.85147	F	I070	AF	450	0.00213675	0.207799	0	0
I028	G2_I028	G2	4.85147	F	I100	SAF	375	0.0274851	0.158368	1	0
I028	G2_I028	G2	4.85147	F	I102	SAM	348	-0.000770891	0.0651146	1	0
I029	G6_I037	G6	7.24709	M	I002	BB	90	0	0.05	1	0
I029	G6_I037	G6	7.24709	M	I007	AF	78	0	-0.166667	0	0
I029	G6_I037	G6	7.24709	M	I010	DSB	354	0	0.0139012	0	0
I029	G6_I037	G6	7.24709	M	I014	BB	81	0.00833333	-0.109524	0	0
I029	G6_I037	G6	7.24709	M	I017	INF	87	0	-0.0101852	0	0
I029	G6_I037	G6	7.24709	M	I019	SB	338.5	0	0.00465595	0	0
I029	G6_I037	G6	7.24709	M	I025	AF	105	0	0.0797101	0	0
I029	G6_I037	G6	7.24709	M	I031	INF	90	0	0.0132275	0	0
I029	G6_I037	G6	7.24709	M	I032	AF	102	0	0	0	0
I029	G6_I037	G6	7.24709	M	I037	INF	108	0	0.0153846	0	0
I029	G6_I037	G6	7.24709	M	I043	SB	81	0.00925926	0	0	0
I029	G6_I037	G6	7.24709	M	I045	INF	89	0	0.0476974	0	0
I029	G6_I037	G6	7.24709	M	I055	BB	89.5	0	0.0442478	0	0
I029	G6_I037	G6	7.24709	M	I062	SB	90	-0.0166667	-0.00833333	0	0
I029	G6_I037	G6	7.24709	M	I073	JUV	93	0	0.0395623	0	0
I029	G6_I037	G6	7.24709	M	I076	AF	117	-0.0666667	-0.0777778	0	0
I029	G6_I037	G6	7.24709	M	I080	AF	123	0	0.0179739	0	0
I029	G6_I037	G6	7.24709	M	I081	AF	114	0.0138889	0.0119048	0	0
I029	G6_I037	G6	7.24709	M	I084	INF	99	0	-0.0782609	0	1
I029	G6_I037	G6	7.24709	M	I086	INF	87	0.00793651	0.031746	0	0
I029	G6_I037	G6	7.24709	M	I088	SAF	78	0.00694444	0.106481	1	0
I029	G6_I037	G6	7.24709	M	I092	AF	102	0	-0.0138889	0	0
I029	G6_I037	G6	7.24709	M	I111	JUV	75	0	0.0477941	0	0
I029	G6_I037	G6	7.24709	M	I112	AF	102	0	-0.00277778	0	0
I029	G6_I037	G6	7.24709	M	I121	AF	96	0.0151515	0.104545	0	0
I029	G6_I037	G6	7.24709	M	I122	BB	84	-0.0185185	0.0672515	1	0
I029	G6_I037	G6	7.24709	M	I124	INF	93	0	-0.0795455	0	0
I029	G6_I037	G6	7.24709	M	I131	SAM	96	0.0322061	0.0901771	1	0
I029	G6_I037	G6	7.24709	M	I135	SB	96	-0.0333333	-0.0621212	0	0
I029	G6_I037	G6	7.24709	M	I148	INF	84	0	0.0333333	0	0
I030	G5_I030	G5	5.54141	F	I038	INF	279	-0.00353535	0.0209596	0	0
I030	G5_I030	G5	5.54141	F	I050	BB	273	-0.0507592	-0.173817	0	1
I030	G5_I030	G5	5.54141	F	I057	BB	273	0	-0.0697492	0	0
I030	G5_I030	G5	5.54141	F	I085	AF	294	-0.010101	-0.0485625	0	0
I030	G5_I030	G5	5.54141	F	I116	DSB	450	-0.00606061	0.0154705	0	0
I030	G5_I030	G5	5.54141	F	I117	AF	294	-0.0287993	-0.0756904	0	0
I030	G5_I030	G5	5.54141	F	I132	SAF	270	-0.0229634	0.0683434	1	0
I031	G6_I086	G6	4.96099	M	I002	BB	141	0	-0.0274758	0	0
I031	G6_I086	G6	4.96099	M	I010	DSB	546	0.0280899	0.0747856	0	0
I031	G6_I086	G6	4.96099	M	I014	BB	153	0	0.00666667	0	0
I031	G6_I086	G6	4.96099	M	I017	JUV	144	0	0.0694444	1	0
I031	G6_I086	G6	4.96099	M	I019	SB	495	0	0.0309342	0	0
I031	G6_I086	G6	4.96099	M	I025	AF	156	-0.00149925	-0.0994503	0	0
I031	G6_I086	G6	4.96099	M	I029	BB	156	0	0.00395062	0	0
I031	G6_I086	G6	4.96099	M	I032	AF	156	0	0.0288889	0	0
I031	G6_I086	G6	4.96099	M	I037	INF	159	0.02	0.152381	1	0
I031	G6_I086	G6	4.96099	M	I043	SB	144	0	-0.0162319	0	0
I031	G6_I086	G6	4.96099	M	I044	AF	159	0	0.00766284	0	0
I031	G6_I086	G6	4.96099	M	I045	JUV	138	-0.0184127	0.144762	1	0
I031	G6_I086	G6	4.96099	M	I062	SB	153	0	-0.00771605	0	0
I031	G6_I086	G6	4.96099	M	I073	SAM	147	0.0277778	0.0241667	1	0
I031	G6_I086	G6	4.96099	M	I076	AF	141	0	0.0407609	0	0
I031	G6_I086	G6	4.96099	M	I080	AF	159	0	0.019943	0	0
I031	G6_I086	G6	4.96099	M	I081	AF	150	0	0.0142244	0	0
I031	G6_I086	G6	4.96099	M	I084	JUV	144	-0.00782609	-0.0649275	1	0
I031	G6_I086	G6	4.96099	M	I086	INF	129	-0.0321068	0.0479798	1	0
I031	G6_I086	G6	4.96099	M	I092	AF	141	0	0.0259662	0	0
I031	G6_I086	G6	4.96099	M	I111	SAF	153	0.00641026	0.0720513	1	0
I031	G6_I086	G6	4.96099	M	I121	AF	285	0.0176768	0.069488	0	0
I031	G6_I086	G6	4.96099	M	I122	BB	150	-0.000534188	-0.0528846	0	0
I031	G6_I086	G6	4.96099	M	I124	JUV	138	0.0246212	0.0606061	1	0
I031	G6_I086	G6	4.96099	M	I131	BB	150	-0.00666667	0.06	0	0
I031	G6_I086	G6	4.96099	M	I148	INF	132	0.00757576	-0.0606061	1	0
I037	G6_I037	G6	2.705	F	I002	BB	102	0	-0.00505051	0	0
I037	G6_I037	G6	2.705	F	I007	AF	90	-0.0166667	-0.0333333	0	0
I037	G6_I037	G6	2.705	F	I010	DSB	366	-0.000920556	-0.0742889	0	0
I037	G6_I037	G6	2.705	F	I014	BB	93	0	0	0	0
I037	G6_I037	G6	2.705	F	I017	INF	99	0.0757576	0.371212	1	0
I037	G6_I037	G6	2.705	F	I019	SB	350.5	0.119149	0.483765	0	0
I037	G6_I037	G6	2.705	F	I025	AF	117	0	0.0604762	0	0
I037	G6_I037	G6	2.705	F	I029	SAM	108	0	0.0153846	0	0
I037	G6_I037	G6	2.705	F	I031	INF	102	0	0.0849802	1	0
I037	G6_I037	G6	2.705	F	I032	AF	114	0	-0.0505051	0	0
I037	G6_I037	G6	2.705	F	I043	SB	93	0	0	0	0
I037	G6_I037	G6	2.705	F	I045	INF	101	-0.00522139	-0.0574353	1	0
I037	G6_I037	G6	2.705	F	I055	BB	101.5	0	0	0	0
I037	G6_I037	G6	2.705	F	I062	SB	102	0	0	0	0
I037	G6_I037	G6	2.705	F	I073	JUV	105	0	0.0271465	0	0
I037	G6_I037	G6	2.705	F	I076	AF	129	0	0.102564	0	0
I037	G6_I037	G6	2.705	F	I080	AF	135	0	-0.0310391	0	0
I037	G6_I037	G6	2.705	F	I081	AF	126	0	0.0128205	0	0
I037	G6_I037	G6	2.705	F	I084	INF	111	0	0.0555556	1	0
I037	G6_I037	G6	2.705	F	I086	INF	99	-0.0166667	-0.0130435	1	0
I037	G6_I037	G6	2.705	F	I088	SAF	90	0	-0.0166667	0	0
I037	G6_I037	G6	2.705	F	I092	AF	114	0	0.248016	0	0
I037	G6_I037	G6	2.705	F	I111	JUV	87	0	0.0710526	0	0
I037	G6_I037	G6	2.705	F	I112	AF	114	0.00641026	0.0790598	0	0
I037	G6_I037	G6	2.705	F	I121	AF	108	0.0277778	0	0	0
I037	G6_I037	G6	2.705	F	I122	BB	96	0	0.047619	0	0
I037	G6_I037	G6	2.705	F	I124	INF	105	0.00757576	0.0629371	1	0
I037	G6_I037	G6	2.705	F	I131	SAM	108	0	-0.0151515	0	0
I037	G6_I037	G6	2.705	F	I135	SB	108	0	0	0	0
I037	G6_I037	G6	2.705	F	I148	INF	96	0	0.0969697	1	0
I041	G6_I115	G6	6.74333	M	I001	SAF	98.5	0.0146417	0.132814	1	0
I041	G6_I115	G6	6.74333	M	I002	INF	99	0.0150376	0.0776942	0	0
I041	G6_I115	G6	6.74333	M	I007	AF	122.5	0	0.0204785	0	0
I041	G6_I115	G6	6.74333	M	I010	DSB	386.5	0.00251256	-0.0139028	0	0
I041	G6_I115	G6	6.74333	M	I011	INF	90	-0.0104167	-0.0357143	0	0
I041	G6_I115	G6	6.74333	M	I012	AF	78	0	0	0	0
I041	G6_I115	G6	6.74333	M	I014	INF	96	-0.00980392	-0.0686275	0	0
I041	G6_I115	G6	6.74333	M	I015	SAF	75	0	0.0110294	1	0
I041	G6_I115	G6	6.74333	M	I019	BB	124.5	-0.0175439	-0.00272904	0	0
I041	G6_I115	G6	6.74333	M	I020	AF	77.5	-0.0913162	-0.117991	0	0
I041	G6_I115	G6	6.74333	M	I021	SB	129	0.00787402	0.00787402	0	0
I041	G6_I115	G6	6.74333	M	I022	AF	93	0	-0.0185185	0	0
I041	G6_I115	G6	6.74333	M	I024	BB	107	0	0.049505	0	0
I041	G6_I115	G6	6.74333	M	I025	AF	105.5	0	0.012973	0	0
I041	G6_I115	G6	6.74333	M	I040	AF	136.5	0	0.00892256	0	0
I041	G6_I115	G6	6.74333	M	I042	SB	180	0.00505051	0.0757576	0	0
I041	G6_I115	G6	6.74333	M	I043	JUV	97.5	0	0.114162	1	0
I041	G6_I115	G6	6.74333	M	I047	INF	101.5	0.0104167	-0.0248248	0	0
I041	G6_I115	G6	6.74333	M	I049	SAM	90	-0.0104167	-0.0342262	1	0
I041	G6_I115	G6	6.74333	M	I054	BB	95.5	0.0222222	0.0222222	1	0
I041	G6_I115	G6	6.74333	M	I055	JUV	102	0	-0.025463	0	0
I041	G6_I115	G6	6.74333	M	I061	SAM	93	-0.0263158	0.00438596	1	0
I041	G6_I115	G6	6.74333	M	I062	BB	102	0.00980392	0.00980392	1	0
I041	G6_I115	G6	6.74333	M	I069	SAM	89.5	-0.0709273	-0.066792	1	0
I041	G6_I115	G6	6.74333	M	I070	AF	81	0.0241228	0.128289	0	0
I041	G6_I115	G6	6.74333	M	I07I	AF	111	0	0.0485294	0	0
I041	G6_I115	G6	6.74333	M	I072	AF	77.5	0	0	0	0
I041	G6_I115	G6	6.74333	M	I076	AF	101.5	0	0.0421053	0	0
I041	G6_I115	G6	6.74333	M	I078	BB	112.5	0	-0.0105263	0	0
I041	G6_I115	G6	6.74333	M	I080	AF	104.5	-0.00990099	0.00861753	0	0
I041	G6_I115	G6	6.74333	M	I081	AF	110.5	0	-0.0100787	0	0
I041	G6_I115	G6	6.74333	M	I087	INF	92.5	0.0120482	-0.0106308	0	0
I041	G6_I115	G6	6.74333	M	I089	JUV	96	0	0.0104167	0	0
I041	G6_I115	G6	6.74333	M	I093	AF	97	0	0.00514626	0	0
I041	G6_I115	G6	6.74333	M	I094	SB	372.5	0	-0.00013702	0	0
I041	G6_I115	G6	6.74333	M	I099	AF	96	0	-0.0185185	0	0
I041	G6_I115	G6	6.74333	M	I104	SAF	84	0.0166667	0.0166667	1	0
I041	G6_I115	G6	6.74333	M	I105	SB	167	-0.0133333	-0.0345652	0	0
I041	G6_I115	G6	6.74333	M	I112	AF	109	0	0.0468977	0	0
I041	G6_I115	G6	6.74333	M	I115	INF	111	0	0.0107843	0	0
I041	G6_I115	G6	6.74333	M	I118	SAF	93	0.047619	0.0798319	1	0
I041	G6_I115	G6	6.74333	M	I121	INF	96	0	0.00718954	0	0
I041	G6_I115	G6	6.74333	M	I122	INF	87	-0.0111111	-0.0206349	0	0
I041	G6_I115	G6	6.74333	M	I126	SB	107.5	0	0	0	0
I041	G6_I115	G6	6.74333	M	I127	BB	123	0	-0.00358852	0	0
I041	G6_I115	G6	6.74333	M	I131	INF	65	0	0.0735867	0	0
I041	G6_I115	G6	6.74333	M	I135	SAM	95	-0.0196078	-0.00356506	1	0
I041	G6_I115	G6	6.74333	M	I137	AF	110.5	0.00840336	-0.035014	0	0
I041	G6_I115	G6	6.74333	M	I138	SAF	89.5	0.00318309	0.00292844	1	0
I041	G6_I115	G6	6.74333	M	I139	SB	150.5	0	-0.011583	0	0
I041	G6_I115	G6	6.74333	M	I140	AF	77	0	0	0	0
I041	G6_I115	G6	6.74333	M	I141	AF	122	0	0.00729927	0	0
I043	G6_I043	G6	5.65092	M	I001	SAF	102	-0.010101	0.0756133	1	0
I043	G6_I043	G6	5.65092	M	I002	INF	105.5	0.00900901	0.026036	0	0
I043	G6_I043	G6	5.65092	M	I007	AF	129	-0.00919287	-0.0139732	0	0
I043	G6_I043	G6	5.65092	M	I010	DSB	392	-0.00428266	-0.0189477	0	0
I043	G6_I043	G6	5.65092	M	I011	INF	96.5	-0.0113636	0.0838745	0	0
I043	G6_I043	G6	5.65092	M	I014	INF	99.5	-0.0263158	-0.0971331	1	0
I043	G6_I043	G6	5.65092	M	I019	BB	134	0	0.00305085	0	0
I043	G6_I043	G6	5.65092	M	I021	SB	135.5	0	0	0	0
I043	G6_I043	G6	5.65092	M	I024	BB	113.5	0	0.0445865	0	0
I043	G6_I043	G6	5.65092	M	I025	AF	112	0	0.0816327	0	0
I043	G6_I043	G6	5.65092	M	I040	AF	137	0	-0.023622	0	0
I043	G6_I043	G6	5.65092	M	I041	SAM	90.5	0	0.109017	1	0
I043	G6_I043	G6	5.65092	M	I042	SB	177.5	0	-0.0361446	0	0
I043	G6_I043	G6	5.65092	M	I047	INF	108	0	0	0	0
I043	G6_I043	G6	5.65092	M	I049	SAM	102.5	-0.0121951	0.0243902	1	0
I043	G6_I043	G6	5.65092	M	I054	BB	99	0.00813008	0.0284553	0	0
I043	G6_I043	G6	5.65092	M	I055	JUV	108.5	0	0	1	0
I043	G6_I043	G6	5.65092	M	I061	SAM	93.5	-0.0113636	-0.00250822	1	0
I043	G6_I043	G6	5.65092	M	I062	BB	111.5	0.010101	0.0669192	0	0
I043	G6_I043	G6	5.65092	M	I069	SAM	93.5	-0.0121951	0.032987	0	0
I043	G6_I043	G6	5.65092	M	I07I	AF	114.5	0	0.0845528	0	0
I043	G6_I043	G6	5.65092	M	I076	AF	108	0	0.0726065	0	0
I043	G6_I043	G6	5.65092	M	I078	BB	119	0	0.0164666	0	0
I043	G6_I043	G6	5.65092	M	I080	AF	111	0	0.00636943	0	0
I043	G6_I043	G6	5.65092	M	I081	AF	117	0	0.027027	0	0
I043	G6_I043	G6	5.65092	M	I087	JUV	102	0	0.0480769	1	0
I043	G6_I043	G6	5.65092	M	I089	JUV	96.5	0	-0.0241903	1	0
I043	G6_I043	G6	5.65092	M	I093	AF	97.5	0	0.0162602	0	0
I043	G6_I043	G6	5.65092	M	I094	SB	370	0	0.0136986	0	0
I043	G6_I043	G6	5.65092	M	I104	SAF	84.5	0	-0.0117647	1	0
I043	G6_I043	G6	5.65092	M	I105	SB	176.5	0	0.0266667	0	0
I043	G6_I043	G6	5.65092	M	I112	AF	115.5	0	-0.00274465	0	0
I043	G6_I043	G6	5.65092	M	I115	INF	111.5	0	0.0323289	0	0
I043	G6_I043	G6	5.65092	M	I118	SAF	96.5	0.0070922	-0.0326068	1	0
I043	G6_I043	G6	5.65092	M	I121	INF	99.5	0	0.0174687	1	0
I043	G6_I043	G6	5.65092	M	I122	INF	93.5	-0.0131579	-0.0413992	0	0
I043	G6_I043	G6	5.65092	M	I126	SB	105.5	0	-0.0560692	0	0
I043	G6_I043	G6	5.65092	M	I127	BB	129.5	0	0	0	0
I043	G6_I043	G6	5.65092	M	I135	SAM	101.5	-0.0340909	0	1	0
I043	G6_I043	G6	5.65092	M	I137	AF	117	0.0173913	0.0248024	0	0
I043	G6_I043	G6	5.65092	M	I138	SAF	90	-0.0119048	0.0282991	1	0
I043	G6_I043	G6	5.65092	M	I141	AF	122.5	0	-0.0520833	0	0
I048	G9_I004	G9	6.73238	F	I004	INF	386.5	-0.0177305	0	0	1
I048	G9_I004	G9	6.73238	F	I018	JUV	362.5	0.0214133	0.20492	1	0
I048	G9_I004	G9	6.73238	F	I051	AF	428.5	0	0.0251266	0	0
I048	G9_I004	G9	6.73238	F	I130	JUV	389	0.0421935	0.23174	1	0
I048	G9_I004	G9	6.73238	F	I133	DSB	407.5	0.00980614	0.168628	0	0
I048	G9_I004	G9	6.73238	F	I146	SB	398.5	0	-0.00959125	0	0
I052	G4_I052	G4	5.76591	M	I013	JUV	216	0.0467949	0.191026	1	0
I052	G4_I052	G4	5.76591	M	I027	SAF	225	-0.0339506	0.0229277	1	0
I052	G4_I052	G4	5.76591	M	I033	BB	222	-0.0115741	0.00462963	0	0
I052	G4_I052	G4	5.76591	M	I059	DSB	315	0.00356125	0.103039	0	0
I052	G4_I052	G4	5.76591	M	I075	AF	246	0	-0.00135102	0	0
I052	G4_I052	G4	5.76591	M	I095	INF	216	0.0418736	0.171632	0	0
I052	G4_I052	G4	5.76591	M	I103	JUV	201	0.0617647	0.104706	1	0
I052	G4_I052	G4	5.76591	M	I106	SAM	231	-0.0343691	-0.110483	1	0
I052	G4_I052	G4	5.76591	M	I118	AF	228	-0.00909091	0.0251082	0	0
I052	G4_I052	G4	5.76591	M	I119	BB	213	-0.0226046	-0.0345816	0	1
I052	G4_I052	G4	5.76591	M	I145	SB	324	-0.00617284	-0.162551	0	0
I055	G6_I055	G6	4.36413	M	I001	SAF	119.5	0	0.0186916	0	0
I055	G6_I055	G6	4.36413	M	I002	INF	123	0	0.061683	1	0
I055	G6_I055	G6	4.36413	M	I007	AF	143	0	0	0	0
I055	G6_I055	G6	4.36413	M	I010	DSB	343	-0.00170642	-0.0154128	0	0
I055	G6_I055	G6	4.36413	M	I011	INF	111	0	0.00353535	1	0
I055	G6_I055	G6	4.36413	M	I012	AF	123	0	0.0939542	0	0
I055	G6_I055	G6	4.36413	M	I014	INF	116.5	0	0.0111111	1	0
I055	G6_I055	G6	4.36413	M	I015	SAF	114	0.0168651	0.215278	1	0
I055	G6_I055	G6	4.36413	M	I019	BB	144	0	-0.00641026	0	0
I055	G6_I055	G6	4.36413	M	I020	AF	101.5	0	0	0	0
I055	G6_I055	G6	4.36413	M	I021	BB	140.5	0	0.00446104	0	0
I055	G6_I055	G6	4.36413	M	I022	AF	129	0	0	0	0
I055	G6_I055	G6	4.36413	M	I024	BB	119.5	-0.00694444	0.0633772	0	0
I055	G6_I055	G6	4.36413	M	I025	AF	126.5	0.026087	0.026087	0	0
I055	G6_I055	G6	4.36413	M	I040	AF	142.5	0	0.00775194	0	0
I055	G6_I055	G6	4.36413	M	I041	SAM	108	0	0.0295429	0	0
I055	G6_I055	G6	4.36413	M	I042	SB	174	0	0	0	0
I055	G6_I055	G6	4.36413	M	I043	JUV	122	-0.00641026	0.016317	1	0
I055	G6_I055	G6	4.36413	M	I047	INF	119.5	0	0.00177004	0	0
I055	G6_I055	G6	4.36413	M	I049	JUV	114	0	0.0333333	1	0
I055	G6_I055	G6	4.36413	M	I054	BB	116.5	0.00327994	0.00640732	0	1
I055	G6_I055	G6	4.36413	M	I061	JUV	117	0	0.0104167	1	0
I055	G6_I055	G6	4.36413	M	I062	BB	120	0	0.0185185	0	0
I055	G6_I055	G6	4.36413	M	I069	SAM	116.5	0	0.0238095	0	0
I055	G6_I055	G6	4.36413	M	I070	AF	116.5	0	0.0063689	0	0
I055	G6_I055	G6	4.36413	M	I07I	AF	138	0	-0.00641026	0	0
I055	G6_I055	G6	4.36413	M	I072	AF	110.5	0	0	0	0
I055	G6_I055	G6	4.36413	M	I076	AF	123	0	0	0	0
I055	G6_I055	G6	4.36413	M	I077	SB	128.5	0	0	0	0
I055	G6_I055	G6	4.36413	M	I078	BB	119.5	0.0224719	0.0207491	0	0
I055	G6_I055	G6	4.36413	M	I080	AF	125.5	0	0.101668	0	0
I055	G6_I055	G6	4.36413	M	I081	AF	135	0	0	0	0
I055	G6_I055	G6	4.36413	M	I087	INF	116.5	0	0.0111111	1	0
I055	G6_I055	G6	4.36413	M	I089	INF	111	0.0245726	0.0667735	1	0
I055	G6_I055	G6	4.36413	M	I091	AF	138	0	0.00757576	0	0
I055	G6_I055	G6	4.36413	M	I093	AF	131	0	0.00943396	0	0
I055	G6_I055	G6	4.36413	M	I094	SB	327.5	-0.000944028	0.101671	0	0
I055	G6_I055	G6	4.36413	M	I099	AF	132	0	0	0	0
I055	G6_I055	G6	4.36413	M	I104	SAF	125	0.0175439	0.0466976	0	0
I055	G6_I055	G6	4.36413	M	I105	BB	150	0	0.00793651	0	0
I055	G6_I055	G6	4.36413	M	I112	AF	133.5	0	0	0	0
I055	G6_I055	G6	4.36413	M	I115	INF	117	0	0.0111111	1	0
I055	G6_I055	G6	4.36413	M	I118	SAF	117	0	0	0	0
I055	G6_I055	G6	4.36413	M	I121	INF	114	0	0	1	0
I055	G6_I055	G6	4.36413	M	I122	INF	108	0	0.0333333	0	0
I055	G6_I055	G6	4.36413	M	I126	SB	116.5	0	-0.0387097	0	0
I055	G6_I055	G6	4.36413	M	I127	BB	129	0.00833333	-0.00615942	0	0
I055	G6_I055	G6	4.36413	M	I135	JUV	122	0	0.0425119	1	0
I055	G6_I055	G6	4.36413	M	I137	AF	135	0	0.01	0	0
I055	G6_I055	G6	4.36413	M	I138	SAF	117	0	0.0194175	0	0
I055	G6_I055	G6	4.36413	M	I139	SB	207.5	0	-0.017094	0	0
I055	G6_I055	G6	4.36413	M	I140	AF	113	0	0.02	0	0
I055	G6_I055	G6	4.36413	M	I141	AF	119.5	0	0.0654206	0	0
I069	G6_I087	G6	7.81109	M	I001	SAF	104.5	-0.019802	0.00476714	1	0
I069	G6_I087	G6	7.81109	M	I002	INF	105	0	0.0239651	0	0
I069	G6_I087	G6	7.81109	M	I007	AF	123	0	0.0277778	0	0
I069	G6_I087	G6	7.81109	M	I010	DSB	390	0	-0.00217553	0	1
I069	G6_I087	G6	7.81109	M	I011	INF	93	0.0104167	0.0715278	0	0
I069	G6_I087	G6	7.81109	M	I014	INF	99	0	0.0607769	0	0
I069	G6_I087	G6	7.81109	M	I019	BB	136.5	-0.0227273	-0.0175693	0	0
I069	G6_I087	G6	7.81109	M	I021	SB	138	0.00662252	0.0198675	0	0
I069	G6_I087	G6	7.81109	M	I024	BB	116	0	0.0129998	0	0
I069	G6_I087	G6	7.81109	M	I025	AF	108.5	0	-0.0258621	0	0
I069	G6_I087	G6	7.81109	M	I040	AF	133.5	0	-0.0218855	0	1
I069	G6_I087	G6	7.81109	M	I041	SAM	98.5	-0.0506743	-0.000632111	1	0
I069	G6_I087	G6	7.81109	M	I042	SB	171	0	0.080625	0	1
I069	G6_I087	G6	7.81109	M	I043	JUV	96.5	-0.0113636	0.106926	0	0
I069	G6_I087	G6	7.81109	M	I047	INF	101.5	0	-0.0560748	0	0
I069	G6_I087	G6	7.81109	M	I049	SAM	99	-0.00313283	-0.0313283	1	0
I069	G6_I087	G6	7.81109	M	I054	BB	95.5	0	0	1	0
I069	G6_I087	G6	7.81109	M	I055	JUV	102	0	0.00694444	0	0
I069	G6_I087	G6	7.81109	M	I061	SAM	105	-0.0104167	0.0564693	1	0
I069	G6_I087	G6	7.81109	M	I062	BB	105	-0.0196078	-0.0713508	1	0
I069	G6_I087	G6	7.81109	M	I07I	AF	114	0	0.0994318	0	0
I069	G6_I087	G6	7.81109	M	I076	AF	110.5	0	0.037957	0	0
I069	G6_I087	G6	7.81109	M	I078	BB	112.5	0	0	1	0
I069	G6_I087	G6	7.81109	M	I080	AF	104.5	0	0.0980392	0	0
I069	G6_I087	G6	7.81109	M	I081	AF	116.5	0	-0.00292529	0	0
I069	G6_I087	G6	7.81109	M	I087	JUV	98.5	-0.0350987	-0.0936656	0	1
I069	G6_I087	G6	7.81109	M	I089	JUV	102	0	0.015873	0	0
I069	G6_I087	G6	7.81109	M	I093	AF	91	-0.00847458	-0.0111229	0	0
I069	G6_I087	G6	7.81109	M	I094	SB	363.5	0	0.00765808	0	0
I069	G6_I087	G6	7.81109	M	I105	SB	167	0	0.00232523	0	0
I069	G6_I087	G6	7.81109	M	I112	AF	109	0	0	0	0
I069	G6_I087	G6	7.81109	M	I115	INF	108	0	-0.00833333	0	0
I069	G6_I087	G6	7.81109	M	I118	SAF	102	-0.0208333	-0.0138889	1	0
I069	G6_I087	G6	7.81109	M	I121	JUV	102	0	0.0490196	0	0
I069	G6_I087	G6	7.81109	M	I122	INF	104.5	-0.0238095	-0.039619	0	0
I069	G6_I087	G6	7.81109	M	I126	SB	99	0	0	0	0
I069	G6_I087	G6	7.81109	M	I127	BB	122.5	0	-0.009	0	0
I069	G6_I087	G6	7.81109	M	I131	INF	79	0.0430108	0.0889992	0	0
I069	G6_I087	G6	7.81109	M	I135	SAM	101	-0.00990099	0.029703	1	0
I069	G6_I087	G6	7.81109	M	I137	AF	107.5	0	0.0991228	0	0
I069	G6_I087	G6	7.81109	M	I138	SAF	86.5	-0.00970874	-0.0399445	1	0
I069	G6_I087	G6	7.81109	M	I141	AF	119	0	-0.0176991	0	0
I082	G3_I082	G3	4.59411	M	I006	AF	417	0.0181611	0.0196139	0	0
I082	G3_I082	G3	4.59411	M	I034	AF	408	-0.00578704	-0.0144676	0	0
I082	G3_I082	G3	4.59411	M	I042	DSB	420	0.137933	0.119915	0	0
I082	G3_I082	G3	4.59411	M	I046	AF	408	0.00520833	0.068287	0	0
I082	G3_I082	G3	4.59411	M	I054	SB	399	0	-0.00200666	0	0
I082	G3_I082	G3	4.59411	M	I058	INF	399	0.0748677	0.120899	1	0
I082	G3_I082	G3	4.59411	M	I074	AF	408	0.0251736	-0.0138889	0	0
I082	G3_I082	G3	4.59411	M	I083	AF	432	0.0158454	-0.135749	0	0
I082	G3_I082	G3	4.59411	M	I107	INF	407.5	0.051748	0.104551	0	0
I084	G6_I037	G6	3.19233	F	I002	BB	93	0	-0.0102339	0	0
I084	G6_I037	G6	3.19233	F	I007	AF	81	0	0.0617647	0	0
I084	G6_I037	G6	3.19233	F	I010	DSB	357	0.00735294	0.0424837	0	0
I084	G6_I037	G6	3.19233	F	I014	BB	84	0	-0.0185185	0	0
I084	G6_I037	G6	3.19233	F	I017	INF	90	0.0175439	0.107656	1	0
I084	G6_I037	G6	3.19233	F	I019	SB	341.5	0	0.0695809	0	0
I084	G6_I037	G6	3.19233	F	I025	AF	108	0	0.0367965	0	0
I084	G6_I037	G6	3.19233	F	I029	SAM	99	0	-0.0782609	0	1
I084	G6_I037	G6	3.19233	F	I031	INF	93	0.00151515	0.169697	1	0
I084	G6_I037	G6	3.19233	F	I032	AF	105	0	0.0486111	0	0
I084	G6_I037	G6	3.19233	F	I037	INF	111	0	0.0555556	1	0
I084	G6_I037	G6	3.19233	F	I043	SB	84	0	-0.00534759	0	0
I084	G6_I037	G6	3.19233	F	I045	INF	92	0	0.123294	1	0
I084	G6_I037	G6	3.19233	F	I055	BB	92.5	0	0	0	0
I084	G6_I037	G6	3.19233	F	I062	SB	93	0	0.0350877	0	0
I084	G6_I037	G6	3.19233	F	I073	JUV	96	0	0.002886	1	0
I084	G6_I037	G6	3.19233	F	I076	AF	120	0	0.0507246	0	0
I084	G6_I037	G6	3.19233	F	I080	AF	126	0	0.0636918	0	0
I084	G6_I037	G6	3.19233	F	I081	AF	117	0	0.00407609	0	0
I084	G6_I037	G6	3.19233	F	I086	INF	90	0	0.0833333	1	0
I084	G6_I037	G6	3.19233	F	I088	SAF	81	0	0.10098	0	0
I084	G6_I037	G6	3.19233	F	I092	AF	105	0	0.0198413	0	0
I084	G6_I037	G6	3.19233	F	I111	JUV	78	0.0104167	0.108333	1	0
I084	G6_I037	G6	3.19233	F	I112	AF	105	0	-0.0138889	0	0
I084	G6_I037	G6	3.19233	F	I121	AF	99	0.031746	0.0833333	0	0
I084	G6_I037	G6	3.19233	F	I122	BB	87	-0.0151515	-0.026936	0	0
I084	G6_I037	G6	3.19233	F	I124	INF	96	-0.0128205	0.0748988	1	0
I084	G6_I037	G6	3.19233	F	I131	SAM	99	0	0.0757576	0	0
I084	G6_I037	G6	3.19233	F	I135	SB	99	0	0.015873	0	0
I084	G6_I037	G6	3.19233	F	I148	INF	87	0.00877193	0.0552632	1	0
I086	G6_I086	G6	3.52088	F	I002	BB	138	-0.00666667	-0.113333	0	0
I086	G6_I086	G6	3.52088	F	I010	DSB	543	0.00205837	-0.0121668	0	0
I086	G6_I086	G6	3.52088	F	I014	BB	150	0	-0.0359635	0	0
I086	G6_I086	G6	3.52088	F	I017	JUV	141	-0.0190909	0.115758	1	0
I086	G6_I086	G6	3.52088	F	I019	SB	492	0.0372941	0.150371	0	0
I086	G6_I086	G6	3.52088	F	I025	AF	153	0.0185185	0.0231481	0	0
I086	G6_I086	G6	3.52088	F	I029	BB	153	0	-0.00336439	0	0
I086	G6_I086	G6	3.52088	F	I031	JUV	129	-0.0321068	0.0479798	1	0
I086	G6_I086	G6	3.52088	F	I032	AF	153	0.00666667	0.0353846	0	0
I086	G6_I086	G6	3.52088	F	I037	INF	156	0.0102449	0.216142	1	0
I086	G6_I086	G6	3.52088	F	I043	SB	141	0	-0.013587	0	0
I086	G6_I086	G6	3.52088	F	I044	AF	156	0.0185185	0.122469	0	0
I086	G6_I086	G6	3.52088	F	I045	JUV	135	-0.0158103	-0.00658762	1	0
I086	G6_I086	G6	3.52088	F	I062	SB	150	0	-0.0333333	0	0
I086	G6_I086	G6	3.52088	F	I073	SAM	144	-0.00407925	0.0402098	0	0
I086	G6_I086	G6	3.52088	F	I076	AF	138	0	0.030303	0	0
I086	G6_I086	G6	3.52088	F	I080	AF	156	0	0.0128968	0	0
I086	G6_I086	G6	3.52088	F	I081	AF	147	0	-0.00944444	0	0
I086	G6_I086	G6	3.52088	F	I084	JUV	141	0.0292874	0.163345	1	0
I086	G6_I086	G6	3.52088	F	I092	AF	138	0.00757576	0.0984848	0	0
I086	G6_I086	G6	3.52088	F	I111	SAF	150	0.00747863	0.0395299	0	0
I086	G6_I086	G6	3.52088	F	I121	AF	282	0.00520833	0.00486111	0	0
I086	G6_I086	G6	3.52088	F	I122	BB	147	0	-0.0244444	0	0
I086	G6_I086	G6	3.52088	F	I124	JUV	135	-0.0266667	-0.02	1	0
I086	G6_I086	G6	3.52088	F	I131	BB	147	0	0.0242475	0	0
I086	G6_I086	G6	3.52088	F	I148	INF	129	0.00217391	-0.120652	1	0
I087	G6_I087	G6	4.12047	F	I001	SAF	107	0	-0.0295444	0	0
I087	G6_I087	G6	4.12047	F	I002	INF	107.5	-0.0196078	-0.0224709	1	0
I087	G6_I087	G6	4.12047	F	I007	AF	125.5	-0.0151515	0.0293481	0	0
I087	G6_I087	G6	4.12047	F	I010	DSB	392.5	0	0.0299336	0	1
I087	G6_I087	G6	4.12047	F	I011	INF	95.5	-0.0144637	0.0126836	1	0
I087	G6_I087	G6	4.12047	F	I014	INF	101.5	0.008	0.0334359	1	0
I087	G6_I087	G6	4.12047	F	I019	BB	139	0	0.035401	0	0
I087	G6_I087	G6	4.12047	F	I021	SB	140.5	0	0	0	0
I087	G6_I087	G6	4.12047	F	I024	BB	118.5	0	0	0	0
I087	G6_I087	G6	4.12047	F	I025	AF	111	0	-0.00909091	0	0
I087	G6_I087	G6	4.12047	F	I040	AF	136	-0.0155039	0.0063967	0	1
I087	G6_I087	G6	4.12047	F	I041	SAM	101	-0.0128205	-0.028536	0	0
I087	G6_I087	G6	4.12047	F	I042	SB	173.5	0.0699927	0.154912	0	1
I087	G6_I087	G6	4.12047	F	I043	JUV	99	0	-0.06455	1	0
I087	G6_I087	G6	4.12047	F	I047	INF	104	0	-0.0313686	1	0
I087	G6_I087	G6	4.12047	F	I049	SAM	101.5	-0.025641	0.0335385	0	0
I087	G6_I087	G6	4.12047	F	I054	BB	98	0	0	0	0
I087	G6_I087	G6	4.12047	F	I055	JUV	104.5	0.00840336	0.00569561	1	0
I087	G6_I087	G6	4.12047	F	I061	SAM	107.5	0.024	0.0502222	0	0
I087	G6_I087	G6	4.12047	F	I062	BB	107.5	-0.03125	-0.0725665	0	0
I087	G6_I087	G6	4.12047	F	I069	SAM	98.5	-0.0350987	-0.0936656	0	1
I087	G6_I087	G6	4.12047	F	I07I	AF	116.5	0	0.00986501	0	0
I087	G6_I087	G6	4.12047	F	I076	AF	113	0	0.0338983	0	0
I087	G6_I087	G6	4.12047	F	I078	BB	115	0	0	0	0
I087	G6_I087	G6	4.12047	F	I080	AF	107	-0.019802	-0.0219048	0	0
I087	G6_I087	G6	4.12047	F	I081	AF	119	-0.015873	-0.0138889	0	0
I087	G6_I087	G6	4.12047	F	I089	JUV	104.5	0	0.0145985	1	0
I087	G6_I087	G6	4.12047	F	I093	AF	93.5	0	0.0221429	0	0
I087	G6_I087	G6	4.12047	F	I094	SB	366	0	0.00405557	0	0
I087	G6_I087	G6	4.12047	F	I105	SB	169.5	0	-0.015873	0	0
I087	G6_I087	G6	4.12047	F	I112	AF	111.5	0	0.0288663	0	0
I087	G6_I087	G6	4.12047	F	I115	INF	110.5	-0.0222222	0.100594	1	0
I087	G6_I087	G6	4.12047	F	I118	SAF	104.5	0	0.000280112	0	0
I087	G6_I087	G6	4.12047	F	I121	JUV	104.5	0	0.122327	1	0
I087	G6_I087	G6	4.12047	F	I122	INF	107	-0.0128205	-0.0309201	1	0
I087	G6_I087	G6	4.12047	F	I126	SB	101.5	0	0	0	0
I087	G6_I087	G6	4.12047	F	I127	BB	125	0	-0.0628225	0	0
I087	G6_I087	G6	4.12047	F	I131	INF	81.5	0	0.0215124	0	0
I087	G6_I087	G6	4.12047	F	I135	SAM	103.5	-0.0315789	-0.0484962	0	0
I087	G6_I087	G6	4.12047	F	I137	AF	110	0	0.030288	0	0
I087	G6_I087	G6	4.12047	F	I138	SAF	89	0	0.0040728	0	0
I087	G6_I087	G6	4.12047	F	I141	AF	121.5	0	-0.00934579	0	0
I089	G6_I089	G6	7.02259	M	I011	JUV	79	0.0102041	0.0408163	1	0
I089	G6_I089	G6	7.02259	M	I019	SB	77.5	0	-0.0151515	0	0
I089	G6_I089	G6	7.02259	M	I029	INF	79	0	0.019943	0	0
I089	G6_I089	G6	7.02259	M	I035	JUV	85	0	0.00407925	0	0
I089	G6_I089	G6	7.02259	M	I047	JUV	79	0	-0.0129252	1	0
I089	G6_I089	G6	7.02259	M	I049	BB	70	-0.0166667	-0.0458333	0	0
I089	G6_I089	G6	7.02259	M	I055	SAM	70	-0.0666667	-0.0625	1	0
I089	G6_I089	G6	7.02259	M	I07I	AF	102.5	0	0.0758621	0	0
I089	G6_I089	G6	7.02259	M	I073	INF	105.5	0	-0.0196078	0	0
I089	G6_I089	G6	7.02259	M	I079	INF	97	0	0.0102041	0	0
I089	G6_I089	G6	7.02259	M	I111	INF	75	0	0.0235294	0	0
I089	G6_I089	G6	7.02259	M	I112	AF	79	0	0.0204082	0	0
I089	G6_I089	G6	7.02259	M	I115	SAF	74.5	0.0240964	0.0481928	1	0
I089	G6_I089	G6	7.02259	M	I121	SAF	83.5	0	0.0239143	1	0
I089	G6_I089	G6	7.02259	M	I122	JUV	94	0	0.0272727	1	0
I089	G6_I089	G6	7.02259	M	I137	AF	101.5	0	-0.0224615	0	0
I100	G2_I100	G2	3.38946	F	I009	DSB	284.5	0.0277824	0.179225	0	1
I100	G2_I100	G2	3.38946	F	I015	AF	239.5	0	-0.0819251	0	0
I100	G2_I100	G2	3.38946	F	I023	INF	206.5	0.00796813	0.0729428	1	0
I100	G2_I100	G2	3.38946	F	I028	INF	233	-0.0357734	0.00643503	1	0
I100	G2_I100	G2	3.38946	F	I070	AF	266.5	0	-5.79357e-05	0	0
I100	G2_I100	G2	3.38946	F	I093	AF	260	0.00946372	-0.00842256	0	0
I100	G2_I100	G2	3.38946	F	I102	INF	263.5	0.0312453	0.144975	1	0
I102	G2_I102	G2	3.72621	M	I009	DSB	286	0.0740741	0.332133	0	0
I102	G2_I102	G2	3.72621	M	I015	AF	255.5	0.00961538	0.117881	0	0
I102	G2_I102	G2	3.72621	M	I020	AF	221	0	-0.130841	0	0
I102	G2_I102	G2	3.72621	M	I023	INF	214	-0.0115799	-0.00454759	0	0
I102	G2_I102	G2	3.72621	M	I028	INF	249.5	0.0302626	0.0976336	1	0
I102	G2_I102	G2	3.72621	M	I070	AF	277	-0.0133929	-0.120022	0	0
I102	G2_I102	G2	3.72621	M	I093	AF	267.5	0.0175439	0.0267703	0	0
I102	G2_I102	G2	3.72621	M	I100	INF	264	0.00862515	0.205451	1	0
I103	G4_I103	G4	3.21424	F	I013	INF	206	-0.00665703	0.0115136	1	0
I103	G4_I103	G4	3.21424	F	I027	INF	212	0.053095	0.106012	1	0
I103	G4_I103	G4	3.21424	F	I033	BB	213.5	-0.00458534	0.0339403	0	0
I103	G4_I103	G4	3.21424	F	I052	INF	209	-0.037738	0.0427223	1	0
I103	G4_I103	G4	3.21424	F	I059	DSB	320.5	0.236348	0.381978	0	0
I103	G4_I103	G4	3.21424	F	I075	AF	213.5	0.0133333	0.0518152	0	0
I103	G4_I103	G4	3.21424	F	I106	INF	212.5	-0.0122496	0.00650483	1	0
I103	G4_I103	G4	3.21424	F	I118	AF	221	0.00881057	0.0704846	0	0
I103	G4_I103	G4	3.21424	F	I119	SAM	203	0.00961538	0.0651224	0	0
I103	G4_I103	G4	3.21424	F	I136	AF	218	0.00440529	0.0161035	0	0
I103	G4_I103	G4	3.21424	F	I140	AF	221.5	0	-0.0353535	0	0
I103	G4_I103	G4	3.21424	F	I145	SB	305	0	0.00821687	0	0
I106	G4_I106	G4	5.48118	M	I013	JUV	230.5	0.00540898	0.184483	1	0
I106	G4_I106	G4	5.48118	M	I027	JUV	260.5	0.0100281	0.0948015	1	0
I106	G4_I106	G4	5.48118	M	I033	BB	257	0.0346821	0.100468	0	0
I106	G4_I106	G4	5.48118	M	I052	JUV	230.5	-0.0145601	0.0645444	1	0
I106	G4_I106	G4	5.48118	M	I059	DSB	368.5	-0.0062495	0.00880324	0	0
I106	G4_I106	G4	5.48118	M	I075	AF	260	0	0.0608766	0	0
I106	G4_I106	G4	5.48118	M	I095	INF	200.5	0.0258501	0.113671	0	0
I106	G4_I106	G4	5.48118	M	I103	JUV	233.5	0.0122608	0.0998107	1	0
I106	G4_I106	G4	5.48118	M	I118	AF	257.5	0.00283286	0.0631273	0	0
I106	G4_I106	G4	5.48118	M	I119	BB	266.5	0.00782826	-0.0420229	0	0
I106	G4_I106	G4	5.48118	M	I136	AF	263.5	-0.00555556	0.0776337	0	0
I106	G4_I106	G4	5.48118	M	I145	SB	368.5	0.0780361	0.21811	0	0
I108	G8_I108	G8	4.9117	M	I098	BB	332	0.021575	0.0655598	0	0
I108	G8_I108	G8	4.9117	M	I101	DSB	409.5	-0.0012689	0.0481077	0	0
I108	G8_I108	G8	4.9117	M	I123	BB	329	0.00062991	-0.0357937	0	0
I108	G8_I108	G8	4.9117	M	I141	AF	302	0.0133333	0.0107018	0	0
I108	G8_I108	G8	4.9117	M	I143	BB	329	0.0160455	0.0632764	0	1
I114	G1_I114	G1	4.45996	F	I006	AF	110.5	0	0.157192	0	0
I114	G1_I114	G1	4.45996	F	I033	INF	119	-0.00847458	-0.118785	1	0
I114	G1_I114	G1	4.45996	F	I034	JUV	117	-0.008	0.0712661	1	0
I114	G1_I114	G1	4.45996	F	I051	AF	105	-0.00840336	-0.0588235	0	0
I114	G1_I114	G1	4.45996	F	I059	SB	159	0	-0.00885179	0	1
I114	G1_I114	G1	4.45996	F	I067	SB	515.5	-0.0150212	-0.0752917	0	0
I114	G1_I114	G1	4.45996	F	I075	AF	113.5	0	-0.0373832	0	0
I114	G1_I114	G1	4.45996	F	I096	AF	109	0	0.0122689	0	0
I114	G1_I114	G1	4.45996	F	I098	SAM	113.5	0.0185185	0.153284	0	0
I114	G1_I114	G1	4.45996	F	I108	INF	104	-0.0131579	-0.148325	0	0
I114	G1_I114	G1	4.45996	F	I109	AF	119.5	0	0.00812836	0	0
I114	G1_I114	G1	4.45996	F	I113	SAF	111	0.00804551	-0.0612759	0	0
I114	G1_I114	G1	4.45996	F	I119	INF	119.5	-0.00934579	-0.149533	1	0
I114	G1_I114	G1	4.45996	F	I120	DSB	499	0.0792151	0.0344001	0	0
I114	G1_I114	G1	4.45996	F	I123	BB	107.5	-0.00736824	0.0505374	0	0
I114	G1_I114	G1	4.45996	F	I125	AF	118.5	0	-0.0249964	0	0
I114	G1_I114	G1	4.45996	F	I129	SB	129	0	-0.0534351	0	0
I114	G1_I114	G1	4.45996	F	I136	AF	107.5	0	-0.151754	0	0
I114	G1_I114	G1	4.45996	F	I140	AF	156	0	-0.0446927	0	0
I114	G1_I114	G1	4.45996	F	I143	JUV	111	0	-0.00260057	1	0
I114	G1_I114	G1	4.45996	F	I145	SB	155.5	0	-0.0157895	0	0
I115	G6_I115	G6	3.35113	F	I001	SAF	125.5	0.0982429	0.10395	0	1
I115	G6_I115	G6	3.35113	F	I002	INF	126	0	0.0439394	1	0
I115	G6_I115	G6	3.35113	F	I007	AF	149.5	0	0.0384615	0	0
I115	G6_I115	G6	3.35113	F	I010	DSB	413.5	-0.00978661	0.000247166	0	0
I115	G6_I115	G6	3.35113	F	I011	INF	117	0.00534759	0.0102496	1	0
I115	G6_I115	G6	3.35113	F	I012	AF	105	0	-0.0345395	0	0
I115	G6_I115	G6	3.35113	F	I014	INF	123	0.00724638	0.0623994	1	0
I115	G6_I115	G6	3.35113	F	I015	SAF	#REF!	0	0.0104167	0	0
I115	G6_I115	G6	3.35113	F	I019	BB	151.5	0	0.00806011	0	0
I115	G6_I115	G6	3.35113	F	I020	AF	#REF!	-0.00884956	-0.079646	0	0
I115	G6_I115	G6	3.35113	F	I021	SB	156	0.0285714	0.04	0	0
I115	G6_I115	G6	3.35113	F	I022	AF	120	0	0.047619	0	0
I115	G6_I115	G6	3.35113	F	I024	BB	134	0	-0.0336134	0	0
I115	G6_I115	G6	3.35113	F	I025	AF	132.5	0	-0.0103373	0	0
I115	G6_I115	G6	3.35113	F	I040	AF	163.5	0.00938967	0.0922906	0	0
I115	G6_I115	G6	3.35113	F	I041	SAM	111	0	0.0107843	0	0
I115	G6_I115	G6	3.35113	F	I042	SB	207	0	0.0365854	0	0
I115	G6_I115	G6	3.35113	F	I043	JUV	124.5	-0.0105579	-0.0511601	0	0
I115	G6_I115	G6	3.35113	F	I047	INF	128.5	0	-0.0525442	1	0
I115	G6_I115	G6	3.35113	F	I049	SAM	117	0	-0.0142602	0	0
I115	G6_I115	G6	3.35113	F	I054	BB	122.5	0.00724638	0.0434783	0	0
I115	G6_I115	G6	3.35113	F	I055	JUV	129	0.0208333	0.0537281	1	0
I115	G6_I115	G6	3.35113	F	I061	SAM	120	0	0.0166667	0	0
I115	G6_I115	G6	3.35113	F	I062	BB	129	0.00666667	0.06	0	0
I115	G6_I115	G6	3.35113	F	I069	SAM	116.5	0	0.00817582	0	0
I115	G6_I115	G6	3.35113	F	I07I	AF	138	0	0.0376984	0	0
I115	G6_I115	G6	3.35113	F	I072	AF	104.5	0	-0.049505	0	0
I115	G6_I115	G6	3.35113	F	I076	AF	128.5	0	0.0192001	0	0
I115	G6_I115	G6	3.35113	F	I078	BB	139.5	0.00561798	0.0617978	0	0
I115	G6_I115	G6	3.35113	F	I080	AF	131.5	0	0.0227055	0	0
I115	G6_I115	G6	3.35113	F	I081	AF	137.5	0	0.0493081	0	0
I115	G6_I115	G6	3.35113	F	I087	INF	119.5	-0.00162567	0.0480633	1	0
I115	G6_I115	G6	3.35113	F	I089	JUV	123	0.0208333	0.0106209	1	0
I115	G6_I115	G6	3.35113	F	I093	AF	124	0	-0.0405405	0	0
I115	G6_I115	G6	3.35113	F	I094	SB	399.5	0.0391504	0.0918699	0	0
I115	G6_I115	G6	3.35113	F	I099	AF	123	-0.00877193	0.0127592	0	0
I115	G6_I115	G6	3.35113	F	I104	SAF	111	0	0	0	0
I115	G6_I115	G6	3.35113	F	I105	SB	194	0.0818966	0.204907	0	1
I115	G6_I115	G6	3.35113	F	I112	AF	136	-0.0317667	-0.0642923	0	0
I115	G6_I115	G6	3.35113	F	I118	SAF	120	-0.0016835	0.0345118	0	0
I115	G6_I115	G6	3.35113	F	I121	INF	123	-0.0208333	0.0766667	1	0
I115	G6_I115	G6	3.35113	F	I122	INF	114	-0.03125	-0.0823864	1	0
I115	G6_I115	G6	3.35113	F	I126	SB	134.5	0	0.0448718	0	0
I115	G6_I115	G6	3.35113	F	I127	BB	150	0	-0.0166667	0	0
I115	G6_I115	G6	3.35113	F	I135	SAM	122	0	-0.0277778	0	0
I115	G6_I115	G6	3.35113	F	I137	AF	137.5	0	-0.0261699	0	0
I115	G6_I115	G6	3.35113	F	I138	SAF	116.5	0	-0.0408148	0	0
I115	G6_I115	G6	3.35113	F	I140	AF	104	0	0	0	0
I115	G6_I115	G6	3.35113	F	I141	AF	149	0	-0.0098541	0	0
I116	G7_I116	G7	5.03	M	I003	SB	138	0	0	0	1
I116	G7_I116	G7	5.03	M	I026	SB	146.5	0	0	0	0
I116	G7_I116	G7	5.03	M	I036	INF	127.5	0	-0.0296024	1	0
I116	G7_I116	G7	5.03	M	I039	SB	140.5	0	0	0	0
I116	G7_I116	G7	5.03	M	I053	SAF	134.5	0.00877193	-0.0049236	0	0
I116	G7_I116	G7	5.03	M	I056	AF	144	0	0.0879078	0	0
I116	G7_I116	G7	5.03	M	I063	SAF	134.5	0	0.00973154	0	0
I116	G7_I116	G7	5.03	M	I065	AF	155.5	0	0.0575269	0	1
I116	G7_I116	G7	5.03	M	I068	AF	133.5	0	0.0187123	0	0
I116	G7_I116	G7	5.03	M	I085	AF	140.5	0	0.0437316	0	0
I116	G7_I116	G7	5.03	M	I090	DSB	144.5	0	-0.0305344	0	0
I116	G7_I116	G7	5.03	M	I097	AF	143.5	0	-0.0201857	0	0
I116	G7_I116	G7	5.03	M	I110	SB	162	0	-0.0407603	0	0
I116	G7_I116	G7	5.03	M	I117	INF	149.5	0	-0.0124224	1	0
I116	G7_I116	G7	5.03	M	I128	BB	146	0	0.02	0	0
I116	G7_I116	G7	5.03	M	I133	SB	158.5	0	0.0246914	0	0
I116	G7_I116	G7	5.03	M	I134	SB	145	0	0.0306978	0	0
I116	G7_I116	G7	5.03	M	I142	INF	138.5	0	-0.0424423	0	0
I116	G7_I116	G7	5.03	M	I144	SB	154.5	0	-0.0310559	0	0
I116	G7_I116	G7	5.03	M	I146	BB	128.5	0.00833333	-0.0532238	0	0
I116	G7_I116	G7	5.03	M	I147	AF	146	0	0.0266667	0	0
I118	G6_I115	G6	7.21697	F	I001	SAF	107.5	0.0205622	0.168575	1	0
I118	G6_I115	G6	7.21697	F	I002	INF	108	0	0.0208333	0	0
I118	G6_I115	G6	7.21697	F	I007	AF	131.5	0	0.0263403	0	0
I118	G6_I115	G6	7.21697	F	I010	DSB	395.5	0	0.0463415	0	0
I118	G6_I115	G6	7.21697	F	I011	INF	99	0	0.0318627	0	0
I118	G6_I115	G6	7.21697	F	I012	AF	87	0	0	0	0
I118	G6_I115	G6	7.21697	F	I014	INF	105	0	0.000544663	0	0
I118	G6_I115	G6	7.21697	F	I015	SAF	84	0	0.0166667	1	0
I118	G6_I115	G6	7.21697	F	I019	BB	133.5	-0.0166667	0.0037415	0	0
I118	G6_I115	G6	7.21697	F	I020	AF	86.5	0	-0.0265487	0	0
I118	G6_I115	G6	7.21697	F	I021	SB	138	0	0.00719425	0	0
I118	G6_I115	G6	7.21697	F	I022	AF	102	0	-0.0526316	0	0
I118	G6_I115	G6	7.21697	F	I024	BB	116	0	0.0353982	0	0
I118	G6_I115	G6	7.21697	F	I025	AF	114.5	0	0	0	0
I118	G6_I115	G6	7.21697	F	I040	AF	145.5	0	0.0169492	0	0
I118	G6_I115	G6	7.21697	F	I041	SAM	93	0.047619	0.0798319	1	0
I118	G6_I115	G6	7.21697	F	I042	SB	189	0	0.0166667	0	0
I118	G6_I115	G6	7.21697	F	I043	JUV	106.5	0	0.0236917	1	0
I118	G6_I115	G6	7.21697	F	I047	INF	110.5	-0.00884956	-0.00762045	0	0
I118	G6_I115	G6	7.21697	F	I049	SAM	99	0	0.0128676	1	0
I118	G6_I115	G6	7.21697	F	I054	BB	104.5	0	-0.00934579	1	0
I118	G6_I115	G6	7.21697	F	I055	JUV	111	0	0	0	0
I118	G6_I115	G6	7.21697	F	I061	SAM	102	0	-0.0261905	1	0
I118	G6_I115	G6	7.21697	F	I062	BB	111	0	-0.0214425	1	0
I118	G6_I115	G6	7.21697	F	I069	SAM	98.5	0.000515677	0.00206271	1	0
I118	G6_I115	G6	7.21697	F	I070	AF	90	0	-0.00833333	0	0
I118	G6_I115	G6	7.21697	F	I07I	AF	120	-0.00925926	0.00420875	0	0
I118	G6_I115	G6	7.21697	F	I072	AF	86.5	0	-0.0495049	0	0
I118	G6_I115	G6	7.21697	F	I076	AF	110.5	0	0.020987	0	0
I118	G6_I115	G6	7.21697	F	I078	BB	121.5	0	0.0055083	1	0
I118	G6_I115	G6	7.21697	F	I080	AF	113.5	0	0.0166667	0	0
I118	G6_I115	G6	7.21697	F	I081	AF	119.5	0	-0.0446316	0	0
I118	G6_I115	G6	7.21697	F	I087	INF	101.5	0	0.0353801	0	0
I118	G6_I115	G6	7.21697	F	I089	JUV	105	0	0	0	0
I118	G6_I115	G6	7.21697	F	I094	SB	381.5	0	-0.000171956	0	0
I118	G6_I115	G6	7.21697	F	I099	AF	105	0	0.00328947	0	0
I118	G6_I115	G6	7.21697	F	I104	SAF	93	0	0	1	0
I118	G6_I115	G6	7.21697	F	I105	SB	176	-0.00641026	-0.0103349	0	0
I118	G6_I115	G6	7.21697	F	I112	AF	118	0	0.00796928	0	0
I118	G6_I115	G6	7.21697	F	I115	INF	120	-0.0016835	0.0345118	0	0
I118	G6_I115	G6	7.21697	F	I121	INF	105	0	0.0350877	0	0
I118	G6_I115	G6	7.21697	F	I122	INF	96	0	-0.0104167	0	0
I118	G6_I115	G6	7.21697	F	I126	SB	116.5	0	0	0	0
I118	G6_I115	G6	7.21697	F	I127	BB	132	0	0.0263889	0	0
I118	G6_I115	G6	7.21697	F	I131	INF	74	0	0.0181818	0	0
I118	G6_I115	G6	7.21697	F	I135	SAM	104	0	0.04	1	0
I118	G6_I115	G6	7.21697	F	I137	AF	119.5	0	-0.00325134	0	0
I118	G6_I115	G6	7.21697	F	I138	SAF	98.5	0.0449438	0.142738	1	0
I118	G6_I115	G6	7.21697	F	I139	SB	159.5	0	-0.00377358	0	0
I118	G6_I115	G6	7.21697	F	I140	AF	86	0	0.00200114	0	0
I118	G6_I115	G6	7.21697	F	I141	AF	131	0	0.0134228	0	0
I121	G6_I121	G6	3.8987	F	I001	SAF	107.5	-0.029703	-0.0342192	0	0
I121	G6_I121	G6	3.8987	F	I002	INF	111	0	0.0423977	1	0
I121	G6_I121	G6	3.8987	F	I007	AF	134.5	0	0.0564991	0	0
I121	G6_I121	G6	3.8987	F	I010	DSB	394.5	0.0302334	0.256196	0	0
I121	G6_I121	G6	3.8987	F	I011	INF	102	0	0.0426901	1	0
I121	G6_I121	G6	3.8987	F	I014	INF	108	0.0238095	0.0507937	1	0
I121	G6_I121	G6	3.8987	F	I019	BB	136.5	0	0.0125786	0	0
I121	G6_I121	G6	3.8987	F	I021	SB	141	0	0	0	0
I121	G6_I121	G6	3.8987	F	I024	BB	119	0	0	0	0
I121	G6_I121	G6	3.8987	F	I025	AF	120.5	0	0.0337565	0	0
I121	G6_I121	G6	3.8987	F	I040	AF	148.5	0.00606061	0.0757576	0	0
I121	G6_I121	G6	3.8987	F	I041	SAM	96	0	0.00718954	0	0
I121	G6_I121	G6	3.8987	F	I042	SB	186	0	-0.0243243	0	0
I121	G6_I121	G6	3.8987	F	I043	JUV	103.5	0	-0.0316081	1	0
I121	G6_I121	G6	3.8987	F	I047	INF	116.5	0.00757576	0.255851	1	0
I121	G6_I121	G6	3.8987	F	I049	SAM	102	0	-0.0119048	0	0
I121	G6_I121	G6	3.8987	F	I054	BB	107.5	0	0	0	0
I121	G6_I121	G6	3.8987	F	I055	JUV	114	0	0	1	0
I121	G6_I121	G6	3.8987	F	I061	SAM	108	-0.00925926	-0.0277778	0	0
I121	G6_I121	G6	3.8987	F	I062	BB	117	0	0.0185688	0	0
I121	G6_I121	G6	3.8987	F	I069	SAM	102	0	0.0583333	0	0
I121	G6_I121	G6	3.8987	F	I07I	AF	126	-0.00793651	-0.031746	0	0
I121	G6_I121	G6	3.8987	F	I076	AF	113.5	0	0.0478525	0	0
I121	G6_I121	G6	3.8987	F	I078	BB	121.5	0	-0.0120482	0	0
I121	G6_I121	G6	3.8987	F	I080	AF	113.5	0	0.00833333	0	0
I121	G6_I121	G6	3.8987	F	I081	AF	125.5	0	0.269735	0	0
I121	G6_I121	G6	3.8987	F	I087	INF	107.5	0	0.0768889	1	0
I121	G6_I121	G6	3.8987	F	I089	JUV	108	0	0	1	0
I121	G6_I121	G6	3.8987	F	I093	AF	106	0	0.00450281	0	0
I121	G6_I121	G6	3.8987	F	I094	SB	378.5	0	0.00287356	0	0
I121	G6_I121	G6	3.8987	F	I099	AF	108	0	-0.0335498	0	0
I121	G6_I121	G6	3.8987	F	I104	SAF	93	0	0	0	0
I121	G6_I121	G6	3.8987	F	I105	SB	179	0	-0.0258783	0	0
I121	G6_I121	G6	3.8987	F	I112	AF	118	0	0.00318771	0	0
I121	G6_I121	G6	3.8987	F	I115	INF	120	-0.0222222	0.108889	1	0
I121	G6_I121	G6	3.8987	F	I118	SAF	105	0	0.0333333	0	0
I121	G6_I121	G6	3.8987	F	I122	INF	102	0	0.0952381	1	0
I121	G6_I121	G6	3.8987	F	I126	SB	113.5	0	0	0	0
I121	G6_I121	G6	3.8987	F	I127	BB	132	0	0.00666667	0	0
I121	G6_I121	G6	3.8987	F	I135	SAM	107	0	0.0120072	0	0
I121	G6_I121	G6	3.8987	F	I137	AF	122.5	0	0.0556667	0	0
I121	G6_I121	G6	3.8987	F	I138	SAF	98.5	-0.0111111	0.00633437	0	0
I121	G6_I121	G6	3.8987	F	I141	AF	134	0	0	0	0
I130	G9_I004	G9	5.90828	M	I004	INF	410.5	0.0453496	0.197531	0	0
I130	G9_I004	G9	5.90828	M	I018	JUV	386.5	-0.00236526	-0.0130299	1	0
I130	G9_I004	G9	5.90828	M	I048	SAF	389	0.0421935	0.23174	1	0
I130	G9_I004	G9	5.90828	M	I051	AF	452.5	0	-0.00221765	0	0
I130	G9_I004	G9	5.90828	M	I133	DSB	431.5	0.0423647	0.116867	0	0
I130	G9_I004	G9	5.90828	M	I146	SB	422.5	0	-0.00708088	0	0
